1 **Novel Computational Method to Define RNA PSRs Explains Influenza A Virus**  
2 **Nucleotide Conservation**

3 Andrey Chursov<sup>1</sup>, Nathan Fridlyand<sup>2,3</sup>, Albert A. Sufianov<sup>4,5</sup>, Oleg I. Kiselev<sup>6,\*</sup>, Irina  
4 Baranovskaya<sup>6</sup>, Andrey Vasin<sup>6</sup>, Jonathan W. Yewdell<sup>3</sup> and Alexander Shneider<sup>5,7</sup>

5 <sup>1</sup> Datomic Group, 71 Amalienstr., Munich, 80799, Germany

6 <sup>2</sup> Laboratory of Translational Biology, School of Biosciences and Biotechnology, University of  
7 Camerino, Via Gentile da Varano III, 62032, Camerino, Italy

8 <sup>3</sup> Cellular Biology Section, Laboratory of Viral Diseases, NIAID, NIH

9 <sup>4</sup> Federal Center of Neurosurgery of the Ministry of Health of Russian Federation, 5  
10 Chervishevskiy Trakt, Tyumen, 625062, Russia

11 <sup>5</sup> I.M. Sechenov First Moscow State Medical University, 8 Malaya Trubetskaya St., Moscow,  
12 119048, Russia

13 <sup>6</sup> Smorodintsev Research Institute of Influenza, Prof. Popova str. 15/17, Saint-Petersburg,  
14 197376, Russia

15 \* deceased

16 <sup>7</sup> Department of Molecular Biology, Ariel University, Ariel, Israel

17

18 Email addresses:

19 AC: [achursov@datomicsgroup.com](mailto:achursov@datomicsgroup.com)

20 NF: [snatanf@gmail.com](mailto:snatanf@gmail.com)

21 AAS: [info@fcn-tmn.ru](mailto:info@fcn-tmn.ru)

22 OIK: [oleg\\_kiselov@hotmail.com](mailto:oleg_kiselov@hotmail.com)

23 IB: [irina.baranovskaja.1992@gmail.com](mailto:irina.baranovskaja.1992@gmail.com)

24 AV: [influenza.spb@gmail.com](mailto:influenza.spb@gmail.com)

25 JWY: [jyewdell@nih.gov](mailto:jyewdell@nih.gov)

26 AS: [ashneider@curelab.com](mailto:ashneider@curelab.com)

27

28 **ABSTRACT**

29 RNA molecules often fold into evolutionarily selected functional structures. Yet, the literature  
30 offers neither a satisfactory definition for “structured RNA regions”, nor a computational  
31 method to accurately identify such regions. Here, we define structured RNA regions based  
32 on the premise that both stems and loops in functional RNA structures should be conserved  
33 among RNA molecules sharing high sequence homology. In addition, we present a  
34 computational approach to identify RNA regions possessing evolutionarily conserved  
35 secondary structures, RNA ISRAEU (RNA Identification of Structured Regions As  
36 Evolutionary Unchanged). Applying this method to H1N1 influenza mRNAs revealed  
37 previously unknown structured RNA regions that are potentially essential for viral replication

38 and/or propagation. Evolutionary conservation of RNA structural elements may explain, in  
39 part, why mutations in some nucleotide positions within influenza mRNAs occur significantly  
40 more often than in others. We found that mutations occurring in conserved nucleotide  
41 positions may be more disruptive for structured RNA regions than single nucleotide  
42 polymorphisms in positions that are more prone to changes. Finally, we predicted  
43 computationally a previously unknown stem-loop structure and demonstrated that  
44 oligonucleotides complementing the stem (but not the loop or unrelated sequences) reduce  
45 viral replication *in vitro*. These results contribute to understanding influenza A virus evolution  
46 and can be applied to rational design of attenuated vaccines and/or drug designs based on  
47 disrupting conserved RNA structural elements.

48

## 49 **AUTHOR SUMMARY**

50 RNA structures play key biological roles. However, the literature offers neither a satisfactory  
51 definition for “structured RNA regions” nor the computational methodology to identify such  
52 regions. We define structured RNA regions based on the premise that functionally relevant  
53 RNA structures should be evolutionarily conserved, and devise a computational method to  
54 identify RNA regions possessing evolutionarily conserved secondary structural elements.  
55 Applying this method to influenza virus mRNAs of pandemic and seasonal H1N1 influenza A  
56 virus generated Predicted Structured Regions (PSRs), which were previously unknown. This  
57 explains the previously mysterious sequence conservation among evolving influenza strains.  
58 Also, we have experimentally supported existence of a computationally predicted stem-loop  
59 structure predicted computationally. Our approach may be useful in designing live  
60 attenuated influenza vaccines and/or anti-viral drugs based on disrupting necessary  
61 conserved RNA structures.

62

## 63 **INTRODUCTION**

64 The biological functions of RNA secondary structures and their evolutionary impact is a topic  
65 of great interest and importance (1-11). Since 1990s, conceptually novel computational  
66 approaches have been appearing to analyze RNA shapes. Multiple copies of the same RNA  
67 molecule fold into different coexisting conformations constituting an ensemble of RNA  
68 structures. The same nucleotide within the RNA may be coupled via W-C bonds in some  
69 conformations (being a part of a stem) while remaining uncoupled in others (i.e. belonging to  
70 a loop). If one analyzes the entire ensemble, they can attribute to each nucleotide within an  
71 RNA sequence its base pairing probability. This probability value reflects i) the percentage of  
72 RNA structures which have this particular nucleotide W-C bonded (although in different  
73 structures it may be bonded to a different coupling partners), and ii) the likelihood of each  
74 RNA structure within the ensemble of all possible conformations that is based on the  
75 structure’s free energy. Hence, if an RNA molecule contains X nucleotides, a series of X  
76 numbers ranging from 0 to 1 can be estimated such that each number reflects the probability  
77 of a nucleotide in this position to be coupled.

78

79 Viruses represent an excellent system for studying RNA structural biology based on several  
80 factors, including the high abundance of viral RNAs, the high mutation rate of many viruses,  
81 the ease of selecting conditional mutants, and the large number of closely related strains  
82 available for sequence conservation analysis.

83 Mutations disrupting influenza A virus RNA secondary structures dramatically reduce the  
84 levels of gene expression (12). We previously reported that influenza A virus, a negative  
85 strand RNA virus with a segmented genome, possesses clusters of nucleotides that  
86 significantly change their base pairing probabilities with temperature elevation (13). This  
87 suggests that local structures dispersed between non-structured RNA regions (nonPSRs)  
88 are evolutionarily selected.

89 Previous attempts to define “structured RNA regions” were aimed either at finding regions  
90 possessing the most stable secondary structure predicted by minimum free energy (MFE) of  
91 based paired sequences (14-16), or predicting a consensus secondary structure based on a  
92 given multiple-sequence alignment, which can be inferred either by means of energy-  
93 directed folding or using a phylogenetic stochastic context-free grammar model (17-21). The  
94 latter approach works well on short non-coding RNAs, which usually have one predicted  
95 stable structure, but its accuracy drops significantly with the increasing RNA length (22). In  
96 addition, mRNAs are typically less structured than non-coding RNAs, since structures  
97 interfere with translation by ribosomes (23). At the same time, the former approach  
98 misinterprets “PSRs” as stems possessing abnormally many W-C coupled nucleotides; i.e. it  
99 would view an RNA structure possessing evolutionarily conserved loops (where the  
100 nucleotides are not paired) as an unstructured element. The following example  
101 demonstrates how misleading interchangeable use of the words “structured” and “paired” is:  
102 a cloverleaf-like secondary structure may serve an indispensable biological function and be  
103 conserved in every strain of some organism, despite the fact that it may have fewer paired  
104 nucleotides than a simple stem (see Figure 1). Also, such approach may introduce systemic  
105 bias typically identifying mRNAs as less structured than non-coding RNAs, since excessive  
106 abundance of W-C pairing may interfere with translation by ribosomes (23).

107 In addition, any particular RNA sequence beyond certain length clearly can fold into stable  
108 alternative states with energies being somehow different from the global minimum (24-26);  
109 and several alternative RNA conformations coexist at equilibrium (27). Some of these RNA  
110 structures may be present in multiple RNAs, especially homologous ones, while others  
111 would exist for the particular sequence only. One can assume that evolutionary conservation  
112 of the RNA shape may be indicative of its biological function. Current approaches relied  
113 upon analysis of a single sequence cannot differentiate an evolutionarily conserved  
114 structural element from an RNA shape that is energetically favorable only in a particular  
115 strain. Thus, future progress in the field requires a new methodology. Addressing these  
116 problems and proposing a computational methodology free of these shortcuts is the main  
117 aim of this paper.

118

## 119 **Results**

### 120 **A Novel Quantitative Definition of Structured RNA Regions**

121 Here, we present a quantitative definition of a structured RNA region (PSR) that is equally  
122 useful to predicting both, stems and loops as structured regions based on their evolutionary  
123 conservation, and a new computational method for identifying those regions. The method is  
124 robust to random RNA shapes present in a particular sequence but not selected and  
125 conserved evolutionarily. We call this method RNA ISRAEU (RNA Identification of Structured  
126 Regions As Evolutionary Unchanged).

127 As the first step in this method, we created a non-redundant dataset of sequences for each  
128 RNA of interest constituted of highly homologous RNAs of the same length, and built  
129 multiple sequence alignments. For the second step, the probability of every nucleotide to be  
130 paired was calculated for each RNA sequence in the dataset. Third, we substituted every  
131 nucleotide in the multiple alignment, with the nucleotide's pairing probability, thus aligning  
132 pairing probabilities by nucleotide position. We took probabilities to be paired for all the 1st  
133 nucleotides in each RNA sequence and grouped them together; for all 2<sup>nd</sup> nucleotides; for all  
134 N<sup>th</sup> nucleotides. Thus, if we have X RNA sequences each constituted of Y nucleotides, we  
135 create Y sets of numbers ranging from 0 to 1; each set contains X numbers. Standard  
136 deviation was computed for each set of probability values corresponding to every position  
137 within the RNA. We proposed that such standard deviations be used as a measure of  
138 structural conservation in a specific position. If the standard deviation for a particular position  
139 within the RNA dataset was small, the probability of a nucleotide to be in a double-stranded  
140 conformation did not vary substantially across the entire dataset of aligned mRNAs. We call  
141 such positions "structure-conserved". In contrast, if the standard deviation was high, the  
142 probability of a nucleotide to be paired changed vastly from strain to strain, a position was  
143 called "structure-variable". The mean probability at a particular position did not matter to the  
144 position classification.

145 We called regions within RNA sequences formed by consecutive structure-conserved  
146 positions "Predicted Structured Regions" (PSRs), while regions predominantly formed by  
147 structure-variable positions were called "non-structured" (nonPSR). Apparently, such  
148 definition is stem-loop agnostic. A stretch of nucleotide positions, which demonstrate high  
149 probability of being paired across the entire dataset of RNAs, may form a functionally  
150 important and evolutionarily conserved stem. Similarly, a batch of nucleotide positions with  
151 low base pairing probabilities, which repeats itself across all RNAs in the dataset may form a  
152 functionally important and evolutionarily conserved loop. Still, further analysis is necessary to  
153 confirm both the stems and the loops. In all cases, within a PSR, the probability of each  
154 nucleotide to be in a double-stranded conformation does not vary significantly across the  
155 entire dataset of aligned RNAs and these positions are structure-conserved positions.

#### 156 **Identification of Structured RNA Regions in H1N1 Influenza Virus mRNAs**

157 We applied RNA ISRAEU to predict evolutionarily conserved RNA structures of influenza A  
158 virus (IAV) (28, 29).

159 We selected sequences encoded by the complete genomes of 107 pre-pandemic (1999 to  
160 2009) and 173 pandemic (post-2009) human H1N1 strains (Supplementary Table 2). In  
161 2009, a swine IAV strain was introduced into man and rapidly replaced the circulating  
162 strains. All mRNAs selected for a given gene were of the same length. For each of the 10

163 major viral mRNAs, we predicted structured regions and calculated sequence variation.  
164 Profiles for non-pandemic and pandemic NS2 mRNA are depicted in Figure 2 (profiles for  
165 other mRNAs are presented in Supplementary Figures 2-38).

166 142 and 134 PSRs were identified in non-pandemic and pandemic influenza mRNAs  
167 respectively. The length of PSRs varies from 5 to 121 nucleotides for non-pandemic and  
168 from 5 to 103 nucleotides for pandemic strains (Table 1). The number of PSRs varies from 2  
169 for NS2 to 31 for NP (Table 1). Only a fraction of PSRs overlap between pandemic and non-  
170 pandemic strains. In some mRNAs (namely PB1, PB2, PA, HA and NA), the percentage of  
171 such non-overlapping regions is higher than 70%. The location of each PSR are presented  
172 in Supplementary Table 3.

173 In comparing PSR profiles with the profiles of mean pairing probabilities, we found two  
174 evolutionarily conserved structural elements. One is located between positions 105 and 132  
175 in non-pandemic NS2 mRNA (Figure 2), which contains a previously unknown predicted  
176 conserved hairpin (Figure 3). Nucleotides 105 to 114 and 123 to 132 have a strong predicted  
177 tendency to be paired while intervening nucleotides 115 to 124 have a strong tendency to be  
178 unpaired. By comparing Figures 2(b) and 2(e), one can predict that this new hairpin structure  
179 also exists in pandemic NS2 influenza mRNAs. The second novel PSR identified in non-  
180 pandemic NS2 mRNA is between positions 24 and 89 (Figures 2 and 3). In this case  
181 pandemic mRNAs contain only the PSR created by nucleotides 40 to 73.

### 182 **Oligonucleotides complementing the stem of the newly Predicted Structured Regions** 183 **interfere with *in vitro* viral replication**

184 To test the computationally predicted RNA structured regions, we have designed  
185 oligonucleotides complementing the stem and the loop, as well as two controls of the same  
186 length. The first control did not complement any sequence within the viral or human genome  
187 while the other control bound a non-structured region adjacent to the PSR. The MDCK cell  
188 monolayer was either transfected with one of the oligonucleotides and then infected with  
189 A/California/7/09 strain or the cells were infected without prior transfection. The transfection  
190 doze was not toxic for the cells as it was proven by the cell viability assay. Twenty four hours  
191 post transfection and infection, the viral replication was assessed by developing the cell  
192 monolayer with anti-NP ELISA. We observed that only the decamer complementing the stem  
193 of the computationally predicted hairpin has significantly reduced the viral replication  
194 comparing to the controls. Neither the oligonucleotide complementing the loop, nor the two  
195 control oligos had a statistically significant effect on the *in vitro* viral replication (Figure 4).

### 196 **Location of the Most Mutable Positions**

197 We distinguish between two types of positions in the influenza genome – the mutable  
198 positions which mutate quite frequently, and conserved positions. We tested if positions  
199 mutating more often cluster outside of PSRs, while conserved positions are predominantly  
200 located within the PSRs. The numbers for both types of positions in every mRNA of  
201 pandemic and non-pandemic H1N1 strain are provided in the Supplementary Table 1.  
202 Percentage of highly mutable positions in influenza mRNAs varies in a range from 7.9% in  
203 M1 to 15.5% in NA and from 6.8% in M2 to 15.8% in HA for non-pandemic and pandemic  
204 influenza strains respectively. Among the highly mutable positions from 56.1% for NS1 to

205 88.4% for NP and from 50.0% for M2 to 85.1% for M1 are third-codon positions for non-  
206 pandemic and pandemic influenza mRNAs respectively. Results presented at plots (c) and  
207 (f) of Figure 2 and Supplementary Figures 2-38 demonstrate that the most mutable positions  
208 are randomly distributed within each mRNA and do not form clusters. Absence of  
209 relationship between mutability value for every nucleotide position and corresponding value  
210 of moving average of individual standard deviations of the probabilities of nucleotides to be  
211 paired was confirmed by calculating Pearson correlation coefficients (Supplementary Table 4  
212 and Supplementary Figures 39-58). All correlation coefficients were in a range from 0.006 to  
213 0.222. This result refutes the intuitive notion that location of mutable positions would  
214 correspond to the least structured RNA regions, while sequence conserved positions would  
215 be collocated with the most structured RNA regions.

## 216 **Comparison of Mutation's Effect on RNA PSRs**

217 We generated two groups of *in silico* mutants by introducing synonymous mutations into  
218 influenza mRNAs. In the first group, mutations were introduced only into positions that are  
219 highly prone to being mutated; in the second one, mutations were introduced only into  
220 sequence conserved positions. The number of introduced *in silico* mutations was  
221 proportional to the length of every mRNA (Table 1). The effects of two groups of *in silico*  
222 mutations on structured RNA regions were compared, as described in the Materials and  
223 Methods section (Table 2). The results of statistical tests (Table 2) demonstrate that for  
224 majority of mRNAs the mutations introduced into sequence conserved positions have a  
225 greater effect on PSRs than mutations introduced into the mutable positions. This result  
226 stands out the most in mRNAs of non-pandemic NP, M2, and NS1 genes and pandemic  
227 NS2 gene.

228

## 229 **DISCUSSION**

230 Evolutionarily conserved RNA structural elements may perform important biological  
231 functions. Hence, identification and/or prediction of such elements can help in the  
232 understanding of the mechanism of RNA functions. This is true for identification of not only  
233 paired regions (stems), but loops too. In fact, kissing loop interactions are a common type of  
234 tertiary interaction motif in RNA that brings terminal loops together through Watson-Crick  
235 base pairing. Also, bulged nucleotides in the loop-loop interaction can be critical for ligand-  
236 dependent regulation. Yet, despite many efforts, it has still been a challenge to introduce an  
237 objective, quantitative, biologically meaningful and computationally friendly definition of what  
238 a "structured" RNA region is. Therefore, we had to propose a new definition and a new  
239 computational methodology free of these shortcomings.

240 In analyzing an individual RNA sequence, one has little chance to distinguish a biologically  
241 important structure formed by a folded molecule from simply a random shape with no  
242 biological importance. However, if one observes the same RNA configuration conserved and  
243 repeated across all related RNA sequences isolated from different strains and/or species,  
244 this increases the likelihood of biologically significant RNA structure. Following this logic, a  
245 definition of a structured RNA region should be based on a dataset of multiple aligned RNA  
246 sequences. Thus, assume that some structural element in a particular location is of such

247 importance that it is present across all the strains. In this case, nucleotides in positions  
248 correspondent to the stem would have very high base pairing probabilities in all aligned RNA  
249 sequences of the dataset, while nucleotides in positions correspondent to the loop would  
250 have very low base pairing probabilities in all the strains. At the same time, nucleotides  
251 correspondent to a potential bistable structure would have their base pairing probabilities  
252 neither too high nor very low across all RNA sequences. Therefore, we propose that  
253 “structured RNA regions” are defined as the patterns of probability values of the nucleotides  
254 to be paired, which are manifested across the spectrum of strains and/or organisms. This  
255 definition equally considers the conservation of stems, loops and potential bistable structures  
256 while also providing a computationally friendly quantitative definition for the degree of RNA  
257 structure conservation.

258 Mathematically, the fact that nucleotides in a particular position in each RNA of a dataset are  
259 likely to belong to an evolutionarily conserved structural element means that if we collect  
260 values of pairing probabilities for this nucleotide from each RNA sequence in the dataset,  
261 and build a sample of these values to calculate its standard deviation, this standard deviation  
262 will be relatively low compared with the majority of standard deviations for other positions.  
263 Indeed, if this standard deviation is low, it means that mutations occurring in the analyzed  
264 RNA do not affect the base pairing probability of a nucleotide in this position across the  
265 spectrum of strains. Thus, it is most likely that mutations affecting pairing probability for this  
266 nucleotide are filtered out. This is a good indicator of evolutionary conservation and the  
267 biological importance of the RNA structure in this position. In contrary, if the standard  
268 deviation is high, it means that the correspondent nucleotide is very likely to be bonded in  
269 some strains but not in others; hence, the presence of any crucial RNA structure at this  
270 position is unlikely (unless there is a bistable secondary structure in this area playing roles in  
271 different functions). If an RNA contained five consecutive nucleotides with low standard  
272 deviations of their mean pairing probabilities, the region was considered structured.

### 273 **Applications of a Newly Introduced Computational Definition**

274 Introduction of a new definition adequately describing the subject matter under study and  
275 development of a new technique for analysis, however, are only as good as they can be  
276 applied to a multitude of biological phenomena, generate new observations and  
277 experimentally testable hypotheses, explain old conundrums, and generate new questions  
278 (41). The presented approach was used to examine the existence of structured RNA regions  
279 in mRNAs of pandemic and non-pandemic influenza A H1N1 virus. This method revealed  
280 that influenza mRNAs contain nucleotide positions highly conserved in their base pairing  
281 probabilities. For every analyzed RNA type, such positions group together and constitute  
282 well-defined structured RNA regions, while the rest of the RNA molecule is significantly less  
283 structured. To the best of our knowledge, such mosaic structurization of RNA molecules was  
284 not reported previously. *In vitro* testing has confirmed that interfering with a stem of a  
285 previously unknown computationally predicted RNA structured region indeed reduces viral  
286 replication. We expect that future experimental testing will reveal the functions, these  
287 evolutionarily conserved RNA secondary structures, perform during the course of viral  
288 infection.

289 We hypothesized that mosaic structurization of influenza mRNAs may explain a long-  
290 standing conundrum of why different nucleotides in influenza genome mutate with such a  
291 varied frequency. The enormous influence of amino acid conservation could explain only a  
292 part of this phenomenon because many nucleotide substitutions are synonymous ones thus  
293 cannot be explained by amino acid conservation. The first hypothesis was that if a mutation  
294 happens within a structured RNA region it would disrupt the structure and be filtered out.  
295 Thus, even if a mutation rate was the same for all nucleotides, the only mutations observed  
296 in nature would be those happening outside of the structured RNA regions (PSR) and  
297 neutral for RNA structures. If an exact picture of each RNA structure was available, it would  
298 be possible to define structurally disruptive mutations visually as those that change the  
299 shape(s) of the structure(s). However, modern computational methods do not make it  
300 possible to predict exact RNA structures for long RNA molecules. Such predictions are  
301 inaccurate and cannot be relied upon (14, 42-44). Thus, we had to define structurally  
302 disruptive mutations based on the number of nucleotides in structured RNA regions, which  
303 would change their W-C pairing probabilities to a level aberrant of their naturally observed  
304 range. Contrary to original expectations, we showed that the nucleotide positions which are  
305 the least prone to being mutated do not collocate with regions of conserved RNA structures.  
306 Instead, the frequently and/or rarely mutating positions are randomly spread along the RNA  
307 sequences. Although it was demonstrated that the most frequently mutating positions within  
308 influenza genome are not collocated within unstructured RNA regions, this finding does not  
309 refute the main hypothesis that states: "Mutations, which occur in nucleotide positions that  
310 are the most prone to single nucleotide polymorphisms, have less of an effect on structured  
311 RNA regions than mutations, which occur in positions that are less likely to be changed".

312 A mutation does not necessarily have to take place inside the PSR in order to be disruptive  
313 for a structure. For example, prior to mutation, a particular G was paired to a particular C  
314 forming a structure. If a mutation outside the structure changes some A to C, it may become  
315 a new pairing partner for the G, thereby leading to an energetically more favorable RNA  
316 folding and disrupting the original structural element. This effect may be especially strong if  
317 mutations outside of the PSRs occur in combinations. Also, mutations in certain positions  
318 may have a greater effect on RNA structures than that of other positions. Thus, if RNA  
319 structures should indeed remain intact for successful viral propagation, all positions, SNPs in  
320 which would have a striking effect on the structures, would seem as rarely mutating  
321 compared to those positions, SNPs in which would have little effect on the structures. The  
322 results presented here support this hypothesis. We demonstrated for some influenza  
323 mRNAs that *in silico* mutations introduced into nucleotide positions, which mutate in the wild  
324 less frequently, would possess a greater disruptive effect on areas of conserved RNA  
325 structures than *in silico* mutations in positions which are known to mutate more frequently.  
326 As a result, mutations deleterious for vital RNA structures would be eliminated due to the  
327 negative selection pressure. This demonstrates that conservation of RNA structures could  
328 be a contributing mechanism defining a highly differential mutation rate for different influenza  
329 nucleotide positions. Additionally, the computational conclusion stipulates a direction for  
330 experimental testing. Although it is time/cost-consuming, it is possible to test RNA shapes  
331 experimentally (4, 45-49). If our hypothesis is correct, then influenza mRNAs observed in  
332 nature and those RNAs carrying mutations, which we predicted to be structurally non-  
333 disruptive, would possess similar RNA structures. By contrast, introducing into the RNA



334 sequence mutations, which are predicted to disrupt structured RNA regions, would eliminate  
335 at least some of the RNA structures vital for a virus.

### 336 **Identification of Evolutionarily Conserved RNA Structural Elements**

337 Plotting a graph with nucleotide positions on axis X and standard deviations of nucleotide  
338 pairing probabilities for these positions on axis Y shows stretches along the RNA sequence  
339 with low standard deviations. These areas potentially have conserved RNA secondary  
340 structural elements. However, these graphs alone do not demonstrate whether the  
341 probability of a nucleotide to form bonds is high across different strains or low. In other  
342 words, a structurization profile may help identifying localization of RNA PSRs, but it does not  
343 indicate what kind of structure is there. Nevertheless, some assumptions about the RNA  
344 shape can be made if we complement structurization profiles with profiles presenting mean  
345 pairing probability for each nucleotide (i.e. for each nucleotide position in the RNA sequence,  
346 the pairing probability values from every RNA in the dataset would be used to calculate the  
347 mean for the position).

348 Extracting complex structures from comparing structurization profiles with profiles of mean  
349 pairing probabilities may require special analytical tools that are not a part of this first-stage  
350 study. However, discovering the simplest hairpin structure may not require additional  
351 instruments. Thus, when 10 nucleotides were found to possess very high means of  
352 probabilities to be bonded in the entire dataset, followed by 8 structurally conserved  
353 nucleotides which were apparently uncoupled, and then another 10 nucleotides that are  
354 likely to be paired and complementing the first 10 as W-C bonding partners, these findings  
355 showed existence of a previously unknown evolutionarily conserved RNA hairpin structure.  
356 *In vitro* testing has confirmed that interfering with a stem of a previously unknown  
357 computationally predicted RNA structured region indeed reduces viral replication. We expect  
358 that future experimental testing will reveal the functions, these evolutionarily conserved RNA  
359 secondary structures, perform during the course of viral infection.

360 It would be important to test whether pandemic and seasonal influenza strains indeed share  
361 some PSRs and whether the difference in RNA structurization may play a role in pandemic  
362 vs. non-pandemic viral phenotypes. Another direction of the future research would be to  
363 expand our computational definition of a structured RNA region to predict evolutionarily  
364 conserved RNA tertiary structures, especially in those RNAs that are hard to study by high-  
365 resolution experimental methods (50). In addition to helical segments, RNAs can fold into  
366 complex three-dimensional shapes. Computational modeling of RNA tertiary structures and  
367 determining of three-dimensional shapes of complex RNAs constitutes a major intellectual  
368 challenge (51-55). Thus, the most practical way to expand the proposed computational  
369 method to studying RNA 3D structures would be to incorporate RNA 3D structural modules  
370 that define sets of non-Watson-Crick base pairs embedded in WC pairs (56, 57).

### 371 **Novel Approach for the Rational Design of Live-Attenuated Vaccines and Anti-Viral 372 Therapies**

373 The method we proposed and applied to define structured RNA regions revealed several  
374 areas possessing conserved secondary structures in mRNAs of H1N1 influenza virus. As a  
375 next step, these structures have to be confirmed by *in vitro* analysis and their biological roles

376 have to be assessed *in vitro* and/or *in vivo*. Potentially, structurally conserved RNA regions  
377 of viral RNAs may become a novel class of anti-viral drug targets. For example, anti-viral  
378 agents selectively disrupting RNA structures vital for a viral life cycle may become a new  
379 class of anti-viral therapies. As a preliminary proof of concept, we have demonstrated that an  
380 oligonucleotide binding the computationally predicted stem of a hairpin in a PSR, indeed acts  
381 as an anti-viral agent reducing *in vitro* viral replication. In contrast, statistically significant  
382 effect on viral replication was not observed if the infected cells transfected with the oligos of  
383 the same length, which bind outside of the predicted hairpin or do not bind to anything at all.  
384 Interestingly, even an oligonucleotide complementing the loop of this hairpin was unable to  
385 reduce viral replication in a statistically significant manner. Thus, the anti-viral effect was  
386 specific to disrupting the hairpin's stem. RNA ISRAEU allows rapid rational design of  
387 oligonucleotide cocktails interfering with multiple computationally predicted structures, so no  
388 single or few mutations would result in a resistant viral strain.

389 Several approaches have been proposed for analysis of impact of SNPs on RNA structures  
390 and deleterious mutation prediction (1, 58), including RNAsnp (59, 60), SNPfold (61),  
391 RNAmute (62, 63), RNAmutants (64), and RDMAS (65). However, all these methods  
392 compare structures of the original and mutated RNAs assessing the distance, the effect on  
393 the RNA structure caused by SNPs. Although these methods are productive for the tasks  
394 they were developed for, they cannot be applied to our problem. We do not compare  
395 structures of an original and an altered RNA sequences. Instead, we compare structures of  
396 hundreds of RNA sequences without attributing any of them the "original" status. Therefore,  
397 the approach proposed here allows us to define: (i) a naturally occurring range of  
398 probabilities, which represents a range of probability values that are the most likely to be  
399 observed for natural RNA strains (see Quantitative Assessment of Mutation's Effect on RNA  
400 PSRs in the Materials and Methods section for the specification) for every nucleotide  
401 position within an RNA region possessing an evolutionarily conserved structure; (ii)  
402 mutation(s) that would change base pairing probabilities within the structured RNA regions to  
403 an extent that the new probabilities would not belong to a naturally occurring range for  
404 corresponding positions.

405

406 Finally, we propose a new approach for the rational design of attenuated vaccines that would  
407 be based on predicting mutations disruptive for conserved RNA structures and introducing  
408 such mutations into viral genome. Indeed, disruption of an mRNA structure may serve as a  
409 functional gene knock out reducing expression of a viral gene to a level insufficient for viral  
410 cycle (12). Viral strain possessing such RNA can be administered to induce an immune  
411 response with little risk for a patient. Such attenuated viral strains can be grown on  
412 supporting cell lines actively expressing the limiting protein. Although LAVs are the most  
413 successful achievements in the history of public health (38), we believe there were no prior  
414 attempts to create LAVs based on perturbation of RNA structures.

415

## 416 **MATERIALS AND METHODS**

417

### 418 **Data**

419 Selecting H1N1 influenza mRNAs for this work constituted a crucial initial step. Influenza A  
420 genome consists of eight segments encoding seventeen proteins (66). Seven of those  
421 proteins were excluded from the analysis due to the limited information about them. It is  
422 known, however, that different influenza segments have different mutation rates (67). To  
423 eliminate potential bias that can be caused by disproportional representation of similar  
424 hemagglutinin (HA) and neuraminidase (NA) sequences (these two influenza genes are  
425 sequenced more often than the others because they constitute major viral antigens) and to  
426 compare evolutionary structure conservation between different influenza mRNAs, only  
427 completely sequenced influenza genomes were utilized in the analysis. An influenza genome  
428 was considered completely sequenced if it had no missing parts, no unknown nucleotides,  
429 and if sequences of the ten major mRNAs (namely, PB1, PB2, PA, HA, NP, NA, M1, M2,  
430 NS1, and NS2) were known. In order to further increase coherence of the dataset, only  
431 human influenza strains were utilized; other hosts were excluded because they demonstrate  
432 different characteristics (68). Finally, only those strains possessing the identical length of  
433 each influenza mRNA were selected. The fact that every mRNA of the same type has the  
434 same length in every viral genome selected eliminates potential mistakes, which could be  
435 introduced by effects of deletion and insertion polymorphisms (DIPs) on RNA secondary  
436 structures. Sequences of pandemic and non-pandemic complete influenza genomes  
437 satisfying the above mentioned criteria were downloaded from the Influenza Virus Resource  
438 (<http://www.ncbi.nlm.nih.gov/genomes/FLU/FLU.html>) (69).

#### 439 **Filtering Redundant Sequences**

440 Redundancy of data may introduce significant bias. To avoid it, one must only use a  
441 representative subset of sequences instead of analyzing all possible strains. Therefore,  
442 strains that were too similar were eliminated from further analysis; and, a non-redundant  
443 subset of strains was created. Any two strains in the non-redundant subset possess no less  
444 than 50 nucleotide differences per complete genome. In short, the first strain was chosen  
445 randomly from the dataset described in the previous section, then added to the non-  
446 redundant subset. Then, a different strain was randomly chosen and added to the non-  
447 redundant subset only if the newly chosen sequence had at least 50 nucleotide differences  
448 versus all strains in the non-redundant subset. This step was repeated until no more  
449 sequences could be added to the non-redundant subset. The described procedure was done  
450 separately for the pandemic and non-pandemic influenza datasets described above.

#### 451 **Structural Conservation of a Nucleotide Position**

452 As a first step, for each mRNA sequence in the datasets, the probability of every nucleotide  
453 within an RNA chain to be coupled via W-C bond was calculated. For that purpose, the  
454 RNAfold tool from the Vienna RNA package was used (70). RNAfold was used with the  
455 command line options `-p` that calculates the partition function and base pairing probability  
456 matrix, `--noLP` that disallows base pairs that can only occur as helices of length 1, and the  
457 default folding temperature fixed at 37°C. As a result, if a non-redundant dataset consisted  
458 of N sequences, a sample of N probability values would be created for each position (exactly  
459 N for a position, in which there is no deletion/insertion polymorphisms) within analyzed RNA.  
460 The standard deviation was calculated for every sample. The procedure described above  
461 was conducted for each of ten mRNAs from both subsets. Thus, we have calculated

462 standard deviations of the probabilities of nucleotides to be paired for every nucleotide  
463 position within each of ten influenza mRNAs in both pandemic and non-pandemic datasets.  
464 To smooth stochastic fluctuations, moving averages of individual standard deviations with  
465 the sliding window of 5-nt length were calculated (Figure 2). To determine structure  
466 conserved positions, all moving average values of individual standard deviations from all  
467 mRNAs were combined to one dataset of moving averages, and the mean value and  
468 standard deviation of the values in that dataset were calculated. If an individual moving  
469 average calculated for a particular position was smaller than the overall mean of moving  
470 averages minus the overall standard deviation of moving averages, the correspondent  
471 position was considered “structure-conserved”.

## 472 **RNA Structurization and Structured RNA Regions**

473 As described above, noticeable areas of structure-conserved positions possessing low  
474 standard deviation values were observed. Areas possessing at least five consequent  
475 structure-conserved nucleotides were defined as “structured RNA regions”. The described  
476 procedure was repeated separately for pandemic and non-pandemic influenza strains.

## 477 **Mutability**

478 Intuitively, “mutability” demonstrates how likely it is for a nucleotide in a particular position to  
479 be mutated. Mathematically, this simple notion is defined as the value of Shannon entropy  
480 (35), which is calculated based on the frequencies of every ribonucleotide recorded in a  
481 particular position, with a pseudocount regularizers equal to 1 being added to the frequency  
482 of each of four ribonucleotides according to Laplace’s rule. To identify nucleotide positions  
483 that are the most/least prone to being mutated, the mutability value was computed for each  
484 nucleotide position. The more variable a set of ribonucleotides observed in a particular  
485 position, the higher the entropy. Then, all mutability values from all mRNAs were combined  
486 into one dataset. Those positions that had their mutability values higher than the 80th  
487 percentile of the dataset were considered as mutable positions. In contrast, those positions  
488 that did not contain SNPs among the sequences in the dataset were considered conserved  
489 positions. The described procedure was repeated separately for pandemic and non-  
490 pandemic influenza strains.

## 491 **Quantitative Assessment of Mutation’s Effect on RNA PSRs**

492 Following the analysis discussed above, a new method was proposed and implemented,  
493 which defines “structurally disruptive mutations” based on their effect on structured RNA  
494 regions (PSRs). As described previously, two datasets of aligned influenza sequences were  
495 created. For each individual RNA sequence within the datasets, the probability of each  
496 nucleotide to be paired was computed. For every nucleotide position within coding regions of  
497 influenza mRNA sequences, the mean value and the standard deviation of the probabilities  
498 of nucleotides to be paired were calculated. Based on these values, a naturally occurring  
499 range of probabilities was calculated for every nucleotide position within a PSR. A naturally  
500 occurring range of probabilities was defined as a range of probabilities from the mean value  
501 decreased by two standard deviations to the mean value increased by two standard  
502 deviations.

503 Apparently, a mutation occurring in an RNA sequence may change probability of forming  
504 Watson-Crick pairs for multiple nucleotides within a particular sequence. For some of those  
505 nucleotides, their new probability values would still belong to the naturally occurring range of  
506 probabilities for this position. For other positions, the mutation would change their pairing  
507 probabilities to an extent that the new probabilities would not belong to their naturally  
508 occurring range. A quantitative effect of mutation(s) on RNA structurization is defined as a  
509 number of nucleotides within structured RNA regions (PSRs), which would change their  
510 probabilities to an extent that the new probabilities would not belong to a naturally occurring  
511 range for corresponding positions.

### 512 **Statistical Analysis: Do Mutations Taking Place in the Most vs. Least Often Mutating** 513 **Positions Have a Different Effect on RNA Structurization?**

514 Some positions in influenza genome are more prone to being mutated than others. The  
515 ability to define quantitatively effects of mutations on RNA structurization permitted the  
516 opportunity to propose a method for assessment, if mutations taking place in the frequently  
517 mutating positions have the same effect on RNA structurization as mutations occurring in the  
518 conserved ones. Two sets of *in silico* mutants were generated introducing synonymous  
519 mutations in nucleotide positions that are either the most or the least prone to being  
520 mutated. These two sets of mutations were compared for their effect on structured RNA  
521 regions.

522 In order to normalize for the length difference among influenza mRNAs, the number of  
523 changed nucleotides, which were introduced into each mRNA, was in proportion to the  
524 length of the mRNA (Table 1). The required number of synonymous SNPs was introduced  
525 into every mRNA sequence from the original datasets. In order to generate an *in silico*  
526 mutant from an original mRNA sequence, the required number of positions that are the most  
527 or the least prone to being mutated were randomly selected. Every codon, which contains  
528 the selected position, was changed to an alternative one encoding the same amino acid with  
529 the condition that the new codon is not observed in the particular position in any mRNA  
530 sequence from the datasets. Influenza mRNAs contain relatively high number of conserved  
531 positions and relatively few often mutating ones. As a result, for every mRNA, the number of  
532 *in silico* mutants with SNPs in conserved positions was equal to the number of wild type  
533 influenza strains in the datasets. However, due to a small number of frequently mutating  
534 positions, it was impossible for some mRNAs to generate the same number of unique  
535 mutants by introducing SNPs only to positions prone to being mutated. In those cases, all  
536 possible mutants were kept for further analysis - namely, 103 for non-pandemic M2, 95 for  
537 pandemic M2, and 109 for pandemic NS2.

538 For each computer-generated mutant, the probability of every nucleotide to be in a double-  
539 stranded conformation was calculated. Based on those probabilities, we calculated the  
540 number of nucleotides within structured RNA regions (PSRs), which changed their  
541 probability of being paired to a value outside of the naturally occurring range of probabilities  
542 for this position. Such numbers were combined into two datasets: one for mutations  
543 introduced into highly mutable positions and another – for mutations introduced in highly  
544 conserved positions. The Mann-Whitney U test was conducted for comparing these two  
545 datasets. The significance level for the test was Bonferroni-corrected by dividing the

546 significance level of 5% by the total number of mRNAs in influenza virus, i.e. 10. The  
547 described procedure was repeated separately for pandemic and non-pandemic influenza  
548 strains.

#### 549 **Profiles of Mean Pairing Probabilities**

550 Profiles of mean pairing probabilities were created for influenza mRNAs (Figure 2 and  
551 Supplementary Figures 2-38). These profiles demonstrate how likely on average each  
552 nucleotide within an mRNA is to be paired based on an analysis of the entire dataset of  
553 sequences. As mentioned, for every RNA sequence in the dataset, the probability of every  
554 nucleotide within the RNA chain to be coupled via W-C bond was calculated. Then, for every  
555 nucleotide position, we computed the mean for probability values of this nucleotide based on  
556 all RNA sequences. The resulting series of means is used as a profile of mean pairing  
557 probabilities for a particular mRNA. The same work was performed for every influenza  
558 mRNA.

#### 559 **Virus and Cells**

560 Influenza virus A/California/7/09 (H1N1pdm) was provided by the Research Institute of  
561 Influenza museum of viruses, Saint-Petersburg, Russian Federation. The 50% tissue culture  
562 infective dose (TCID<sub>50</sub>) of this virus strain was defined by Reed–Muench method (72). The  
563 aliquots of virus were stored at -80oC. According to the American Tissue Madin-Darby  
564 canine kidney (MDCK) cell culture was provided from the cell collection of Research Institute  
565 of Influenza, Saint-Petersburg, Russian Federation. Cells were cultivated in cultural flasks  
566 using minimum essential medium Eagle alpha modification (aMEM, Biolot) with 2mM L-  
567 glutamine supplemented with 10% heat-inactivated fetal bovine serum (FBS, GIBCO, USA).

#### 568 **Design of Antisense DNA-oligonucleotides**

569 We designed antisense oligonucleotides, which may potentially disrupt the aforementioned  
570 predicted RNA-structure. A random oligonucleotide, “rand10”, with minimal probability of  
571 having targets in the human hosts and viral genome was used as a control . Another control,  
572 “off10”, was an oligonucleotide with a target to the adjacent region on the NS2 gene mRNA  
573 (Table 3).

574

#### 575 **Cell Viability Assay**

576 The cell viability was determined 24 hours post infection and transfection by  
577 microtetrazolium test (MTT assay). A solution of MTT [3-(4,5-dimethylthiazol-2-yl)-2,5-  
578 diphenyltetrazolium bromide] (Sigma) at a concentration of 2,5 mg/ml was prepared in PBS.  
579 The medium was removed, the cells were washed once with PBS, MTT solution was added  
580 into the wells (100 ul/well). The cells were incubated at 37°C and 5% CO<sub>2</sub> for 4 hours and  
581 then the solution was removed and 96% ethanol (100 ul/well) was added for formazan  
582 crystals dissolving. The absorbance signal was measured using multifunctional reader  
583 CLARIOstar ©(BMG LABTECH, Germany) at 535 nm.

#### 584 **Virus Infection and Transfection**

585 The cells were detached by 0,25% trypsin/EDTA solution (Invitrogen) for 5 min and plated in  
586 96-well plates (Nucl) at 104 cells per well the day before the infection experiment. Cells were  
587 washed twice with Dulbecco's Phosphate-Buffered Saline (DPBS, GIBCO) and infected with  
588 A/California/7/09 (H1N1pdm) viral strain in 100TCID50 dose per well. The medium for cells  
589 infection was minimum essential medium Eagle alpha modification (aMEM, Biolot) with 2mM  
590 L-glutamine, 2,5 ug/ml trypsin TPCK-treated from bovine pancreas (TPCK, Sigma) and  
591 1:100 antibiotic-antimycotic (100X, GIBCO). Inoculation was conducted at 37°C and 5%  
592 CO2 for 60 minutes. Then the medium was removed and the cells were transfected using  
593 100 µl of OptiPro SFM medium (GIBCO) contained 10 µM of DNA-oligonucleotides and 0.7  
594 µl/well of Lipofectamine 2000 (Invitrogen) according to the manufacturer's protocol. In  
595 addition, the transfection medium is also supplemented with 1:100 antibiotic-antimycotic  
596 (100X) and 2,5 ug/ml TPCK. Viral control samples were also transfected with lipofectamin  
597 2000 only, without any oligonucleotides. Four hours post-transfection, the medium was  
598 replaced with fresh aMEM (Biolot) which contained 2mM L-glutamine, 2,5 ug/ml TPCK and  
599 1:100 antibiotic-antimycotic (100X). Twenty four hours post- infection, cells were used for the  
600 further relative ELISA analyses. Each treatment was performed in triplicates.

### 601 **Enzyme-Linked Immunosorbent Assays (ELISA)**

602 Twenty four hours post influenza virus infection and transfection with oligonucleotides,  
603 continuity of the cell monolayer was assessed microscopically. Then, medium was removed  
604 and the MDCK cells in 96-wells Nunc plates were fixed with 150 µl per well of cold 80%  
605 acetone at 4°C for 30 minutes. The fixed samples were washed three times with phosphate  
606 buffered saline containing 0.05% Tween (PBS-T) and blocked with 5% milk dissolved in  
607 PBST (200 ul/well) for 30 minutes at 37°C. The fixed cells were incubated with 1ug/ml  
608 mouse antibody against NP-protein (100 ul/well) produced in the Influenza Research  
609 Institute (clone 4H1) at 37°C for 1 hour. After the next three washes the secondary goat anti-  
610 mouse antibody conjugated with horseradish peroxidase (GAM-HRP, BioRad, USA) was  
611 added at 1ug/ml (100 ul/well) and incubated for 1 hour at 37°C. Cells were washed three  
612 times with PBS-T followed by adding TMB Peroxidase EIA Substrate Kit (Bio-Rad, USA)  
613 according to manufacturer's instructions for further absorbance analysis. The absorbance  
614 was measured using multifunctional reader CLARIOstar® (BMG LABTECH) as delta optical  
615 density OD 450 – OD 655. The absorbance signal from uninfected cells was taken as zero  
616 and was subtracted from the obtained values of the samples. The results were presented  
617 relative to infection control.

### 618 **Statistical Analysis of Viral Replication Inhibition Assay**

619 Data shown are means +/- SD as percentage of untreated "Flu" group. P-values for  
620 comparing the four treatment groups with the untreated group (Flu) were calculated using  
621 student T test. The significance level for the test was Bonferroni-corrected by dividing the  
622 significance level of 0.05 by the total number of group comparisons, i.e. 10. Analysis was  
623 performed using the R software.

624

### 625 **FUNDING**

626 This work was supported by CureLab Oncology, Inc.; and the Deutsche  
627 Forschungsgemeinschaft International Research Training Group 'Regulation and Evolution  
628 of Cellular Systems' [GRK 1563]. NF and JWY were supported by the Division of Intramural  
629 Research, NIAID, Bethesda MD, USA.

630

## 631 **ACKNOWLEDGEMENTS**

632 The authors would like to thank Prof. Dmitrij Frishman, a Ph.D. advisor of Andrey Chursov.  
633 This work was partially performed during AC term in Dmitrij Frishman's lab. The authors  
634 would also like to thank Prof. Adolfo Garcia-Sastre for illuminating comments on the article  
635 and the methodology, and Prof. Andrey Mironov and Prof. Ilya Muchnik for intellectually  
636 stimulating discussions.

637

## 638 **REFERENCES**

- 639 1. Bevilacqua PC, Blose JM. Structures, kinetics, thermodynamics, and biological functions of  
640 RNA hairpins. *Annu Rev Phys Chem.* 2008;59:79-103.
- 641 2. Chursov A, Frishman D, Shneider A. Conservation of mRNA secondary structures may filter  
642 out mutations in Escherichia coli evolution. *Nucleic Acids Res.* 2013;41(16):7854-60.
- 643 3. Wan Y, Kertesz M, Spitale RC, Segal E, Chang HY. Understanding the transcriptome through  
644 RNA structure. *Nat Rev Genet.* 2011;12(9):641-55.
- 645 4. Wan Y, Qu K, Ouyang Z, Kertesz M, Li J, Tibshirani R, et al. Genome-wide measurement of  
646 RNA folding energies. *Mol Cell.* 2012;48(2):169-81.
- 647 5. Dethoff EA, Chugh J, Mustoe AM, Al-Hashimi HM. Functional complexity and regulation  
648 through RNA dynamics. *Nature.* 2012;482(7385):322-30.
- 649 6. Geisler S, Collier J. RNA in unexpected places: long non-coding RNA functions in diverse  
650 cellular contexts. *Nat Rev Mol Cell Biol.* 2013;14(11):699-712.
- 651 7. Rouskin S, Zubradt M, Washietl S, Kellis M, Weissman JS. Genome-wide probing of RNA  
652 structure reveals active unfolding of mRNA structures in vivo. *Nature.* 2014;505(7485):701-5.
- 653 8. Shabalina SA, Spiridonov NA, Kashina A. Sounds of silence: synonymous nucleotides as a key  
654 to biological regulation and complexity. *Nucleic Acids Res.* 2013;41(4):2073-94.
- 655 9. Mortimer SA, Kidwell MA, Doudna JA. Insights into RNA structure and function from  
656 genome-wide studies. *Nat Rev Genet.* 2014;15(7):469-79.
- 657 10. Tuplin A. Diverse roles and interactions of RNA structures during the replication of positive-  
658 stranded RNA viruses of humans and animals. *J Gen Virol.* 2015;96(Pt 7):1497-503.
- 659 11. Chursov A, Kopetzky SJ, Bocharov G, Frishman D, Shneider A. RNAtips: Analysis of  
660 temperature-induced changes of RNA secondary structure. *Nucleic Acids Res.* 2013;41(Web Server  
661 issue):W486-91.
- 662 12. Ilyinskii PO, Schmidt T, Lukashev D, Meriin AB, Thoidis G, Frishman D, et al. Importance of  
663 mRNA secondary structural elements for the expression of influenza virus genes. *OMICS.*  
664 2009;13(5):421-30.
- 665 13.  
666 Chursov A, Kopetzky SJ, Leshchiner I, Kondofersky I, Theis FJ, Frishman D, et al. Specific temperature-  
667 induced perturbations of secondary mRNA structures are associated with the cold-adapted  
668 temperature-sensitive phenotype of influenza A virus. *RNA Biol.* 2012;9(10):1266-74.
- 669 14. Seetin MG, Mathews DH. RNA structure prediction: an overview of methods. *Methods Mol*  
670 *Biol.* 2012;905:99-122.



- 671 15. Gruber AR, Findeiss S, Washietl S, Hofacker IL, Stadler PF. RNAz 2.0: improved noncoding  
672 RNA detection. *Pac Symp Biocomput.* 2010;69-79.
- 673 16. Soldatov RA, Vinogradova SV, Mironov AA. RNASurface: fast and accurate detection of  
674 locally optimal potentially structured RNA segments. *Bioinformatics.* 2014;30(4):457-63.
- 675 17. Washietl S, Pedersen JS, Korbel JO, Stocsits C, Gruber AR, Hackermuller J, et al. Structured  
676 RNAs in the ENCODE selected regions of the human genome. *Genome Res.* 2007;17(6):852-64.
- 677 18. Hofacker IL, Fekete M, Stadler PF. Secondary structure prediction for aligned RNA  
678 sequences. *J Mol Biol.* 2002;319(5):1059-66.
- 679 19. Knudsen B, Hein J. RNA secondary structure prediction using stochastic context-free  
680 grammars and evolutionary history. *Bioinformatics.* 1999;15(6):446-54.
- 681 20. Knudsen B, Hein J. Pfold: RNA secondary structure prediction using stochastic context-free  
682 grammars. *Nucleic Acids Res.* 2003;31(13):3423-8.
- 683 21. Washietl S, Hofacker IL. Consensus folding of aligned sequences as a new measure for the  
684 detection of functional RNAs by comparative genomics. *J Mol Biol.* 2004;342(1):19-30.
- 685 22. Gardner PP, Giegerich R. A comprehensive comparison of comparative RNA structure  
686 prediction approaches. *BMC Bioinformatics.* 2004;5:140.
- 687 23. Chen C, Zhang H, Broitman SL, Reiche M, Farrell I, Cooperman BS, et al. Dynamics of  
688 translation by single ribosomes through mRNA secondary structures. *Nat Struct Mol Biol.*  
689 2013;20(5):582-8.
- 690 24. Schultes EA, Bartel DP. One sequence, two ribozymes: implications for the emergence of  
691 new ribozyme folds. *Science.* 2000;289(5478):448-52.
- 692 25. Hobartner C, Micura R. Bistable secondary structures of small RNAs and their structural  
693 probing by comparative imino proton NMR spectroscopy. *J Mol Biol.* 2003;325(3):421-31.
- 694 26. Weeks KM. Advances in RNA structure analysis by chemical probing. *Curr Opin Struct Biol.*  
695 2010;20(3):295-304.
- 696 27. Thirumalai D, Hyeon C. RNA and protein folding: common themes and variations.  
697 *Biochemistry.* 2005;44(13):4957-70.
- 698 28. Fitch WM, Leiter JM, Li XQ, Palese P. Positive Darwinian evolution in human influenza A  
699 viruses. *Proc Natl Acad Sci U S A.* 1991;88(10):4270-4.
- 700 29. Nelson MI, Simonsen L, Viboud C, Miller MA, Taylor J, George KS, et al. Stochastic processes  
701 are key determinants of short-term evolution in influenza A virus. *PLoS Pathog.* 2006;2(12):e125.
- 702 30. Furuse Y, Suzuki A, Kamigaki T, Oshitani H. Evolution of the M gene of the influenza A virus in  
703 different host species: large-scale sequence analysis. *Virol J.* 2009;6:67.
- 704 31. Gultyaev AP, Fouchier RA, Olsthoorn RC. Influenza virus RNA structure: unique and common  
705 features. *Int Rev Immunol.* 2010;29(6):533-56.
- 706 32. Carrillo-Santisteve P, Ciancio BC, Nicoll A, Lopalco PL. The importance of influenza  
707 prevention for public health. *Hum Vaccin Immunother.* 2012;8(1):89-95.
- 708 33. de Jong JC, Claas EC, Osterhaus AD, Webster RG, Lim WL. A pandemic warning? *Nature.*  
709 1997;389(6651):554.
- 710 34. Garten RJ, Davis CT, Russell CA, Shu B, Lindstrom S, Balish A, et al. Antigenic and genetic  
711 characteristics of swine-origin 2009 A(H1N1) influenza viruses circulating in humans. *Science.*  
712 2009;325(5937):197-201.
- 713 35. Shannon CE, Weaver W. *The mathematical theory of communication.* Urbana,: University of  
714 Illinois Press; 1949. v (i.e. vii), 117 p. p.
- 715 36. Cox NJ, Kitame F, Kendal AP, Maassab HF, Naeve C. Identification of sequence changes in the  
716 cold-adapted, live attenuated influenza vaccine strain, A/Ann Arbor/6/60 (H2N2). *Virology.*  
717 1988;167(2):554-67.
- 718 37. Klimov AI, Cox NJ, Yotov WV, Rocha E, Alexandrova GI, Kendal AP. Sequence changes in the  
719 live attenuated, cold-adapted variants of influenza A/Leningrad/134/57 (H2N2) virus. *Virology.*  
720 1992;186(2):795-7.

- 721 38. Ilyinskii PO, Thoidis G, Shneider AM. Development of a vaccine against pandemic influenza  
722 viruses: current status and perspectives. *Int Rev Immunol*. 2008;27(6):392-426.
- 723 39. Simmonds P, Tuplin A, Evans DJ. Detection of genome-scale ordered RNA structure (GORS) in  
724 genomes of positive-stranded RNA viruses: Implications for virus evolution and host persistence.  
725 *RNA*. 2004;10(9):1337-51.
- 726 40. Aouacheria A, Navratil V, Lopez-Perez R, Gutierrez NC, Churkin A, Barash D, et al. In silico  
727 whole-genome screening for cancer-related single-nucleotide polymorphisms located in human  
728 mRNA untranslated regions. *BMC Genomics*. 2007;8:2.
- 729 41. Shneider AM. Four stages of a scientific discipline; four types of scientist. *Trends Biochem*  
730 *Sci*. 2009;34(5):217-23.
- 731 42. Shapiro BA, Yingling YG, Kasprzak W, Bindewald E. Bridging the gap in RNA structure  
732 prediction. *Curr Opin Struct Biol*. 2007;17(2):157-65.
- 733 43. Marti-Renom MA, Capriotti E. Computational RNA structure prediction. *Current*  
734 *Bioinformatics*. 2008;3(1):32-45.
- 735 44. Chursov A, Walter MC, Schmidt T, Mironov A, Shneider A, Frishman D. Sequence-structure  
736 relationships in yeast mRNAs. *Nucleic Acids Res*. 2012;40(3):956-62.
- 737 45. Deigan KE, Li TW, Mathews DH, Weeks KM. Accurate SHAPE-directed RNA structure  
738 determination. *Proc Natl Acad Sci U S A*. 2009;106(1):97-102.
- 739 46. Mortimer SA, Trapnell C, Aviran S, Pachter L, Lucks JB. SHAPE-Seq: High-Throughput RNA  
740 Structure Analysis. *Curr Protoc Chem Biol*. 2012;4(4):275-97.
- 741 47. Loughrey D, Watters KE, Settle AH, Lucks JB. SHAPE-Seq 2.0: systematic optimization and  
742 extension of high-throughput chemical probing of RNA secondary structure with next generation  
743 sequencing. *Nucleic Acids Res*. 2014;42(21).
- 744 48. Kertesz M, Wan Y, Mazor E, Rinn JL, Nutter RC, Chang HY, et al. Genome-wide measurement  
745 of RNA secondary structure in yeast. *Nature*. 2010;467(7311):103-7.
- 746 49. Ding Y, Tang Y, Kwok CK, Zhang Y, Bevilacqua PC, Assmann SM. In vivo genome-wide profiling  
747 of RNA secondary structure reveals novel regulatory features. *Nature*. 2014;505(7485):696-700.
- 748 50. Ding F, Lavender CA, Weeks KM, Dokholyan NV. Three-dimensional RNA structure  
749 refinement by hydroxyl radical probing. *Nat Methods*. 2012;9(6):603-8.
- 750 51. Cruz JA, Blanchet MF, Boniecki M, Bujnicki JM, Chen SJ, Cao S, et al. RNA-Puzzles: a CASP-like  
751 evaluation of RNA three-dimensional structure prediction. *RNA*. 2012;18(4):610-25.
- 752 52. Miao Z, Adamiak RW, Blanchet MF, Boniecki M, Bujnicki JM, Chen SJ, et al. RNA-Puzzles  
753 Round II: assessment of RNA structure prediction programs applied to three large RNA structures.  
754 *RNA*. 2015;21(6):1066-84.
- 755 53. Tinoco I, Jr., Bustamante C. How RNA folds. *J Mol Biol*. 1999;293(2):271-81.
- 756 54. Laing C, Schlick T. Computational approaches to 3D modeling of RNA. *J Phys Condens*  
757 *Matter*. 2010;22(28):283101.
- 758 55. Laing C, Schlick T. Computational approaches to RNA structure prediction, analysis, and  
759 design. *Curr Opin Struct Biol*. 2011;21(3):306-18.
- 760 56. Leontis NB, Westhof E. Geometric nomenclature and classification of RNA base pairs. *RNA*.  
761 2001;7(4):499-512.
- 762 57. Theis C, Zirbel CL, Zu Siederdisen CH, Anthon C, Hofacker IL, Nielsen H, et al. RNA 3D  
763 Modules in Genome-Wide Predictions of RNA 2D Structure. *PLoS One*. 2015;10(10):e0139900.
- 764 58. Barash D, Churkin A. Mutational analysis in RNAs: comparing programs for RNA deleterious  
765 mutation prediction. *Brief Bioinform*. 2011;12(2):104-14.
- 766 59. Sabarinathan R, Tafer H, Seemann SE, Hofacker IL, Stadler PF, Gorodkin J. RNAsnp: efficient  
767 detection of local RNA secondary structure changes induced by SNPs. *Hum Mutat*. 2013;34(4):546-  
768 56.
- 769 60. Sabarinathan R, Tafer H, Seemann SE, Hofacker IL, Stadler PF, Gorodkin J. The RNAsnp web  
770 server: predicting SNP effects on local RNA secondary structure. *Nucleic Acids Res*. 2013;41(Web  
771 Server issue):W475-9.

- 772 61. Halvorsen M, Martin JS, Broadaway S, Laederach A. Disease-associated mutations that alter  
773 the RNA structural ensemble. *PLoS Genet.* 2010;6(8):e1001074.
- 774 62. Churkin A, Barash D. RNAmute: RNA secondary structure mutation analysis tool. *BMC*  
775 *Bioinformatics.* 2006;7:221.
- 776 63. Churkin A, Gabdank I, Barash D. The RNAmute web server for the mutational analysis of RNA  
777 secondary structures. *Nucleic Acids Res.* 2011;39(Web Server issue):W92-9.
- 778 64. Waldispuhl J, Devadas S, Berger B, Clote P. RNAmutants: a web server to explore the  
779 mutational landscape of RNA secondary structures. *Nucleic Acids Res.* 2009;37(Web Server  
780 issue):W281-6.
- 781 65. Shu W, Bo X, Liu R, Zhao D, Zheng Z, Wang S. RDMAS: a web server for RNA deleterious  
782 mutation analysis. *BMC Bioinformatics.* 2006;7:404.
- 783 66. Vasin AV, Temkina OA, Egorov VV, Klotchenko SA, Plotnikova MA, Kiselev OI. Molecular  
784 mechanisms enhancing the proteome of influenza A viruses: an overview of recently discovered  
785 proteins. *Virus Res.* 2014;185:53-63.
- 786 67. Webster RG, Bean WJ, Gorman OT, Chambers TM, Kawaoka Y. Evolution and ecology of  
787 influenza A viruses. *Microbiol Rev.* 1992;56(1):152-79.
- 788 68. Brower-Sinning R, Carter DM, Crevar CJ, Ghedin E, Ross TM, Benos PV. The role of RNA  
789 folding free energy in the evolution of the polymerase genes of the influenza A virus. *Genome Biol.*  
790 2009;10(2):R18.
- 791 69. Bao Y, Bolotov P, Dernovoy D, Kiryutin B, Zaslavsky L, Tatusova T, et al. The influenza virus  
792 resource at the National Center for Biotechnology Information. *J Virol.* 2008;82(2):596-601.
- 793 70. Lorenz R, Bernhart SH, Honer Zu Siederdisen C, Tafer H, Flamm C, Stadler PF, et al.  
794 ViennaRNA Package 2.0. *Algorithms Mol Biol.* 2011;6:26.
- 795 71. Zuker M. Mfold web server for nucleic acid folding and hybridization prediction. *Nucleic*  
796 *Acids Res.* 2003;31(13):3406-15.
- 797 72. Reed LJ, Muench H. A simple method of estimating fifty per cent endpoints. *Am J Hyg.*  
798 1938;27:493-497

799  
800  
801

## TABLE AND FIGURE LEGENDS

**Table 1:** Numbers of identified structured RNA regions within influenza mRNAs.

| Gene name | Non-pandemic |        |     |        |                                              |                        | Pandemic     |        |     |        |                                                  |                        | Number of <i>in silico</i> SNPs |
|-----------|--------------|--------|-----|--------|----------------------------------------------|------------------------|--------------|--------|-----|--------|--------------------------------------------------|------------------------|---------------------------------|
|           | Total number | Length |     |        | Do not overlap with PSRs in pandemic strains |                        | Total number | Length |     |        | Do not overlap with PSRs in non-pandemic strains |                        |                                 |
|           |              | Min    | Max | Median | Number                                       | Percentage of total, % |              | Min    | Max | Median | Number                                           | Percentage of total, % |                                 |
| PB2       | 23           | 5      | 31  | 7      | 19                                           | 82.6                   | 18           | 5      | 34  | 8.5    | 13                                               | 72.2                   | 7                               |
| PB1       | 15           | 5      | 32  | 7      | 13                                           | 86.7                   | 15           | 5      | 103 | 9      | 13                                               | 86.7                   | 7                               |
| PA        | 20           | 5      | 54  | 8      | 17                                           | 85.0                   | 13           | 5      | 27  | 9      | 10                                               | 76.9                   | 7                               |
| HA        | 11           | 5      | 10  | 9      | 9                                            | 81.8                   | 21           | 5      | 24  | 8      | 19                                               | 90.5                   | 5                               |
| NP        | 28           | 5      | 24  | 9      | 15                                           | 53.6                   | 31           | 5      | 67  | 7      | 17                                               | 54.8                   | 5                               |
| NA        | 7            | 5      | 18  | 10     | 6                                            | 85.7                   | 6            | 7      | 24  | 10.5   | 5                                                | 83.3                   | 5                               |
| M1        | 22           | 5      | 57  | 10     | 10                                           | 45.5                   | 15           | 5      | 30  | 8      | 2                                                | 13.3                   | 2                               |
| M2        | 5            | 7      | 34  | 14     | 2                                            | 40.0                   | 5            | 5      | 43  | 9      | 3                                                | 60.0                   | 1                               |
| NS1       | 8            | 5      | 46  | 22.5   | 6                                            | 75.0                   | 2            | 5      | 26  | 15.5   | 0                                                | 00.0                   | 2                               |
| NS2       | 3            | 7      | 121 | 14     | 0                                            | 00.0                   | 8            | 5      | 48  | 11     | 2                                                | 25.0                   | 1                               |

802

|       |     |   |     |   |    |      |     |   |     |   |    |      |    |
|-------|-----|---|-----|---|----|------|-----|---|-----|---|----|------|----|
| Total | 142 | 5 | 121 | 9 | 97 | 68.3 | 134 | 5 | 103 | 8 | 84 | 62.7 | 42 |
|-------|-----|---|-----|---|----|------|-----|---|-----|---|----|------|----|

| Type         | Gene name | Total length of PSRs | Percentage of mRNA covered by PSRs | Number of nucleotides within structured RNA regions, which changed their probability of being paired to a value outside of the naturally occurring range of probabilities for this position |                    |                                  |                    | P-value |
|--------------|-----------|----------------------|------------------------------------|---------------------------------------------------------------------------------------------------------------------------------------------------------------------------------------------|--------------------|----------------------------------|--------------------|---------|
|              |           |                      |                                    | Mutations in positions that are prone to be mutated                                                                                                                                         |                    | Mutations in conserved positions |                    |         |
|              |           |                      |                                    | Mean                                                                                                                                                                                        | Standard deviation | Mean                             | Standard deviation |         |
| Non-pandemic | PB2       | 257                  | 0.113                              | 18.6                                                                                                                                                                                        | 13.5               | 20.8                             | 14.9               | 0.1395  |
|              | PB1       | 156                  | 0.069                              | 11.4                                                                                                                                                                                        | 10.5               | 11.8                             | 10.4               | 0.3264  |
|              | PA        | 262                  | 0.122                              | 21.8                                                                                                                                                                                        | 20.4               | 24.0                             | 18.8               | 0.064   |
|              | HA        | 85                   | 0.050                              | 5.9                                                                                                                                                                                         | 5.4                | 5.3                              | 5.6                | 0.0813  |
|              | NP        | 300                  | 0.200                              | 24.6                                                                                                                                                                                        | 17.2               | 31.3                             | 17.7               | 0.001   |
|              | NA        | 75                   | 0.053                              | 4.0                                                                                                                                                                                         | 5.1                | 4.4                              | 6.2                | 0.2283  |
|              | M1        | 334                  | 0.440                              | 24.3                                                                                                                                                                                        | 23.3               | 21.1                             | 21.2               | 0.1068  |
|              | M2        | 77                   | 0.262                              | 4.1                                                                                                                                                                                         | 4.7                | 7.0                              | 7.5                | 0.0022  |
|              | NS1       | 183                  | 0.264                              | 9.6                                                                                                                                                                                         | 11.0               | 15.2                             | 15.7               | 0.0008  |
|              | NS2       | 142                  | 0.388                              | 11.4                                                                                                                                                                                        | 19.2               | 12.0                             | 22.8               | 0.0311  |
| ic           | PB2       | 232                  | 0.102                              | 16.7                                                                                                                                                                                        | 14.0               | 16.0                             | 13.0               | 0.2883  |

|  |     |     |       |      |      |      |      |        |
|--|-----|-----|-------|------|------|------|------|--------|
|  | PB1 | 251 | 0.110 | 15.8 | 14.3 | 17.0 | 14.6 | 0.1722 |
|  | PA  | 138 | 0.064 | 12.0 | 10.7 | 12.5 | 10.8 | 0.3317 |
|  | HA  | 205 | 0.121 | 17.5 | 18.0 | 15.9 | 18.5 | 0.0273 |
|  | NP  | 351 | 0.234 | 41.2 | 27.5 | 44.8 | 27.8 | 0.0955 |
|  | NA  | 84  | 0.060 | 4.7  | 6.8  | 5.5  | 7.7  | 0.3006 |
|  | M1  | 174 | 0.229 | 11.1 | 11.8 | 12.0 | 11.1 | 0.0917 |
|  | M2  | 77  | 0.262 | 10.5 | 8.7  | 9.8  | 11.2 | 0.0395 |
|  | NS1 | 31  | 0.047 | 2.8  | 5.7  | 3.3  | 5.7  | 0.1341 |
|  | NS2 | 146 | 0.399 | 10.4 | 14.7 | 21.5 | 28.0 | 0.0007 |

803 **Table 2:** Comparative analysis of the effects on RNA PSRs elicited by *in silico* mutations in frequently vs. rarely mutating positions of H1N1  
 804 influenza mRNAs.

805

806

807 **Table 3:** List of antisense oligonucleotides used to examine influenza viral replication inhibition.

| Name   | Sequence   | Nucleotide position in NS2 mRNA |
|--------|------------|---------------------------------|
| stem   | CAGAGACTCG | 105 -114                        |
| loop   | TATATTTT   | 115-122                         |
| off10  | CTTATTTCT  | 221-230                         |
| rand10 | TATCCACAC  | NA                              |

808

809

810 **Figure 1:** Computationally predicted by mfold 3.6 (71) (a) optimal and (b) one of many suboptimal secondary structures of tRNA. Mfold was  
 811 used with the default energy parameters including the folding temperature fixed at 37°C. Despite the fact that the left structure contains more  
 812 base pairs, the right structure is functional and evolutionarily conserved.

813

814 **Figure 2:** Structure variability and mutability profiles for non-pandemic ((a), (b), and (c)) and pandemic ((d), (e), and (f)) NS2 influenza mRNAs.  
 815 Plots (a) and (d) demonstrate structure conservation profiles; namely, they show the moving average that was calculated by applying a sliding  
 816 window approach to smooth individual fluctuations of standard deviations of nucleotide base pairing probabilities. The blue solid line  
 817 demonstrates the mean level of all moving average values, and the blue dashed line demonstrates the level equal to the mean of all moving  
 818 average values decreased by the standard deviation of all moving average values. In this case, the mean and the standard deviation were  
 819 computed based on all moving average values from all mRNAs of a particular type (pandemic or non-pandemic) of influenza strains. According  
 820 to our definition, when the moving average goes below the blue dashed line, it is a structured RNA region. Such regions are colored with either  
 821 yellow or green across the plots. Plots (b) and (e) demonstrate profiles of the mean values of probabilities of nucleotide positions to be in a  
 822 double-stranded conformation. If this value is close to 1, it means that in most strains in the dataset the correspondent nucleotide has a very  
 823 high probability to be paired; and, if this value is close to 0, the correspondent nucleotide is very likely to be unpaired in most strains in the  
 824 dataset. Plots (c) and (f) demonstrate mutability profiles for NS2 mRNAs. Mutability of every nucleotide position is computed as a value of  
 825 Shannon entropy which is calculated based on frequency of every ribonucleotide in a particular position. Areas within RNA colored with yellow  
 826 or green demonstrate identified structured RNA regions. Meanwhile, areas colored with green show regions in which particular secondary  
 827 structure was determined.

828

829 **Figure 3:** Secondary structural elements identified in the NS2 mRNA of H1N1 influenza A virus. These structural elements are evolutionarily  
830 conserved among analyzed strains. Hairpin at plot (b) was identified in both non-pandemic and pandemic H1N1 influenza. Structure shown at  
831 plot (a) exists in non-pandemic influenza virus, while pandemic mRNAs contain only part of that structure covered by nucleotide positions 40 to  
832 73.

833

834 **Figure 4:** Influenza viral replication inhibition effect of antisense oligonucleotides, 24 hours post infection. P-value for the comparison between  
835 “Stem” and “Flu” is 0.0043 and is the only statistically significant difference.

836



a.

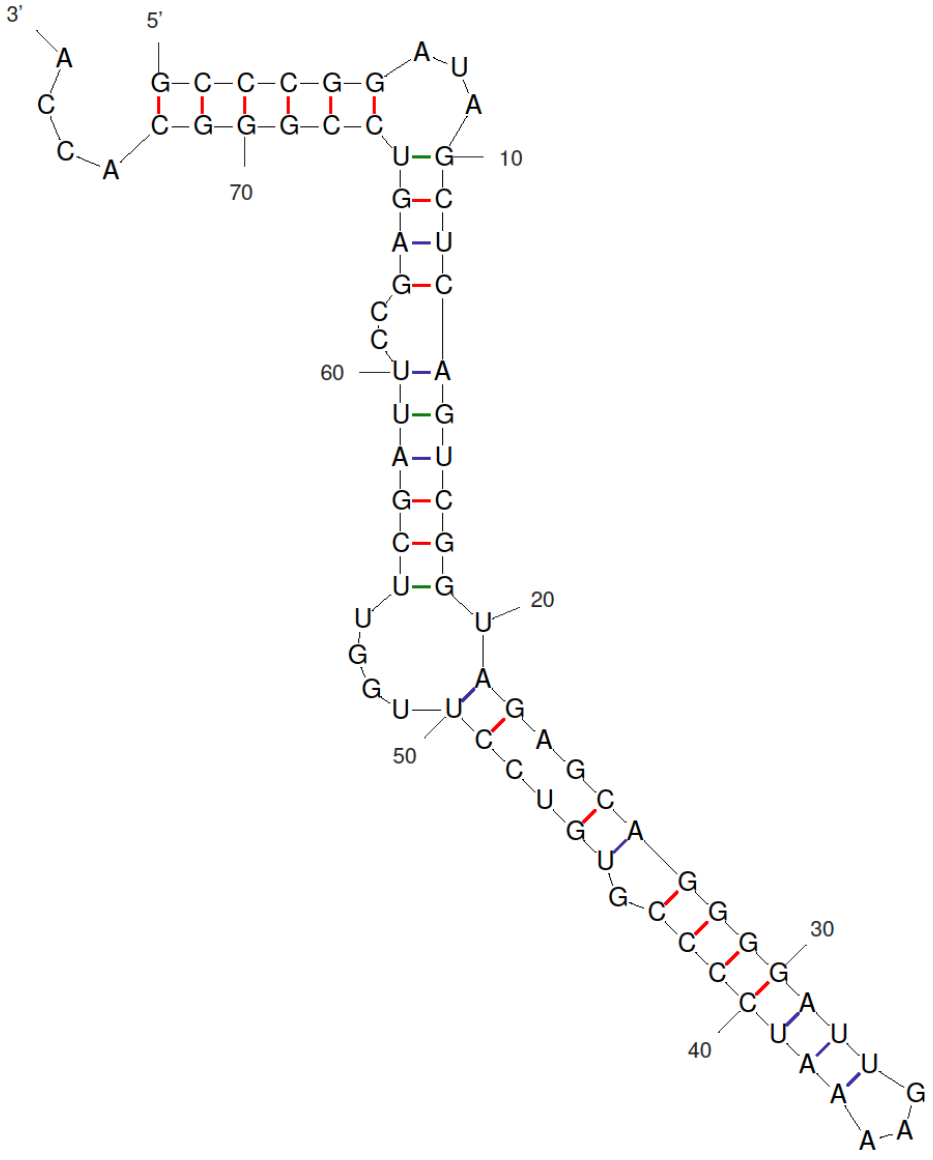

dG = -33.60

b.

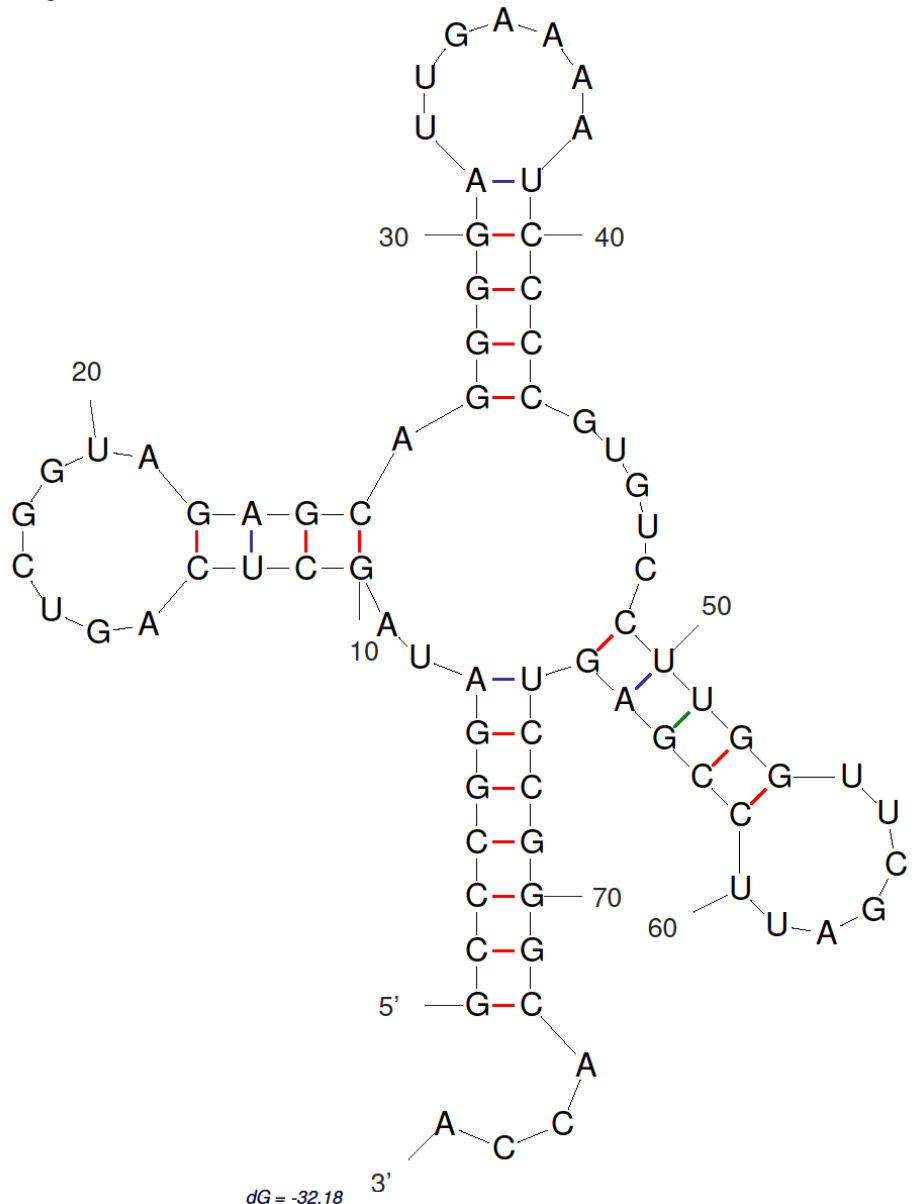

dG = -32.18

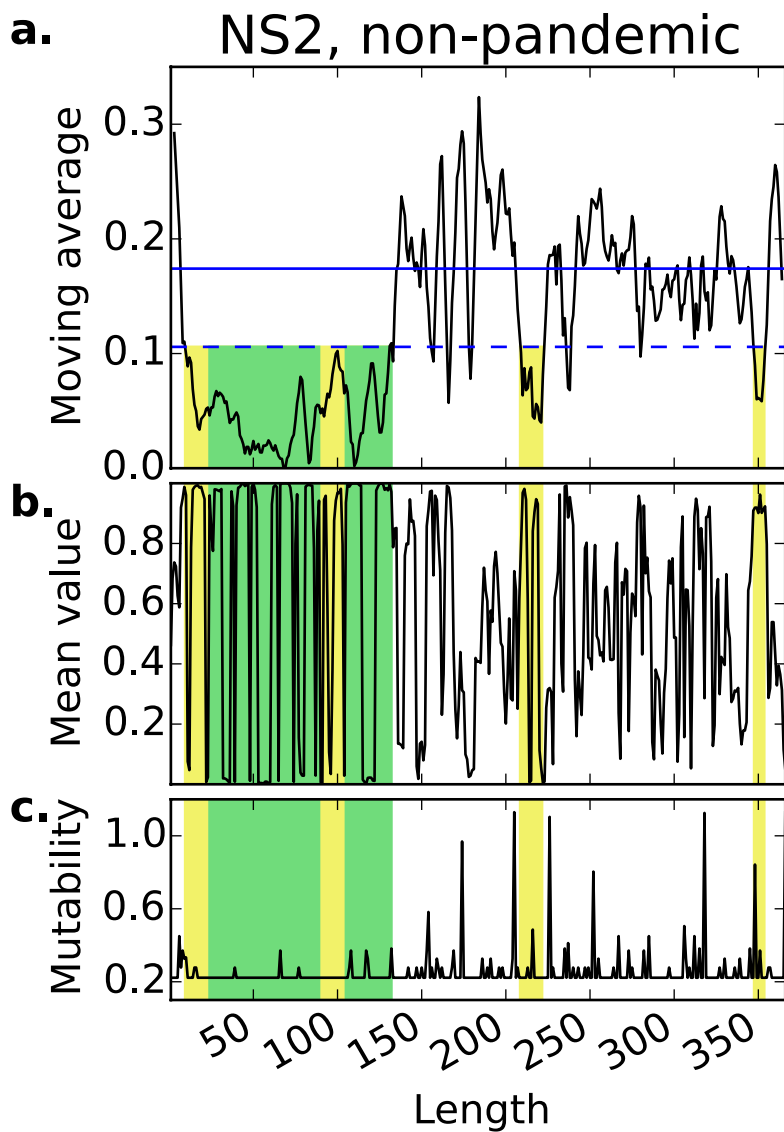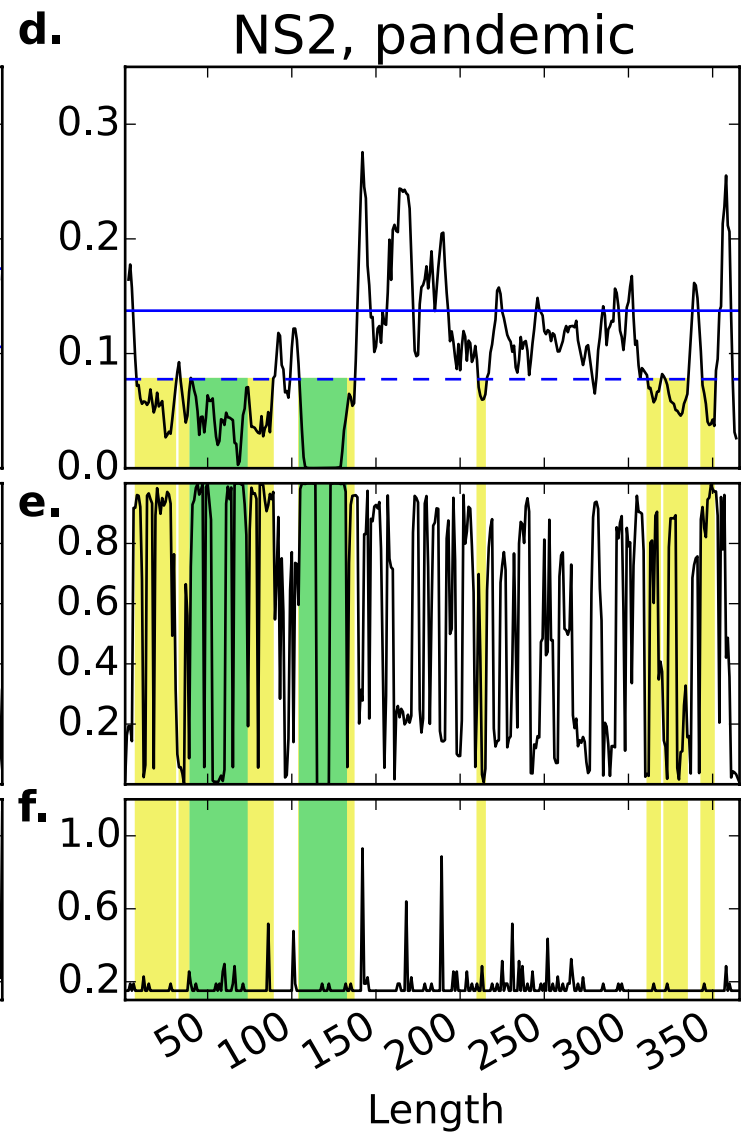

a.

... AGCUUUCAGGACAUAUAUGAGGAUGUCAAAAUGCAAUUGGGGUCCUCAUCGGGGGACUUGAAUGGAA ...

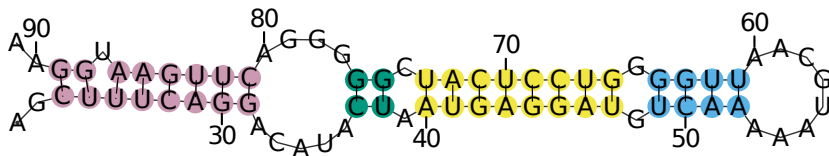

b.

... UUCGAGUCUCUGAAAAUAUACAGAGAUUCGCU ...

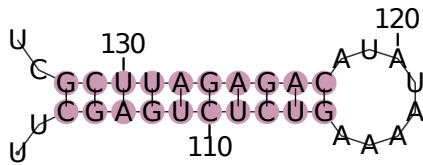

Relative viral NP-protein level (%)

110  
105  
100  
95  
90  
85  
80  
75

Flu

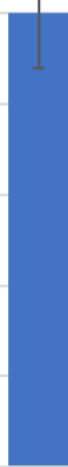

Rand10

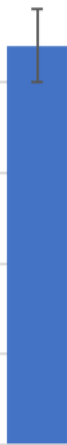

Off10

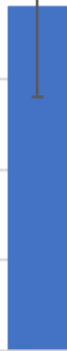

Loop

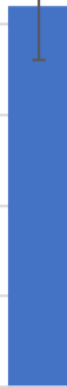

Stem

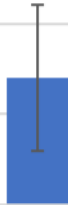

Source: https://www.biorxiv.org/content/biorxiv/early/2018/12/13/494336.full.pdf
