# Supplementary material for: Novel Computational Method to Define RNA PSRs Explains Influenza A Virus Nucleotide Conservation
Source: bioRxiv or medRxiv preprint supplement (doi:10.1101/494336), 2018-12-13

## Supplementary Material

**Supplementary Table 1:** Length of coding region and numbers of highly mutable and conserved positions identified in every influenza mRNA.

| Gene name | Non-pandemic         |                        |                          |                               |                               |                                 | Pandemic             |                        |                          |                               |                               |                                 |
|-----------|----------------------|------------------------|--------------------------|-------------------------------|-------------------------------|---------------------------------|----------------------|------------------------|--------------------------|-------------------------------|-------------------------------|---------------------------------|
|           | Coding region length | Non-mutating positions | Highly mutable positions |                               | Mutable third codon positions |                                 | Coding region length | Non-mutating positions | Highly mutable positions |                               | Mutable third codon positions |                                 |
|           |                      |                        | Number                   | Percentage of total length, % | Number                        | Percentage of highly mutable, % |                      |                        | Number                   | Percentage of total length, % | Number                        | Percentage of highly mutable, % |
| PB2       | 2280                 | 1763                   | 262                      | 11.5                          | 211                           | 80.5                            | 2280                 | 1717                   | 289                      | 12.7                          | 232                           | 80.3                            |
| PB1       | 2274                 | 1762                   | 277                      | 12.2                          | 237                           | 85.6                            | 2274                 | 1679                   | 286                      | 12.6                          | 226                           | 79.0                            |
| PA        | 2151                 | 1682                   | 244                      | 11.3                          | 207                           | 84.8                            | 2151                 | 1583                   | 266                      | 12.4                          | 209                           | 78.6                            |
| HA        | 1698                 | 1254                   | 241                      | 14.2                          | 173                           | 71.8                            | 1701                 | 1164                   | 269                      | 15.8                          | 179                           | 66.5                            |
| NP        | 1497                 | 1187                   | 164                      | 11.0                          | 145                           | 88.4                            | 1497                 | 1180                   | 150                      | 10.0                          | 125                           | 83.3                            |
| NA        | 1413                 | 1008                   | 219                      | 15.5                          | 154                           | 70.3                            | 1410                 | 1000                   | 201                      | 14.3                          | 128                           | 63.7                            |
| M1        | 759                  | 635                    | 60                       | 7.9                           | 51                            | 85.0                            | 759                  | 606                    | 67                       | 8.8                           | 57                            | 85.1                            |
| M2        | 294                  | 232                    | 28                       | 9.5                           | 18                            | 64.3                            | 294                  | 230                    | 20                       | 6.8                           | 10                            | 50.0                            |
| NS1       | 693                  | 515                    | 82                       | 11.8                          | 46                            | 56.1                            | 660                  | 467                    | 82                       | 12.4                          | 44                            | 53.7                            |
| NS2       | 366                  | 296                    | 38                       | 10.4                          | 28                            | 73.7                            | 366                  | 297                    | 27                       | 7.4                           | 18                            | 66.7                            |

**Supplementary Table 2:** Non-pandemic and pandemic H1N1 influenza A strains used for the analysis.

| #  | Non-pandemic                | Pandemic                    |
|----|-----------------------------|-----------------------------|
| 1  | A/England/192/2000          | A/Minneapolis/INS3_675/2012 |
| 2  | A/California/VRDL209/2009   | A/Helsinki/720M/2014        |
| 3  | A/Alabama/UR06-0455/2007    | A/Aalborg/INS132/2009       |
| 4  | A/Arkansas/WRAIR1249P/2009  | A/Aarhus/INS254/2009        |
| 5  | A/Auckland/579/2000         | A/Aarhus/INS3_653/2011      |
| 6  | A/Auckland/580/2000         | A/Aarhus/INS3_654/2011      |
| 7  | A/Auckland/605/2001         | A/Aarhus/INS609/2011        |
| 8  | A/Auckland/619/2005         | A/Aarhus/INS612/2011        |
| 9  | A/Boston/1/2009             | A/Alabama/01/2010           |
| 10 | A/Boston/10/2009            | A/Alaska/38/2009            |
| 11 | A/Boston/12/2007            | A/Arizona/20/2009           |
| 12 | A/Boston/23/2009            | A/Athens/INS163/2009        |
| 13 | A/Boston/34/2008            | A/Athens/INS271/2009        |
| 14 | A/Boston/46/2009            | A/Athens/INS345/2009        |
| 15 | A/Boston/49/2008            | A/Athens/INS398/2010        |
| 16 | A/Boston/6/2009             | A/Athens/INS412/2010        |
| 17 | A/Boston/67/2009            | A/Athens/INS416/2010        |
| 18 | A/Boston/93/2009            | A/Athens/INS571/2011        |
| 19 | A/California/UR06-0125/2007 | A/Bangkok/INS3_681/2012     |
| 20 | A/California/UR06-0393/2007 | A/Bangkok/INS424/2010       |
| 21 | A/California/VRDL134/2009   | A/Bangkok/INS425/2010       |
| 22 | A/California/VRDL151/2009   | A/Bangkok/INS478/2010       |
| 23 | A/California/VRDL152/2009   | A/Bangkok/INS481/2010       |
| 24 | A/California/VRDL175/2009   | A/Bangkok/INS490/2010       |
| 25 | A/California/VRDL191/2009   | A/Bangkok/INS505/2010       |
| 26 | A/California/VRDL193/2009   | A/Bangkok/INS511/2010       |
| 27 | A/California/VRDL252/2009   | A/Bogota/WRAIR0435N/2009    |

|    |                           |                                       |
|----|---------------------------|---------------------------------------|
| 28 | A/California/VRDL256/2009 | A/Boston/685/2009                     |
| 29 | A/Canada/591/2004         | A/Boston/DOA08/2011                   |
| 30 | A/Canterbury/01/2001      | A/Boston/DOA14/2011                   |
| 31 | A/Canterbury/126/2001     | A/Boston/DOA2-099/2012                |
| 32 | A/Canterbury/27/2000      | A/Boston/DOA40/2011                   |
| 33 | A/Chile/8885/2001         | A/Boston/DOA90/2012                   |
| 34 | A/Christchurch/1/2003     | A/Boston/YGA_00037/2013               |
| 35 | A/Colorado/UR06-0053/2007 | A/Boston/YGA_01185/2013               |
| 36 | A/DaNang/DN238/2008       | A/Boston/YGA_01217/2013               |
| 37 | A/DaNang/DN345/2008       | A/Brooklyn/INS549/2011                |
| 38 | A/DaNang/DN431/2008       | A/California/VRDL107/2009             |
| 39 | A/England/493/2006        | A/California/VRDL4/2010               |
| 40 | A/England/494/2006        | A/California/VRDL81/2009              |
| 41 | A/England/545/2007        | A/California/WR1316P/2009             |
| 42 | A/England/593/2006        | A/Cambridge/INS528/2010               |
| 43 | A/Florida/UR06-0208/2007  | A/Changchun/01/2009                   |
| 44 | A/Florida/UR07-0022/2008  | A/Chicago/YGA_04019/2012              |
| 45 | A/HaNoi/Q421/2006         | A/Chile/115/2010                      |
| 46 | A/HaNoi/TX200/2008        | A/Chile/6/2010                        |
| 47 | A/Hanoi/ISBM31/2005       | A/Darlinghurst/INS3_643/2011          |
| 48 | A/Hong Kong/1870/2008     | A/District of Columbia/INS525/2010    |
| 49 | A/Hue/H386/2008           | A/District of Columbia/INS600/2011    |
| 50 | A/Illinois/UR06-0146/2007 | A/District of Columbia/WRAIRO313/2011 |
| 51 | A/Johannesburg/159/1997   | A/England/05120538/2010               |
| 52 | A/Kentucky/UR06-0057/2007 | A/England/280/2010                    |
| 53 | A/Kentucky/UR06-0539/2007 | A/England/859/2009                    |
| 54 | A/Kentucky/UR07-0061/2008 | A/Finland/102/2014                    |
| 55 | A/Kyoto/08K056/2009       | A/Finland/1520N/2011                  |
| 56 | A/Malaysia/11641/1997     | A/Finland/30/2014                     |

|    |                              |                          |
|----|------------------------------|--------------------------|
| 57 | A/Malaysia/14075/2000        | A/Finland/61/2014        |
| 58 | A/Malaysia/15042/1998        | A/Gainesville/05/2014    |
| 59 | A/Malaysia/1686034/2006      | A/Georgia/T51700/2012    |
| 60 | A/Malaysia/1706215/2007      | A/Guangzhou/GIRD74/2010  |
| 61 | A/Malaysia/1798564/2007      | A/Gunma/267/2009         |
| 62 | A/Malaysia/2143035/2009      | A/Gunma/287/2009         |
| 63 | A/Malaysia/30025/2004        | A/Hamburg/INS92/2009     |
| 64 | A/Malaysia/32110/2005        | A/Helsinki/100/2013      |
| 65 | A/Malaysia/33132/2005        | A/Helsinki/1127/2014     |
| 66 | A/Malaysia/34450/2006        | A/Helsinki/11IH2213/2011 |
| 67 | A/Malaysia/35164/2006        | A/Helsinki/1289/2013     |
| 68 | A/Managua/1038.01/2008       | A/Helsinki/147/2013      |
| 69 | A/Managua/107.01/2008        | A/Helsinki/220M/2014     |
| 70 | A/Managua/2055.01/2008       | A/Helsinki/2430/2012     |
| 71 | A/Managua/254.01/2008        | A/Helsinki/39/2013       |
| 72 | A/Managua/3153.01/2008       | A/Helsinki/473N/2014     |
| 73 | A/Managua/3759.02/2008       | A/Helsinki/490/2013      |
| 74 | A/Memphis/1/2001             | A/Helsinki/771M/2014     |
| 75 | A/Memphis/15/2000            | A/Houston/JMM_131/2013   |
| 76 | A/Memphis/6/2001             | A/Hubei/75/2009          |
| 77 | A/Memphis/7/2001             | A/Hubei/76/2009          |
| 78 | A/Mississippi/UR06-0378/2007 | A/India/Nag132467/2013   |
| 79 | A/Nagasaki/07N035/2008       | A/India/Nsk12388/2012    |
| 80 | A/Nanchang/11/1996           | A/India/P1112874/2011    |
| 81 | A/Nanchang/16A/1999          | A/India/P1114854/2011    |
| 82 | A/Nanchang/8/1996            | A/India/P121773/2012     |
| 83 | A/New Caledonia/20-JY2/1999  | A/India/P121778/2012     |
| 84 | A/New South Wales/26/2000    | A/India/P12946/2012      |
| 85 | A/New York/08-1253/2008      | A/India/P131027/2013     |

|     |                             |                               |
|-----|-----------------------------|-------------------------------|
| 86  | A/New York/1062/2007        | A/India/P131845/2013          |
| 87  | A/New York/1104/2008        | A/India/P132194/2013          |
| 88  | A/New York/1159/2009        | A/Iowa/04/2010                |
| 89  | A/New York/1692/2009        | A/Jiangsu/1/2009              |
| 90  | A/New York/205/2001         | A/Kazan/CRIE-02/2013          |
| 91  | A/New York/281/2001         | A/Khon Kaen/INS3_649/2012     |
| 92  | A/New York/306/2001         | A/Liaoning/1/2009             |
| 93  | A/New York/442/2001         | A/Lima/INS3_671/2012          |
| 94  | A/New York/494/2002         | A/Lima/WRAIR0672F/2009        |
| 95  | A/New York/UR06-0199/2007   | A/Managua/0305_10/2010        |
| 96  | A/Shanghai/2/1997           | A/Managua/1244.01/2009        |
| 97  | A/Singapore/14/2001         | A/Managua/3246.01/2010        |
| 98  | A/South Australia/58/2005   | A/Melbourne/INS471/2010       |
| 99  | A/St. Petersburg/8/2006     | A/Mexico/InDRECTRLA/2010      |
| 100 | A/Taiwan/123/2002           | A/Moscow/WRAIR1627T/2009      |
| 101 | A/Taiwan/5072/1999          | A/Nepal/VIROAF5/2012          |
| 102 | A/Tennessee/UR06-0080/2007  | A/New York/2372/2010          |
| 103 | A/Texas/UR06-0026/2007      | A/New York/3230/2010          |
| 104 | A/Thailand/CU-B589/2009     | A/New York/6530/2010          |
| 105 | A/Thailand/CU-H223/2009     | A/New York/7480/2010          |
| 106 | A/Waikato/11/2005           | A/New York/INS150/2009        |
| 107 | A/Western Australia/18/2001 | A/New York/WC-LVD-13-001/2013 |
| 108 |                             | A/New York/WC-LVD-13-007/2013 |
| 109 |                             | A/New York/WC-LVD-13-028/2013 |
| 110 |                             | A/New York/WC-LVD-14-001/2014 |
| 111 |                             | A/New York/WC-LVD-14-027/2014 |
| 112 |                             | A/New York/WC-LVD-14-034/2014 |
| 113 |                             | A/New York/WC-LVD-14-044/2014 |
| 114 |                             | A/New York/WC-LVD-14-058/2014 |

|     |  |                                  |
|-----|--|----------------------------------|
| 115 |  | A/Nicaragua/4136_07/2013         |
| 116 |  | A/Nicaragua/4211_07/2013         |
| 117 |  | A/Nicaragua/6123_01/2011         |
| 118 |  | A/Nicaragua/6263_05/2013         |
| 119 |  | A/Nicaragua/AGA2-52/2011         |
| 120 |  | A/North Carolina/05/2010         |
| 121 |  | A/North Fitzroy/INS464/2010      |
| 122 |  | A/Northern Ireland/04380108/2010 |
| 123 |  | A/Novosibirsk/KSH/2011           |
| 124 |  | A/Odense/INS143/2009             |
| 125 |  | A/Ontario/720545/2010            |
| 126 |  | A/Quito/WRAIR0617N/2009          |
| 127 |  | A/San Diego/INS101/2009          |
| 128 |  | A/San Diego/INS105/2009          |
| 129 |  | A/Santiago/p13d2/2013            |
| 130 |  | A/Santiago/p15d1/2011            |
| 131 |  | A/Santiago/p18d0/2013            |
| 132 |  | A/Santiago/p9d1/2011             |
| 133 |  | A/Singapore/EN193/2010           |
| 134 |  | A/Singapore/GP10/2010            |
| 135 |  | A/Singapore/GP3839/2009          |
| 136 |  | A/Singapore/GP413/2010           |
| 137 |  | A/Singapore/GP4406/2010          |
| 138 |  | A/Singapore/GP489/2010           |
| 139 |  | A/Singapore/GP496/2011           |
| 140 |  | A/Singapore/GP868/2011           |
| 141 |  | A/Singapore/GP908/2011           |

|     |  |                             |
|-----|--|-----------------------------|
| 142 |  | A/Singapore/ON2136/2009     |
| 143 |  | A/Singapore/SS34/2010       |
| 144 |  | A/Singapore/TT157/2011      |
| 145 |  | A/Sydney/DD3-10/2010        |
| 146 |  | A/Sydney/DD3-11/2010        |
| 147 |  | A/Sydney/DD3-27/2010        |
| 148 |  | A/Sydney/DD3-37/2010        |
| 149 |  | A/Tallinn/INS182/2010       |
| 150 |  | A/Tennessee/F1093A/2010     |
| 151 |  | A/Texas/JMS393/2009         |
| 152 |  | A/Thailand/CU-B2357/2010    |
| 153 |  | A/Thailand/CU-H2176/2010    |
| 154 |  | A/Thailand/H1255/2010       |
| 155 |  | A/Uganda/MUWRP-059/2009     |
| 156 |  | A/Uganda/MUWRP-102/2009     |
| 157 |  | A/Uganda/MUWRP-176/2010     |
| 158 |  | A/Uganda/MUWRP-212/2010     |
| 159 |  | A/Uganda/MUWRP-224/2010     |
| 160 |  | A/Uganda/MUWRP-240/2011     |
| 161 |  | A/Utah/02/2010              |
| 162 |  | A/Viet Nam/11032010/2009    |
| 163 |  | A/Viet Nam/15032004/2009    |
| 164 |  | A/Warsaw/INS312/2009        |
| 165 |  | A/Warsaw/INS3_657/2011      |
| 166 |  | A/Wisconsin/629-D00134/2009 |
| 167 |  | A/Wisconsin/629-D02424/2009 |
| 168 |  | A/Wurzburg/INS382/2009      |

|     |  |                          |
|-----|--|--------------------------|
| 169 |  | A/Yaroslavl/IIV-196/2009 |
| 170 |  | A/Zhejiang/3/2009        |
| 171 |  | A/Zhejiang/88/2009       |
| 172 |  | A/Zhejiang/X1/2009       |
| 173 |  | A/Zhejiang/X2/2009       |



**Supplementary Table 3:** Coordinates of identified structured RNA regions.

| Gene Name | Non-pandemic   |              | Pandemic       |              |
|-----------|----------------|--------------|----------------|--------------|
|           | Start Position | End Position | Start Position | End Position |
| M1        | 8              | 12           | 59             | 63           |
|           | 26             | 30           | 113            | 117          |
|           | 50             | 55           | 138            | 156          |
|           | 57             | 63           | 185            | 214          |
|           | 89             | 93           | 247            | 254          |
|           | 112            | 142          | 284            | 293          |
|           | 149            | 189          | 361            | 366          |
|           | 208            | 217          | 372            | 379          |
|           | 232            | 288          | 449            | 454          |
|           | 320            | 337          | 512            | 518          |
|           | 340            | 344          | 520            | 531          |
|           | 350            | 367          | 535            | 540          |
|           | 371            | 393          | 610            | 628          |
|           | 397            | 410          | 678            | 699          |
|           | 492            | 503          | 707            | 717          |
|           | 512            | 520          |                |              |
|           | 539            | 547          |                |              |
|           | 610            | 614          |                |              |
|           | 620            | 628          |                |              |
|           | 646            | 660          |                |              |
| 667       | 676            |              |                |              |
| 678       | 697            |              |                |              |
| M2        | 2              | 8            | 59             | 72           |
|           | 17             | 50           | 148            | 153          |
|           | 187            | 200          | 184            | 192          |

|     |      |      |      |      |
|-----|------|------|------|------|
|     | 237  | 251  | 223  | 227  |
|     | 258  | 264  | 236  | 278  |
| NS1 | 198  | 220  | 537  | 541  |
|     | 270  | 298  | 577  | 602  |
|     | 337  | 343  |      |      |
|     | 377  | 412  |      |      |
|     | 439  | 443  |      |      |
|     | 469  | 483  |      |      |
|     | 505  | 550  |      |      |
|     | 563  | 584  |      |      |
| NS2 | 9    | 129  | 7    | 30   |
|     | 208  | 221  | 33   | 38   |
|     | 347  | 353  | 40   | 87   |
|     |      |      | 104  | 136  |
|     |      |      | 210  | 214  |
|     |      |      | 311  | 318  |
|     |      |      | 321  | 334  |
|     |      |      | 343  | 350  |
| PA  | 262  | 273  | 99   | 125  |
|     | 278  | 286  | 147  | 152  |
|     | 307  | 317  | 312  | 318  |
|     | 513  | 517  | 407  | 415  |
|     | 855  | 868  | 914  | 930  |
|     | 874  | 885  | 953  | 959  |
|     | 1321 | 1326 | 967  | 976  |
|     | 1332 | 1338 | 989  | 1002 |
|     | 1384 | 1388 | 1004 | 1011 |
|     | 1471 | 1480 | 1113 | 1117 |

|    |      |      |      |      |
|----|------|------|------|------|
|    | 1551 | 1556 | 1549 | 1556 |
|    | 1575 | 1579 | 1832 | 1842 |
|    | 1682 | 1699 | 2047 | 2055 |
|    | 1728 | 1764 |      |      |
|    | 1797 | 1801 |      |      |
|    | 1818 | 1822 |      |      |
|    | 1824 | 1852 |      |      |
|    | 1892 | 1896 |      |      |
|    | 1944 | 1950 |      |      |
|    | 2061 | 2114 |      |      |
| NP | 3    | 7    | 100  | 166  |
|    | 72   | 83   | 183  | 187  |
|    | 187  | 210  | 200  | 213  |
|    | 224  | 230  | 225  | 234  |
|    | 244  | 248  | 241  | 247  |
|    | 262  | 267  | 264  | 276  |
|    | 284  | 288  | 323  | 344  |
|    | 290  | 297  | 369  | 374  |
|    | 325  | 329  | 384  | 389  |
|    | 369  | 377  | 434  | 439  |
|    | 419  | 423  | 504  | 508  |
|    | 452  | 463  | 512  | 520  |
|    | 637  | 656  | 539  | 543  |
|    | 662  | 666  | 588  | 592  |
|    | 680  | 688  | 672  | 678  |
|    | 740  | 745  | 736  | 743  |
|    | 751  | 760  | 769  | 777  |
|    | 762  | 767  | 808  | 815  |
|    | 1034 | 1038 | 824  | 832  |

|     |      |      |      |      |
|-----|------|------|------|------|
|     | 1053 | 1069 | 1048 | 1057 |
|     | 1072 | 1087 | 1071 | 1076 |
|     | 1090 | 1101 | 1183 | 1187 |
|     | 1127 | 1139 | 1218 | 1222 |
|     | 1189 | 1202 | 1310 | 1314 |
|     | 1329 | 1344 | 1324 | 1340 |
|     | 1423 | 1438 | 1368 | 1372 |
|     | 1443 | 1451 | 1384 | 1392 |
|     | 1460 | 1482 | 1396 | 1400 |
|     |      |      | 1408 | 1440 |
|     |      |      | 1444 | 1450 |
|     |      |      | 1461 | 1483 |
|     | 45   | 51   | 67   | 169  |
|     | 314  | 332  | 552  | 563  |
|     | 338  | 349  | 579  | 598  |
|     | 351  | 356  | 707  | 713  |
|     | 412  | 416  | 812  | 825  |
|     | 550  | 561  | 854  | 858  |
|     | 606  | 611  | 1067 | 1071 |
|     | 619  | 632  | 1229 | 1241 |
|     | 1066 | 1071 | 1288 | 1296 |
|     | 1151 | 1159 | 1326 | 1330 |
|     | 1386 | 1417 | 1482 | 1489 |
|     | 1429 | 1433 | 1498 | 1519 |
|     | 1592 | 1598 | 1861 | 1865 |
|     | 1947 | 1951 | 2020 | 2035 |
|     | 1956 | 1966 | 2048 | 2054 |
| PB1 |      |      |      |      |
|     | 6    | 12   | 8    | 14   |
| PB2 | 38   | 55   | 200  | 233  |

|    |      |      |      |      |
|----|------|------|------|------|
|    | 95   | 99   | 464  | 476  |
|    | 121  | 126  | 501  | 505  |
|    | 281  | 286  | 788  | 794  |
|    | 361  | 365  | 962  | 967  |
|    | 372  | 378  | 1102 | 1124 |
|    | 384  | 390  | 1450 | 1454 |
|    | 417  | 422  | 1456 | 1465 |
|    | 594  | 599  | 1498 | 1521 |
|    | 779  | 789  | 1534 | 1555 |
|    | 843  | 873  | 1618 | 1622 |
|    | 909  | 922  | 1666 | 1676 |
|    | 929  | 949  | 1682 | 1688 |
|    | 978  | 986  | 1694 | 1708 |
|    | 988  | 993  | 1844 | 1848 |
|    | 998  | 1006 | 1938 | 1964 |
|    | 1233 | 1239 | 2048 | 2053 |
|    | 1443 | 1473 |      |      |
|    | 1844 | 1848 |      |      |
|    | 1973 | 1977 |      |      |
|    | 2014 | 2040 |      |      |
|    | 2113 | 2120 |      |      |
| HA | 349  | 353  | 135  | 140  |
|    | 367  | 371  | 224  | 228  |
|    | 559  | 564  | 470  | 482  |
|    | 645  | 653  | 703  | 707  |
|    | 1048 | 1056 | 767  | 772  |
|    | 1065 | 1074 | 898  | 905  |
|    | 1120 | 1124 | 943  | 954  |
|    | 1141 | 1147 | 966  | 981  |

|    |      |      |      |      |
|----|------|------|------|------|
|    | 1200 | 1208 | 1090 | 1094 |
|    | 1266 | 1275 | 1140 | 1144 |
|    | 1601 | 1610 | 1174 | 1185 |
|    |      |      | 1217 | 1222 |
|    |      |      | 1224 | 1243 |
|    |      |      | 1255 | 1278 |
|    |      |      | 1280 | 1288 |
|    |      |      | 1291 | 1300 |
|    |      |      | 1303 | 1307 |
|    |      |      | 1313 | 1320 |
|    |      |      | 1328 | 1346 |
|    |      |      | 1570 | 1574 |
|    |      |      | 1661 | 1666 |
| NA | 63   | 77   | 13   | 23   |
|    | 83   | 92   | 564  | 585  |
|    | 97   | 102  | 590  | 596  |
|    | 550  | 561  | 1047 | 1056 |
|    | 564  | 568  | 1064 | 1073 |
|    | 643  | 660  | 1268 | 1291 |
|    | 1226 | 1234 |      |      |

**Supplementary Table 4:** Pearson correlation coefficients between the mutability value (i.e. Shannon entropy) for every nucleotide position and corresponding value of moving average of individual standard deviations of the base-pairing probabilities of nucleotides. The p-value column shows the measure of statistical significance of the corresponding correlation coefficient.

|                     | <b>Gene Name</b> | <b>Correlation Coefficient</b> | <b>P-value</b> |
|---------------------|------------------|--------------------------------|----------------|
| <b>Non pandemic</b> | PB2              | 0.120                          | 8.86E-009      |
|                     | PB1              | 0.102                          | 1.20E-006      |
|                     | PA               | 0.106                          | 7.85E-007      |
|                     | HA               | 0.103                          | 2.04E-005      |
|                     | NP               | 0.118                          | 5.16E-006      |
|                     | NA               | 0.067                          | 0.0118         |
|                     | M1               | 0.081                          | 0.0265         |
|                     | M2               | 0.140                          | 0.0171         |
|                     | NS1              | 0.110                          | 3.97E-003      |
|                     | NS2              | 0.129                          | 0.0143         |
| <b>Pandemic</b>     | PB2              | 0.123                          | 3.63E-009      |
|                     | PB1              | 0.095                          | 5.91E-006      |
|                     | PA               | 0.059                          | 6.35E-003      |
|                     | HA               | 0.098                          | 5.73E-005      |
|                     | NP               | 0.149                          | 7.76E-009      |
|                     | NA               | 0.090                          | 7.44E-004      |
|                     | M1               | 0.074                          | 0.0423         |
|                     | M2               | 0.006                          | 0.9240         |
|                     | NS1              | 0.155                          | 7.01E-005      |
|                     | NS2              | 0.222                          | 2.02E-005      |

**Supplementary Figure 1:** Number of non-pandemic and pandemic influenza strains left after filtering very similar sequences depending on the identity threshold.

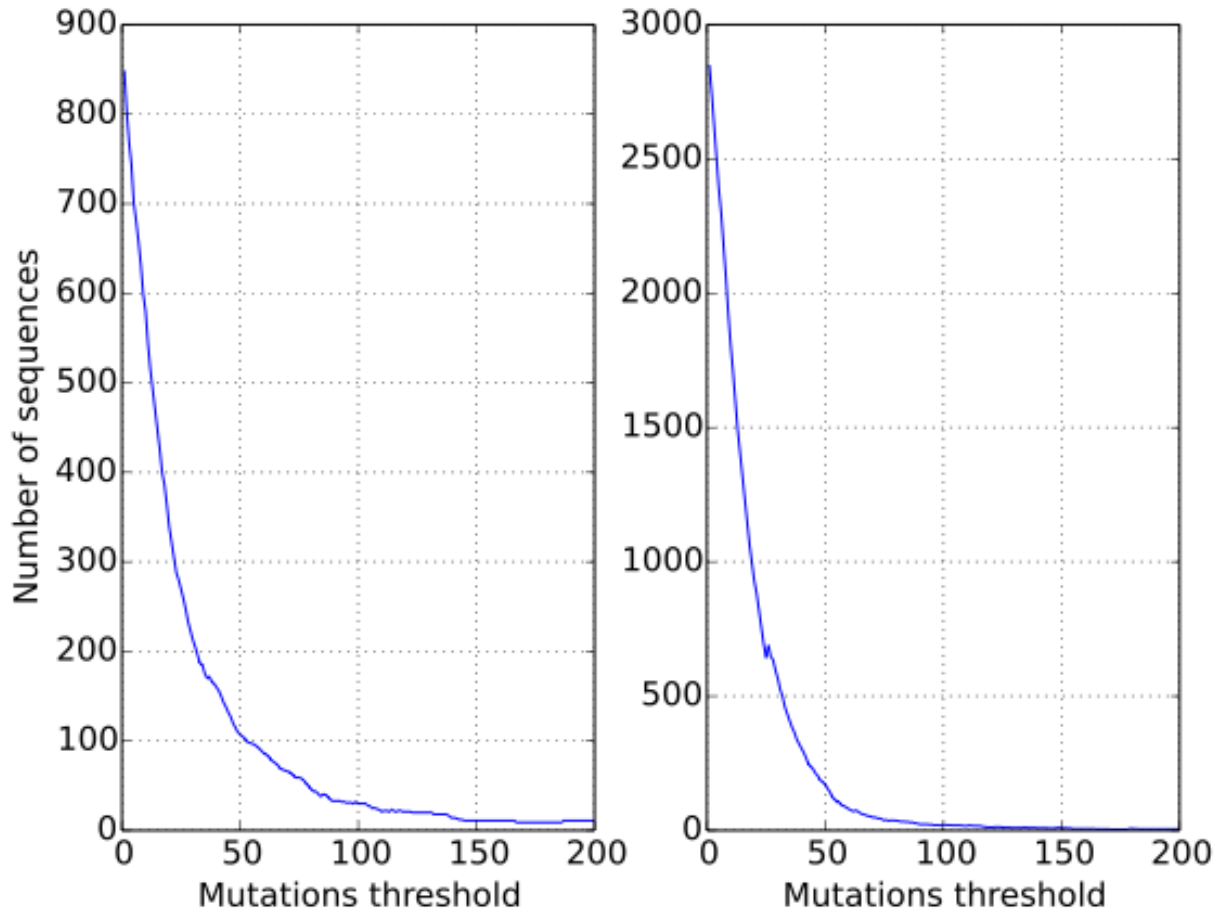



**Supplementary Figures 2-38:** Structure variability and mutability profiles for non-pandemic (a, b, and c) and pandemic (d, e, and f) influenza mRNAs. Plots a and d demonstrate structure conservation profiles; namely, they show the moving average that was calculated by applying a sliding window approach to smooth individual fluctuations of standard deviations of nucleotide base pairing probabilities. The blue solid line demonstrates the mean level of all moving average values, and the blue dashed line demonstrates the level equal to the mean of all moving average values decreased by the standard deviation of all moving average values. In this case, the mean and the standard deviation were computed based on all moving average values from all mRNAs of a particular type (pandemic or non-pandemic) of influenza strains. According to our definition, when the moving average goes below the blue dashed line, it is a structured RNA region. Such regions are colored with green across the plots. Plots b and e demonstrate profiles of the mean values of probabilities of nucleotide positions to be in a double-stranded conformation. If this value is close to 1, it means that in most strains in the dataset the correspondent nucleotide has a very high probability to be paired; and, if this value is close to 0, the correspondent nucleotide is very likely to be unpaired in most strains in the dataset. Plots c and f demonstrate mutability profiles for influenza mRNAs. Mutability of every nucleotide position is computed as a value of Shannon entropy which is calculated based on frequency of every ribonucleotide in a particular position.

Supplementary Figure 2

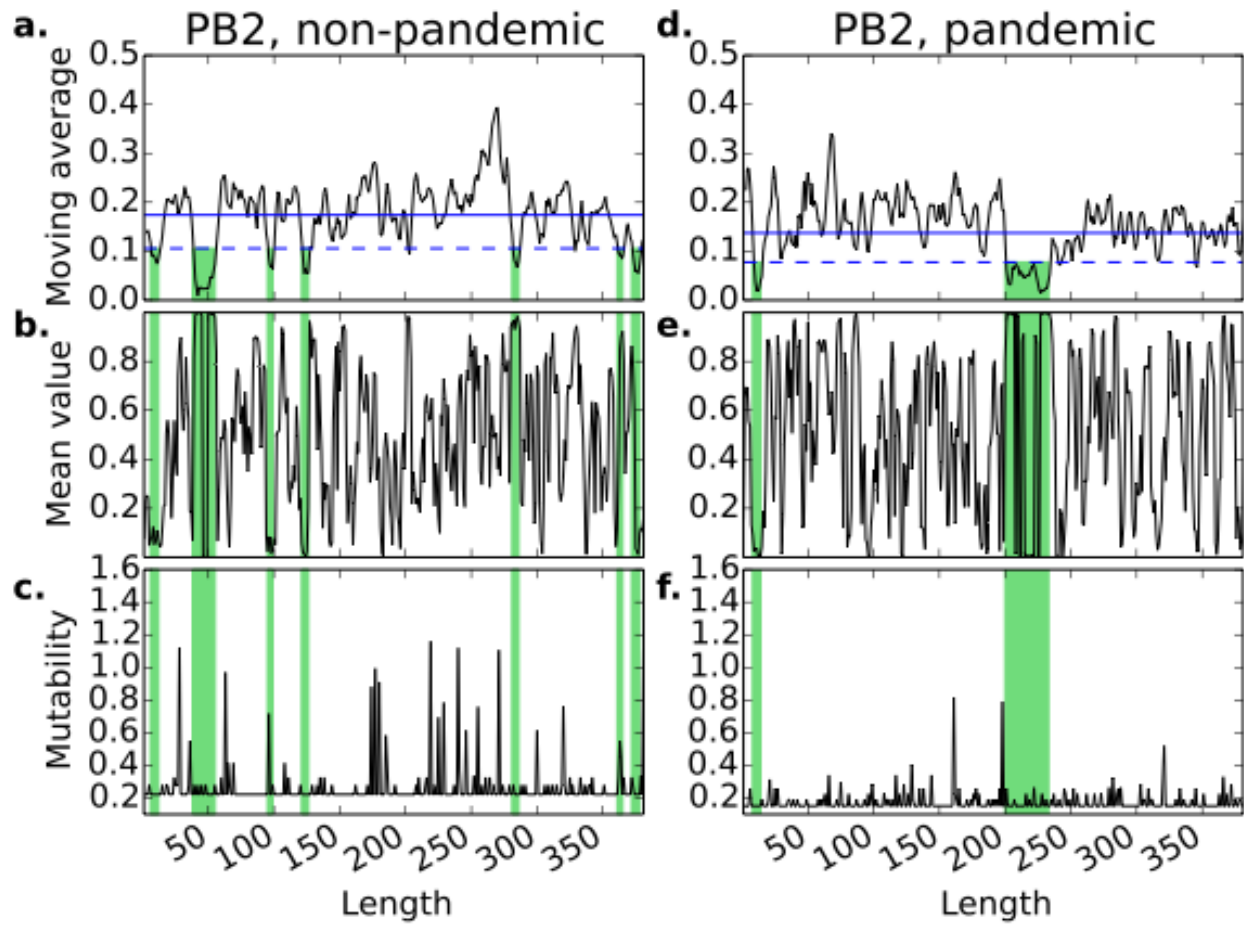

Supplementary Figure 3

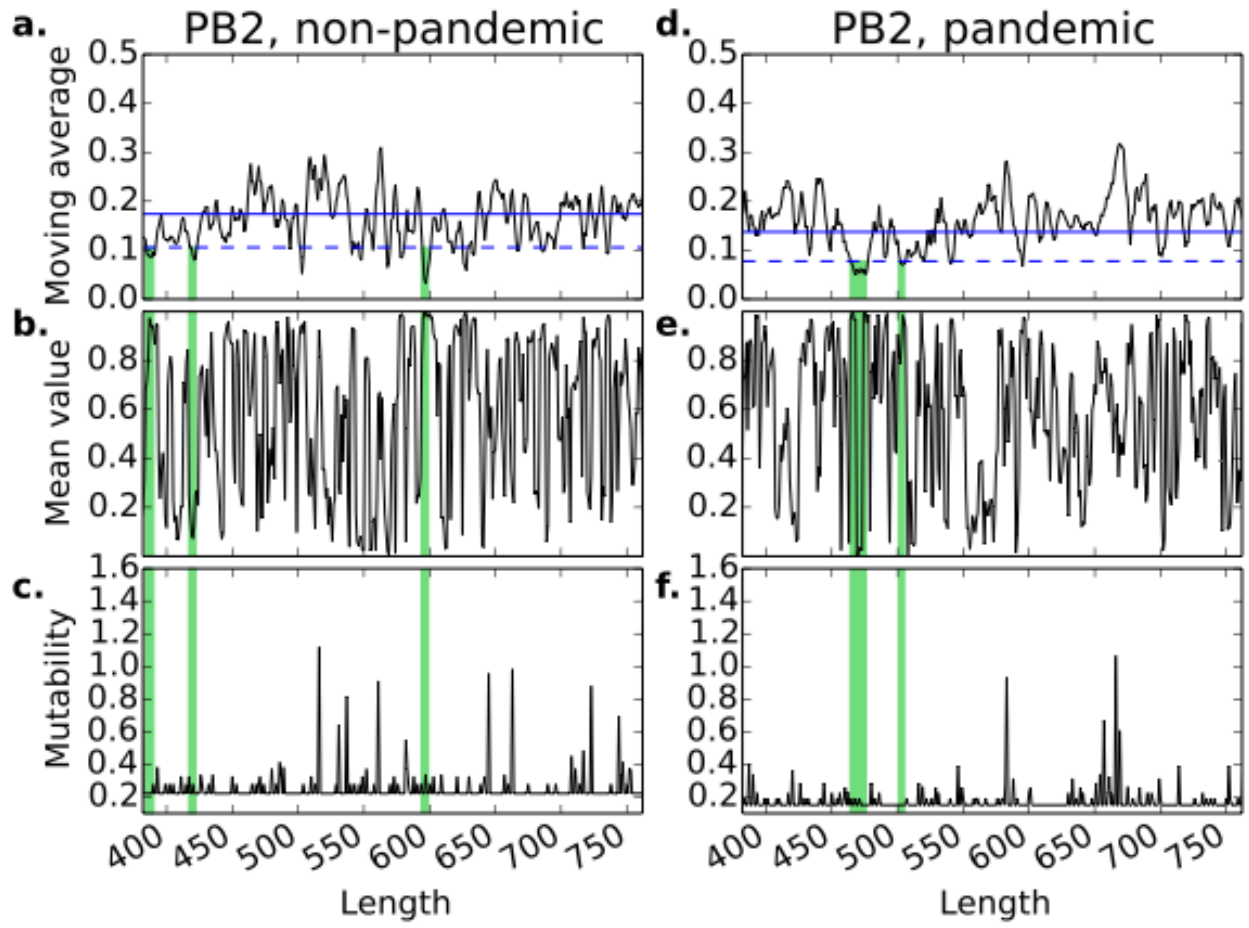

Supplementary Figure 4

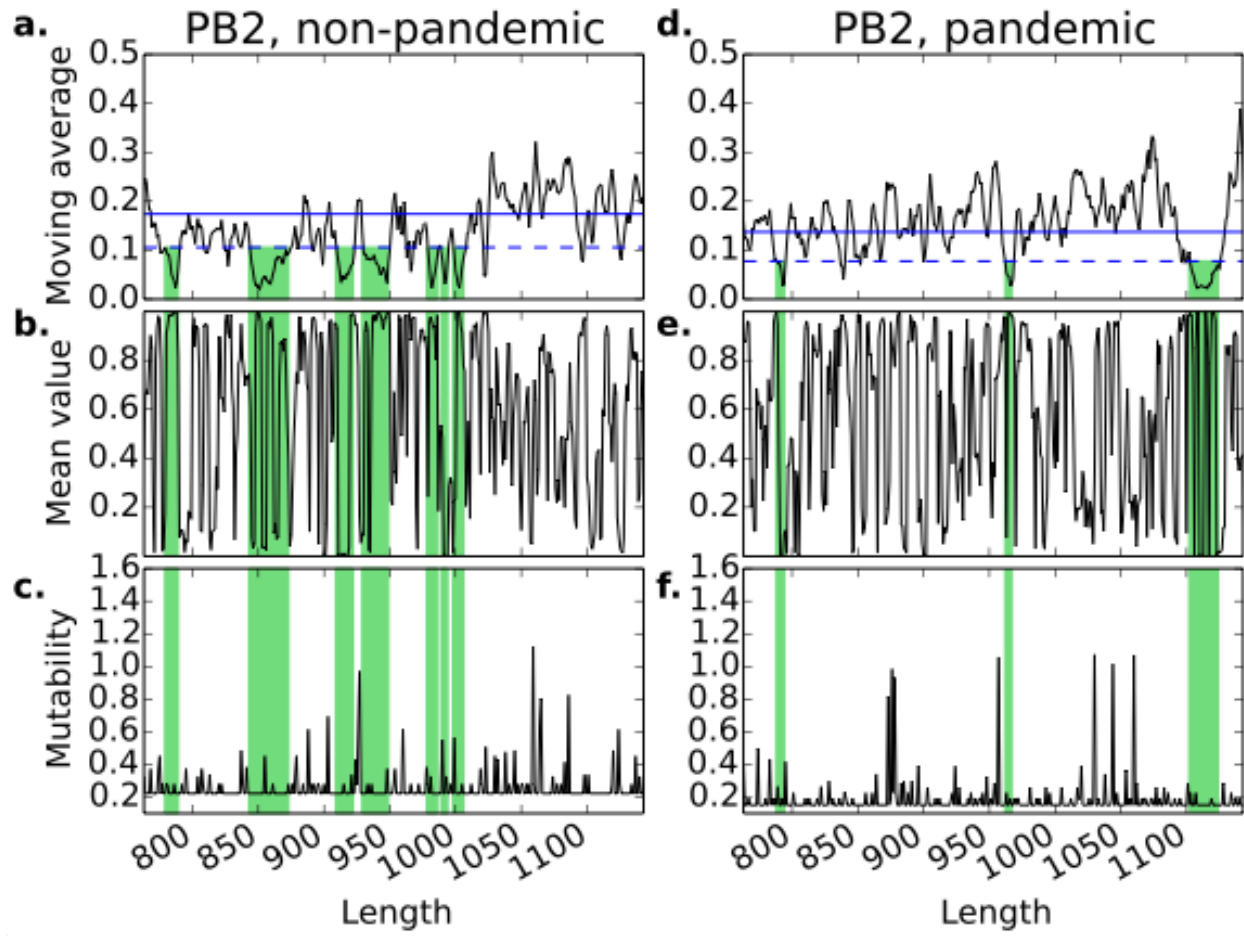

Supplementary Figure 5

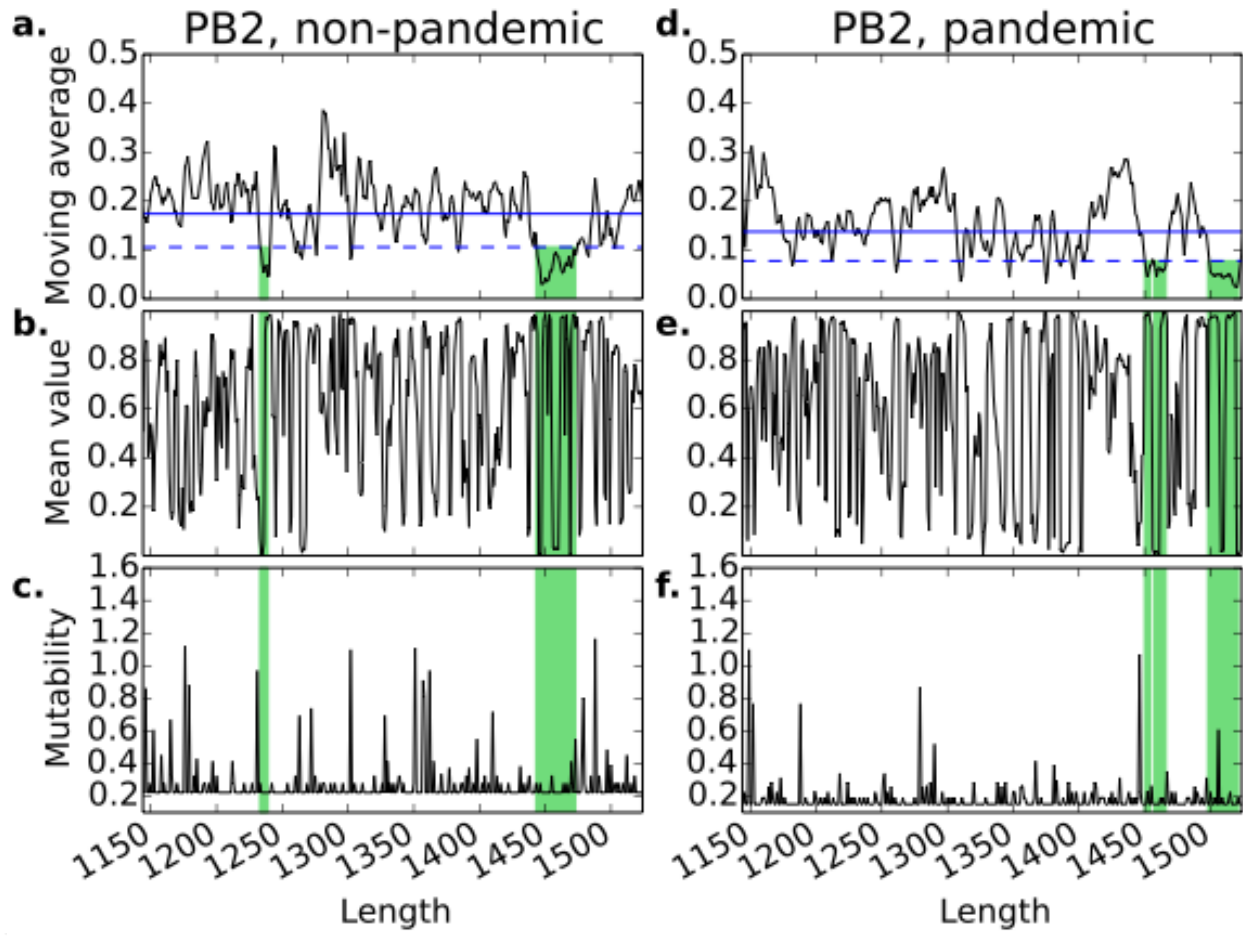

Supplementary Figure 6

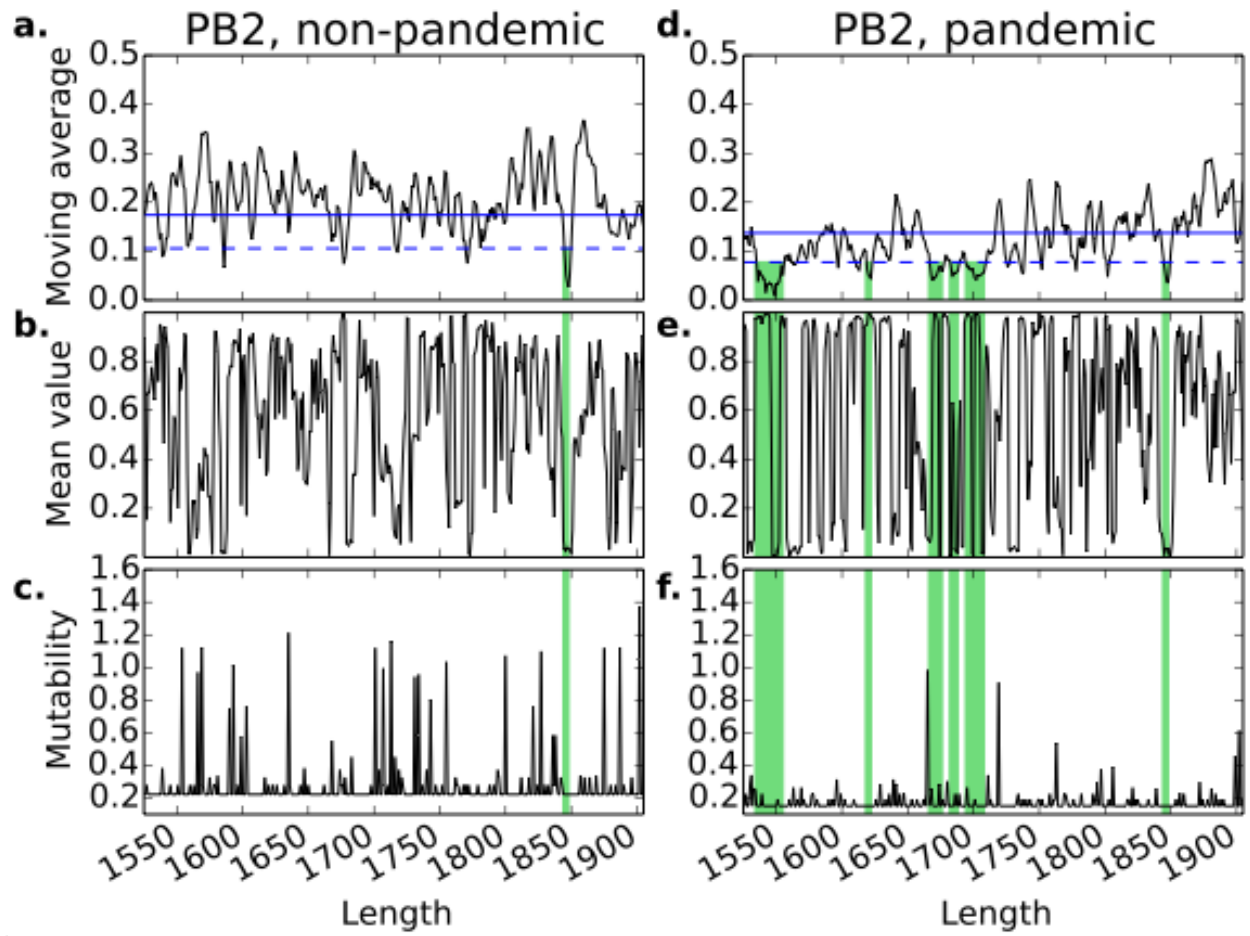

Supplementary Figure 7

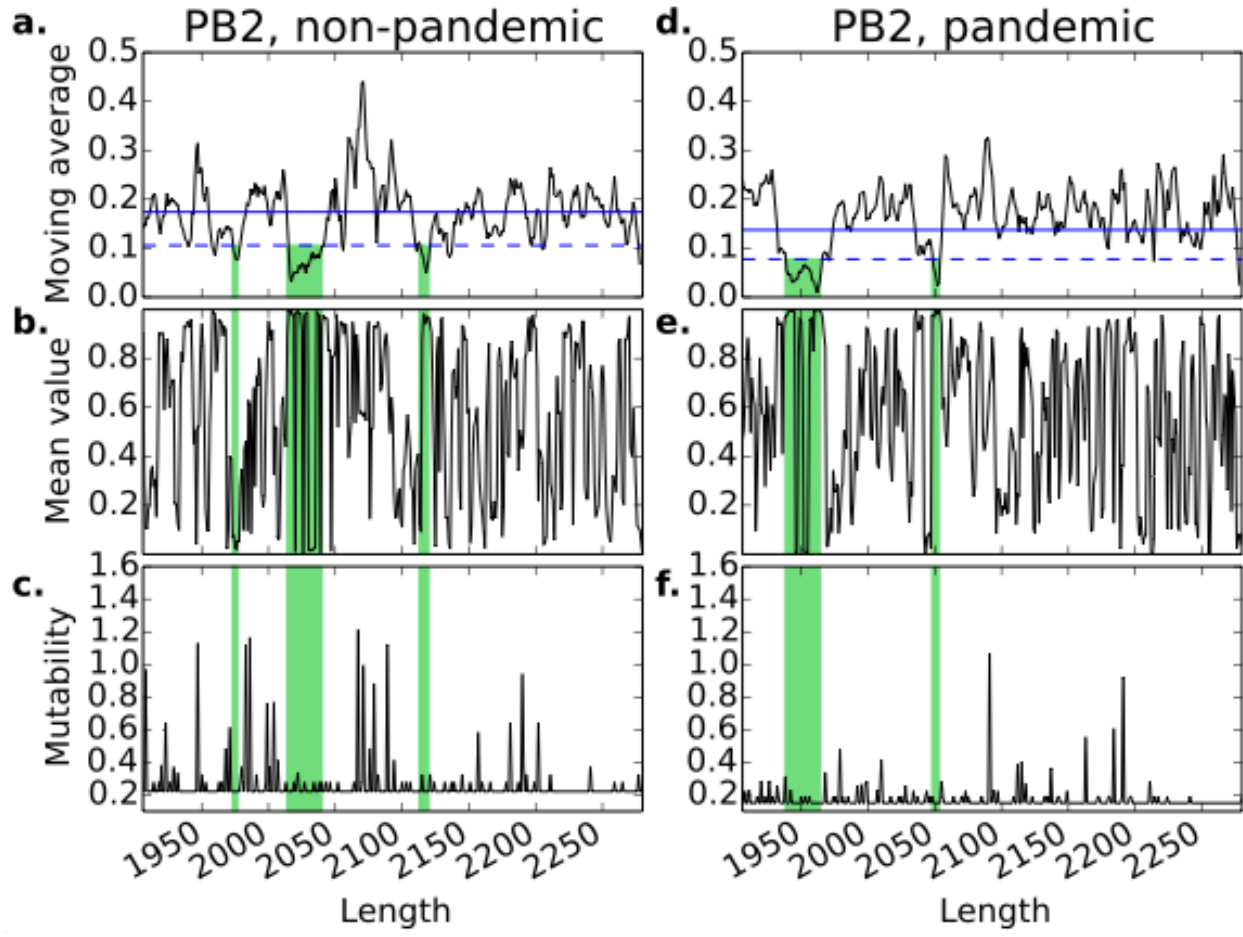

Supplementary Figure 8

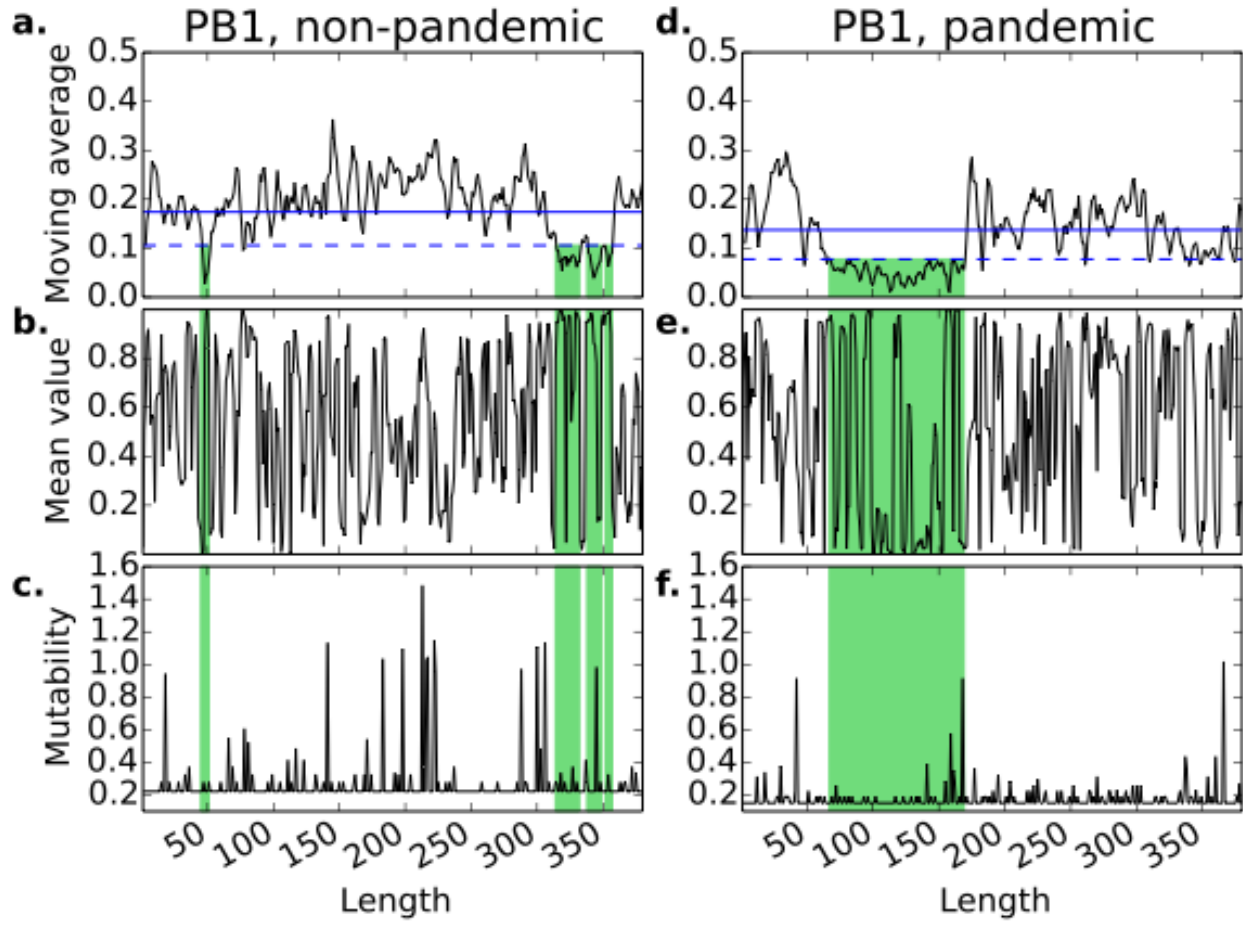



Supplementary Figure 9

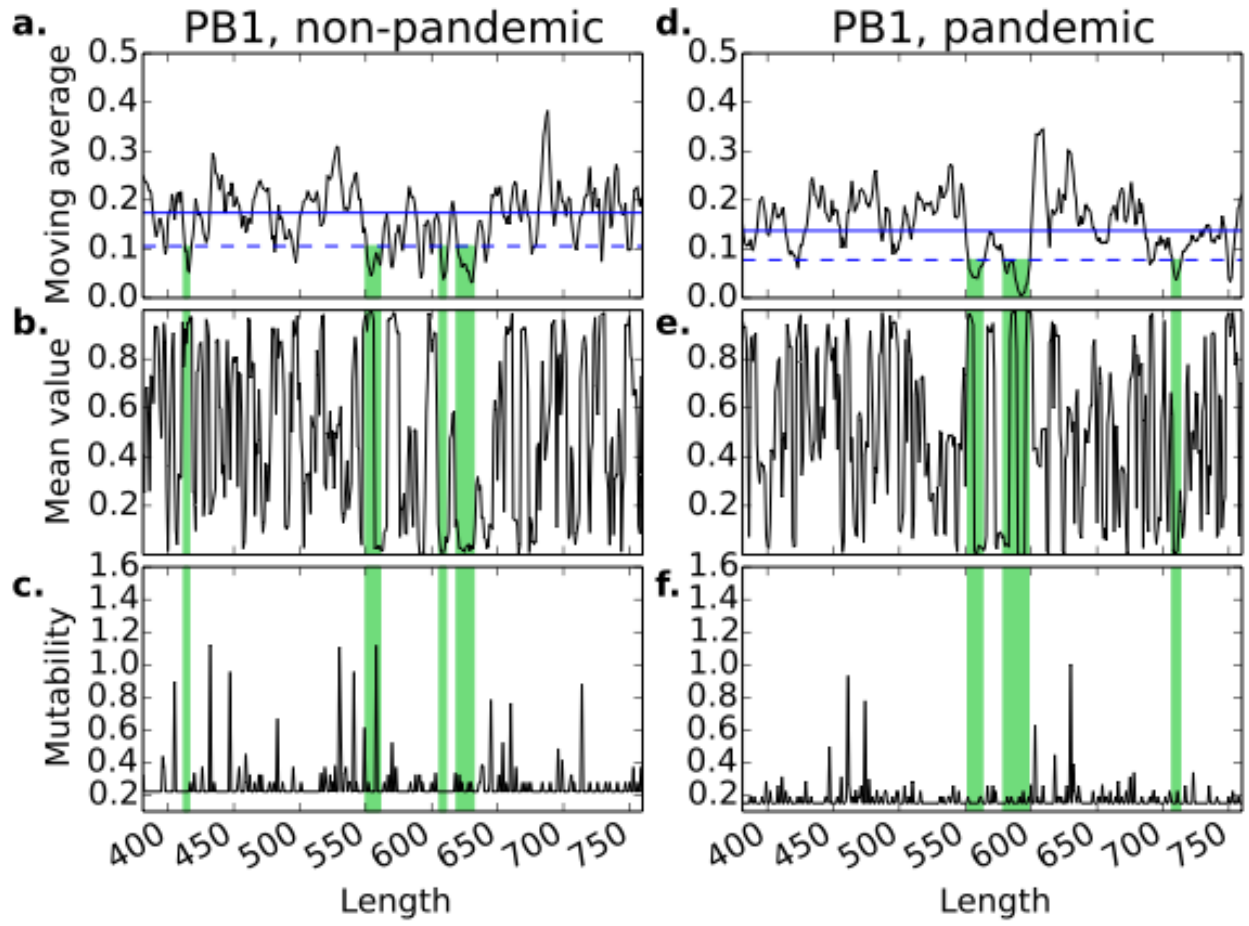

Supplementary Figure 10

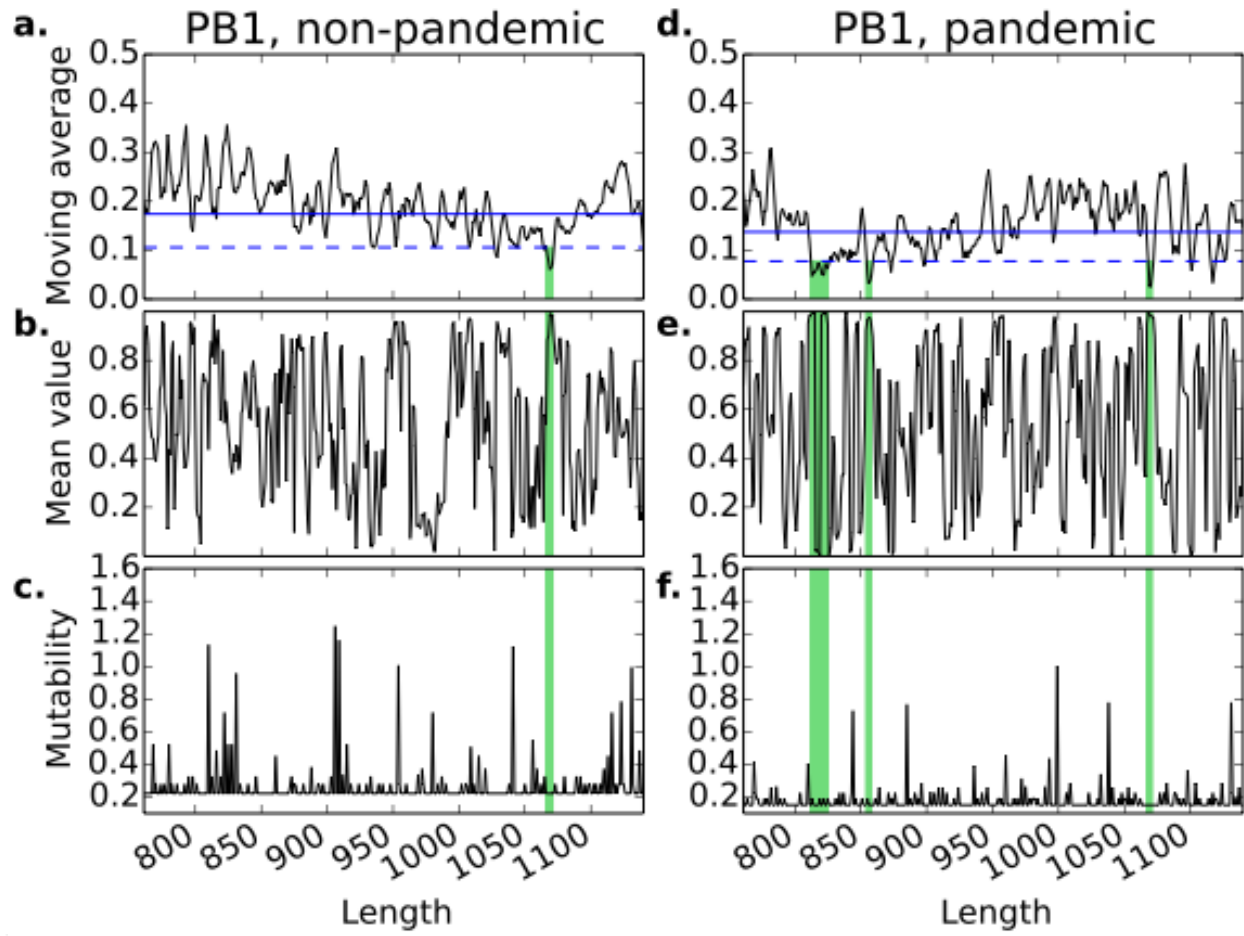

Supplementary Figure 11

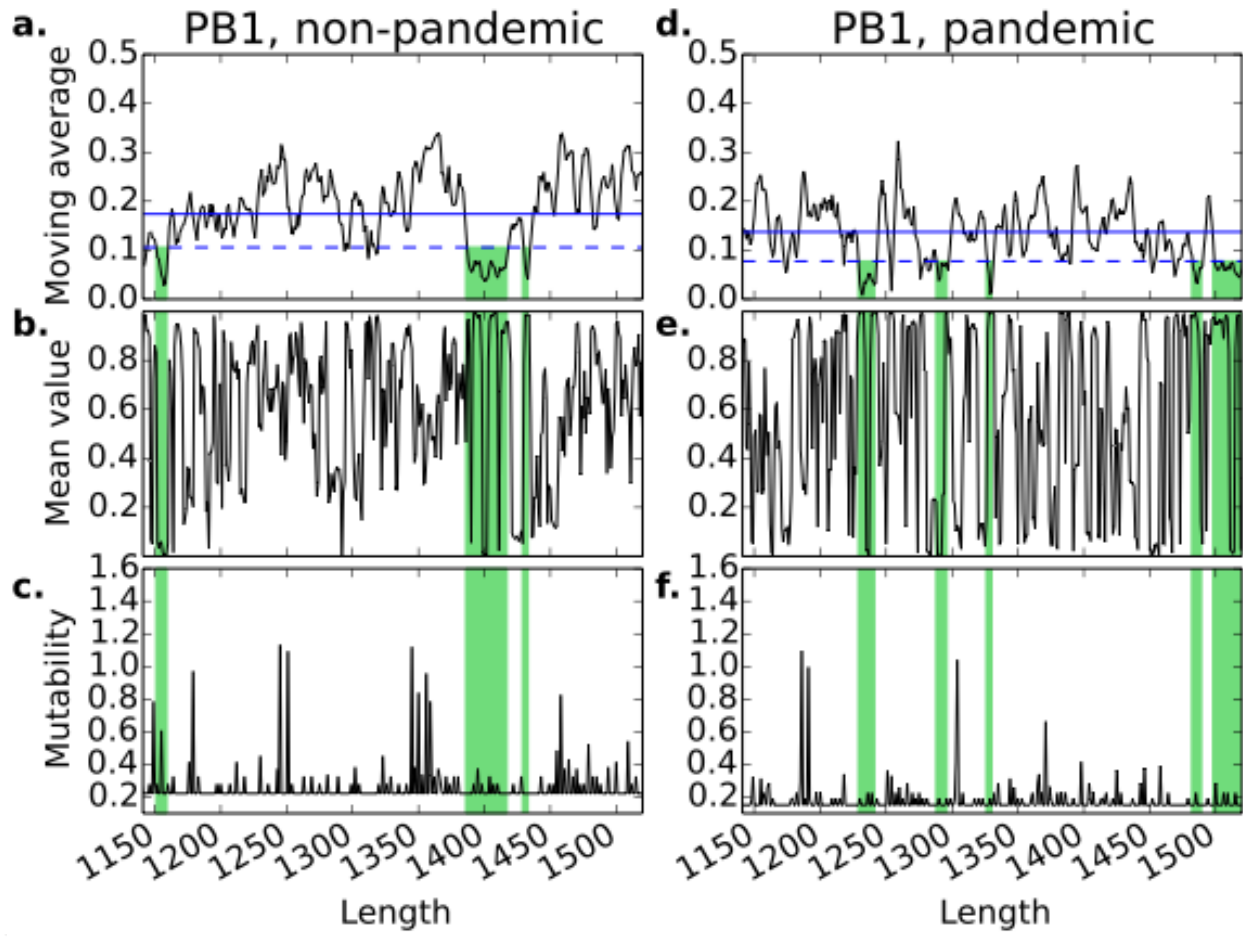

Supplementary Figure 12

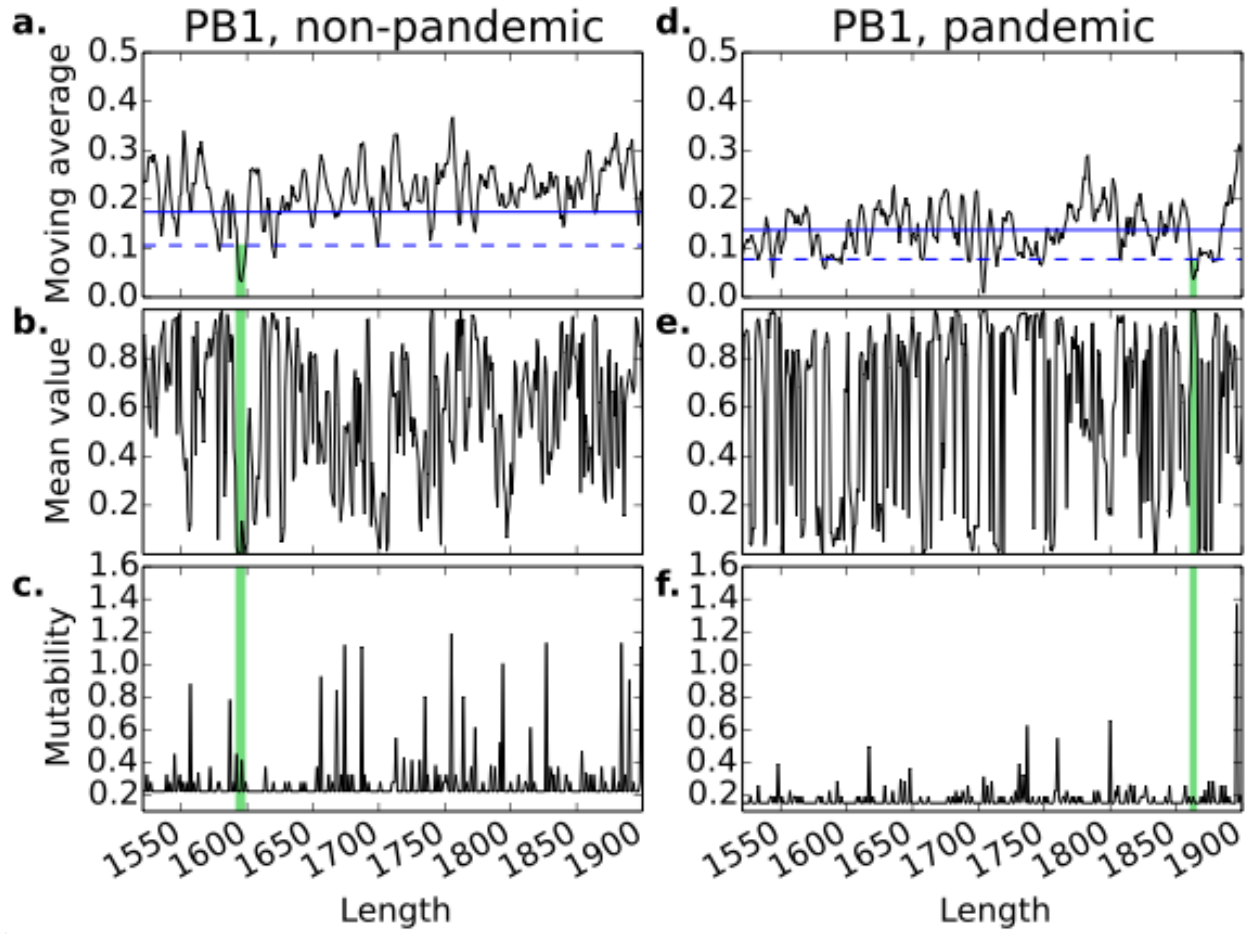

Supplementary Figure 13

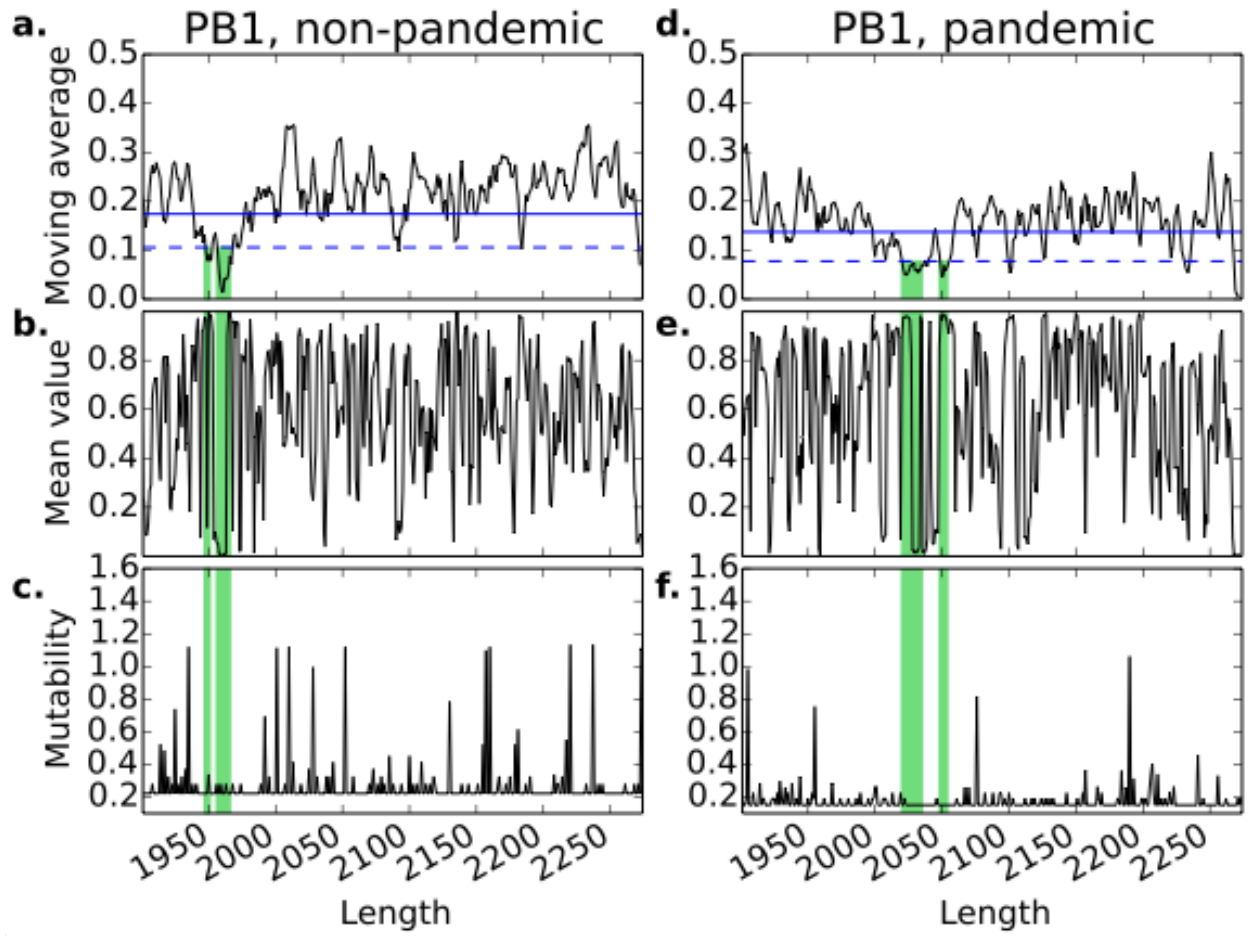

Supplementary Figure 14

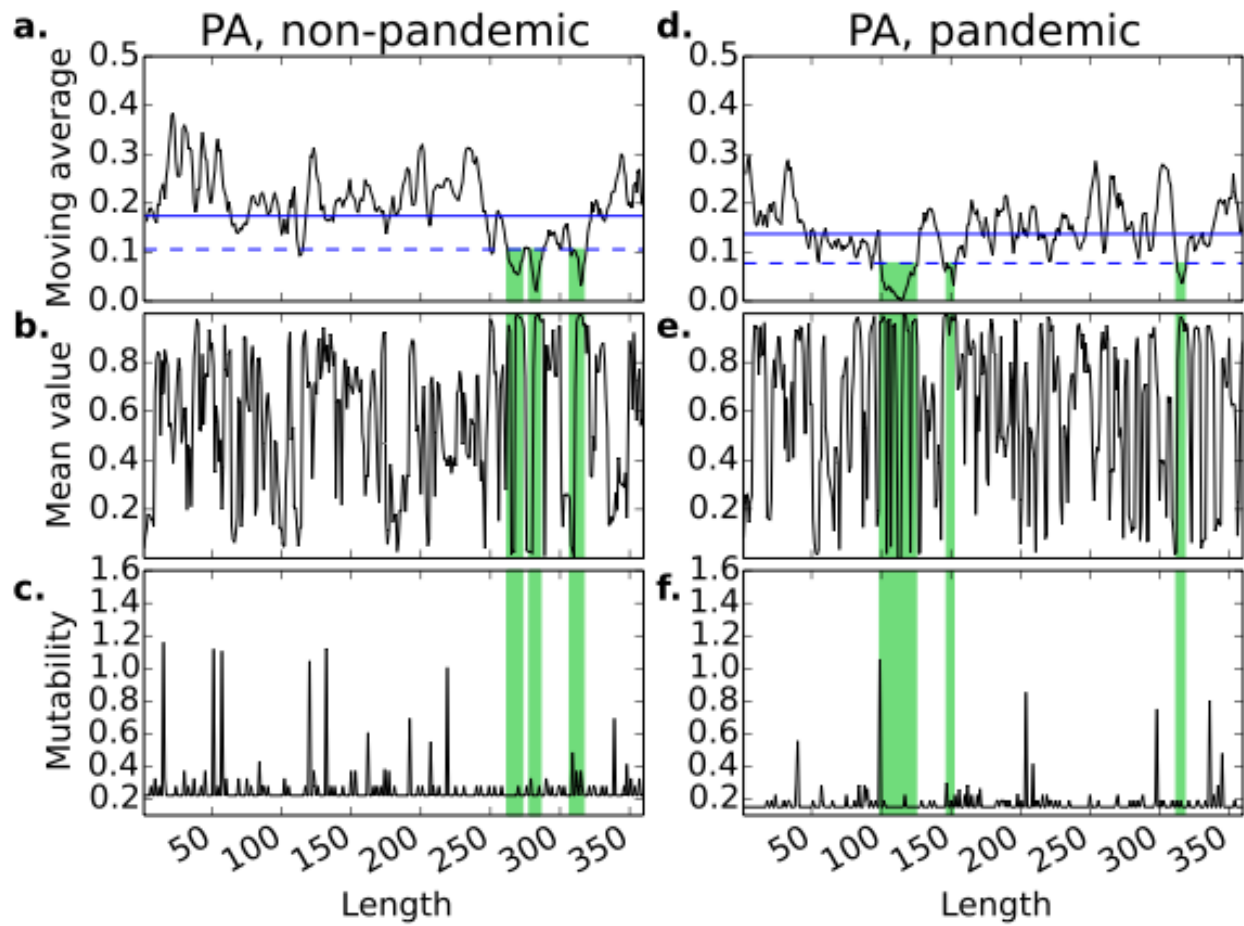

Supplementary Figure 15

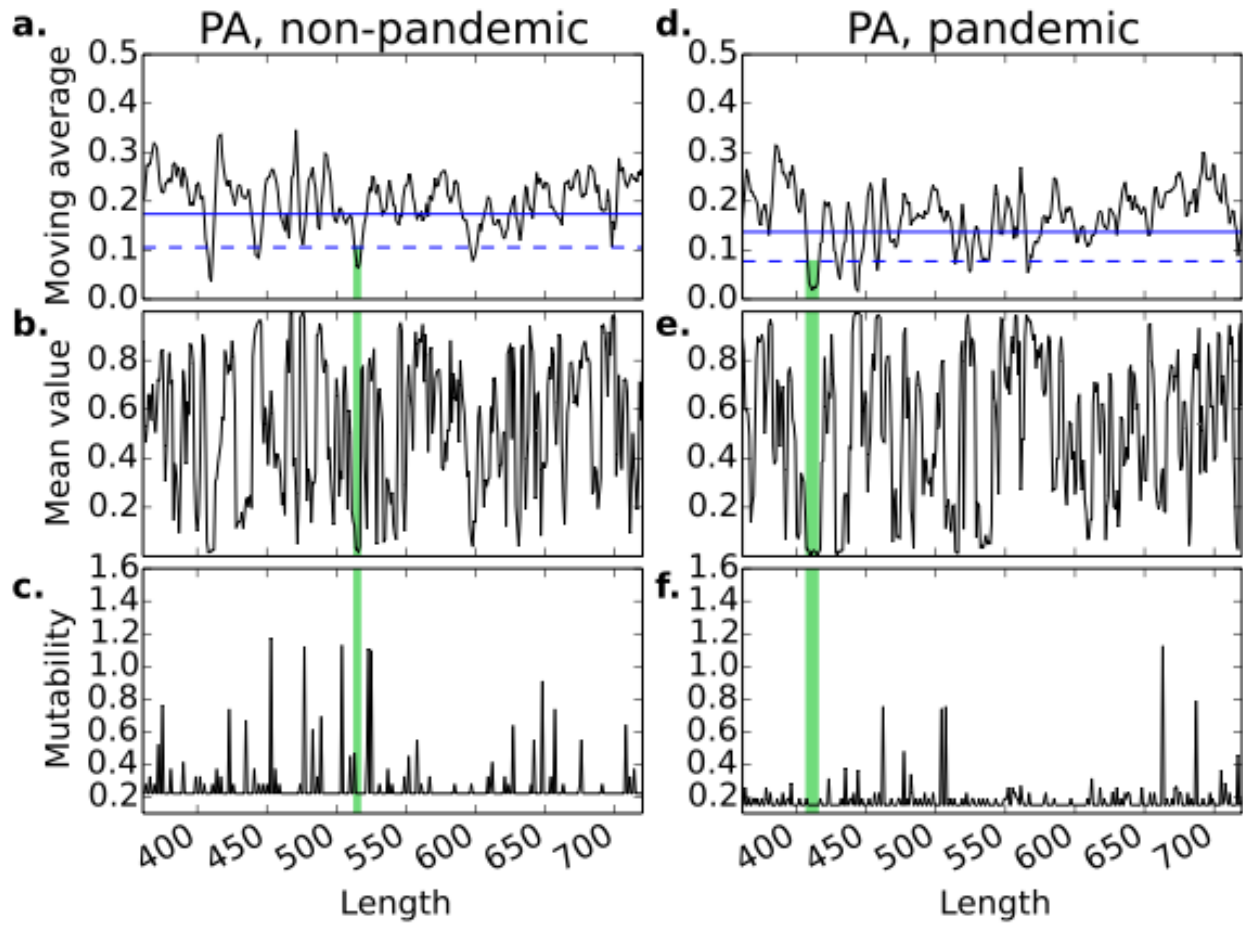

Supplementary Figure 16

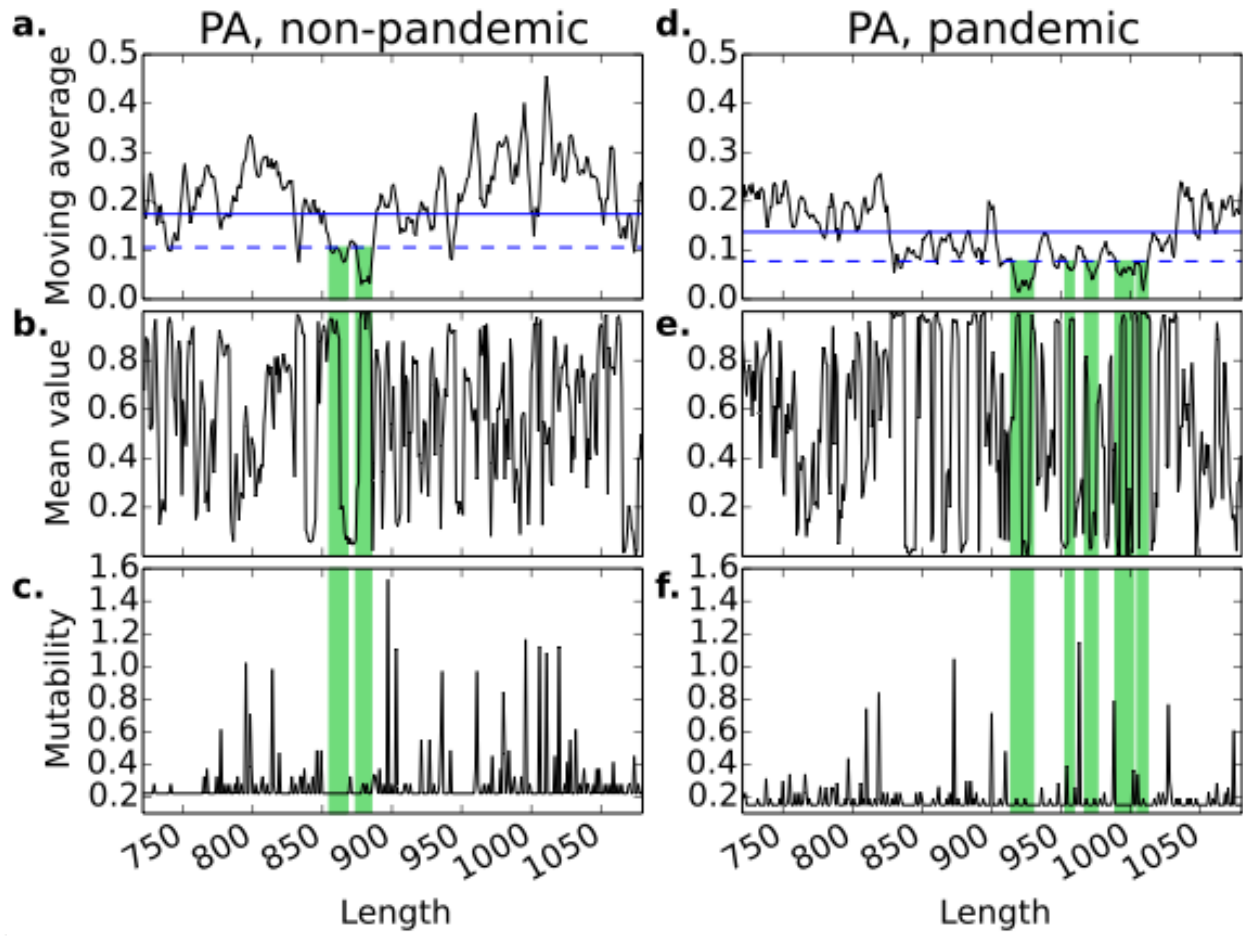



Supplementary Figure 17

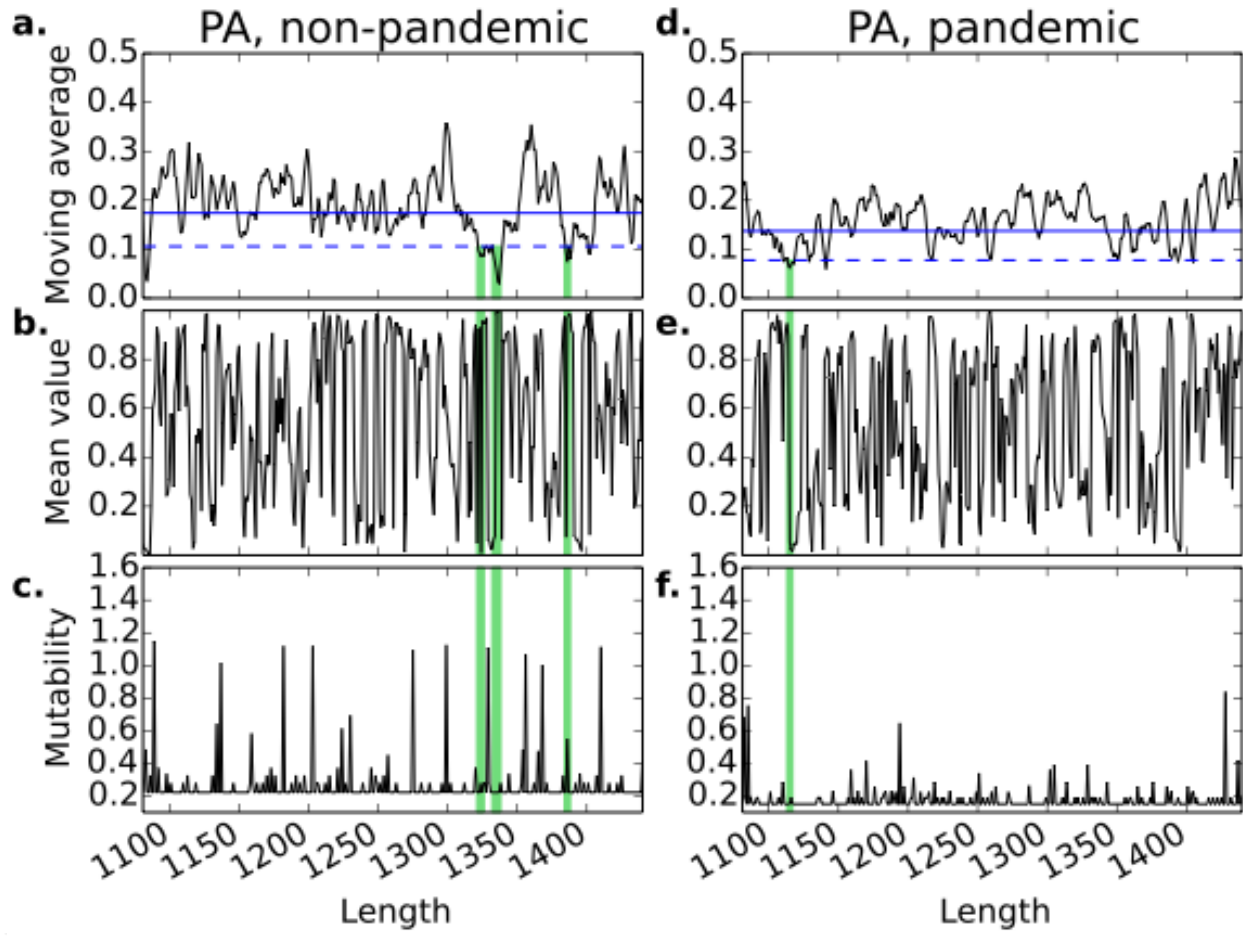

Supplementary Figure 18

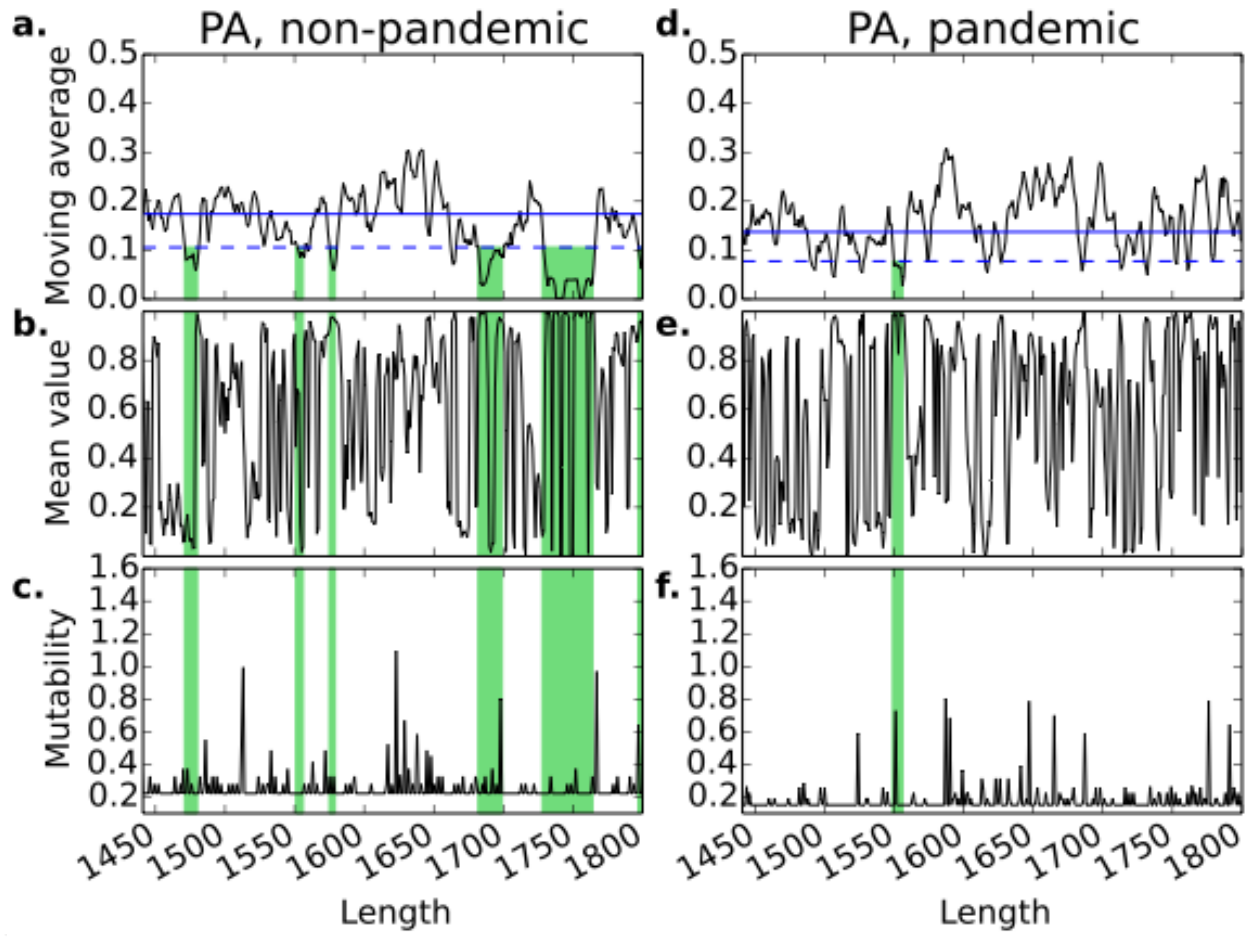

Supplementary Figure 19

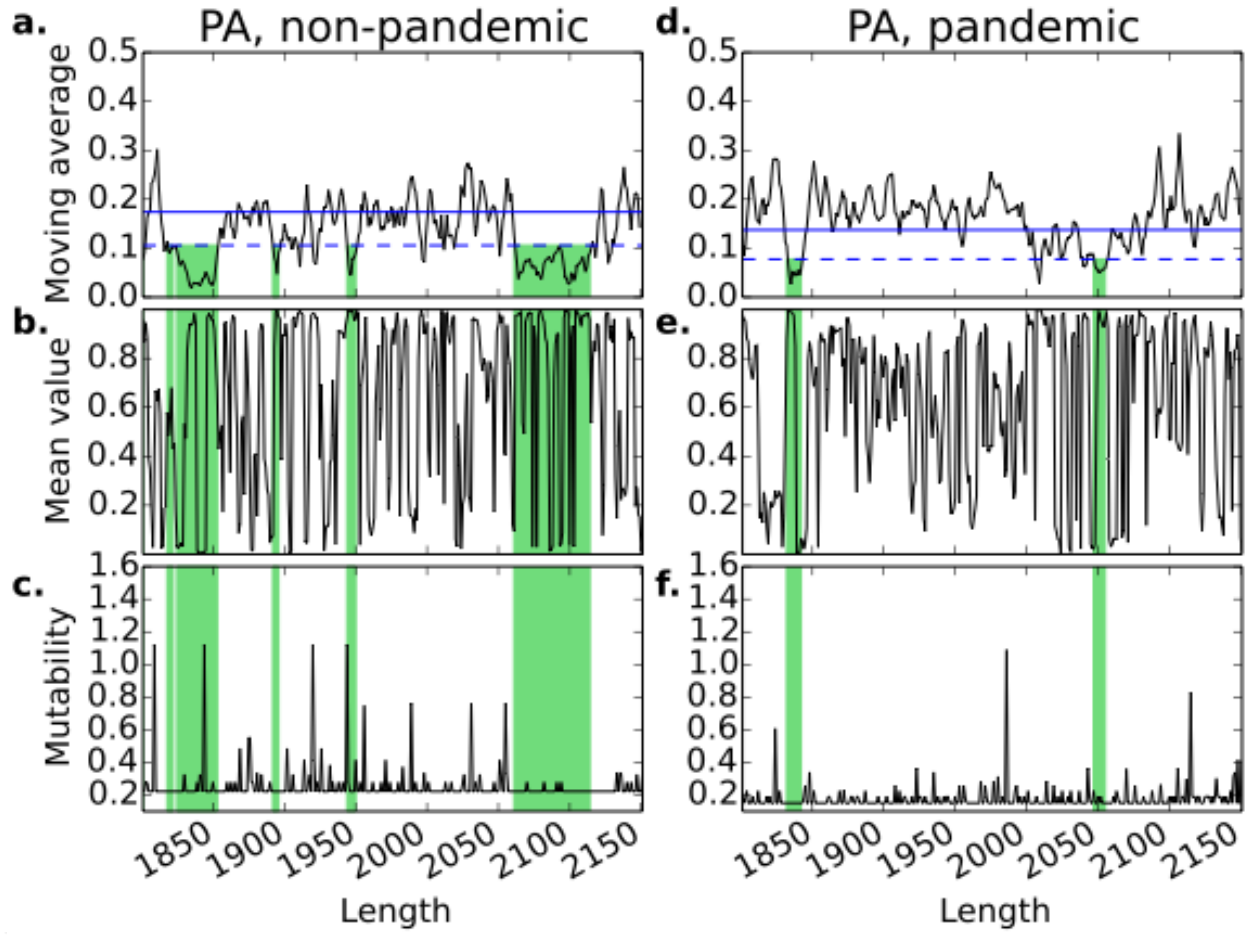

Supplementary Figure 20

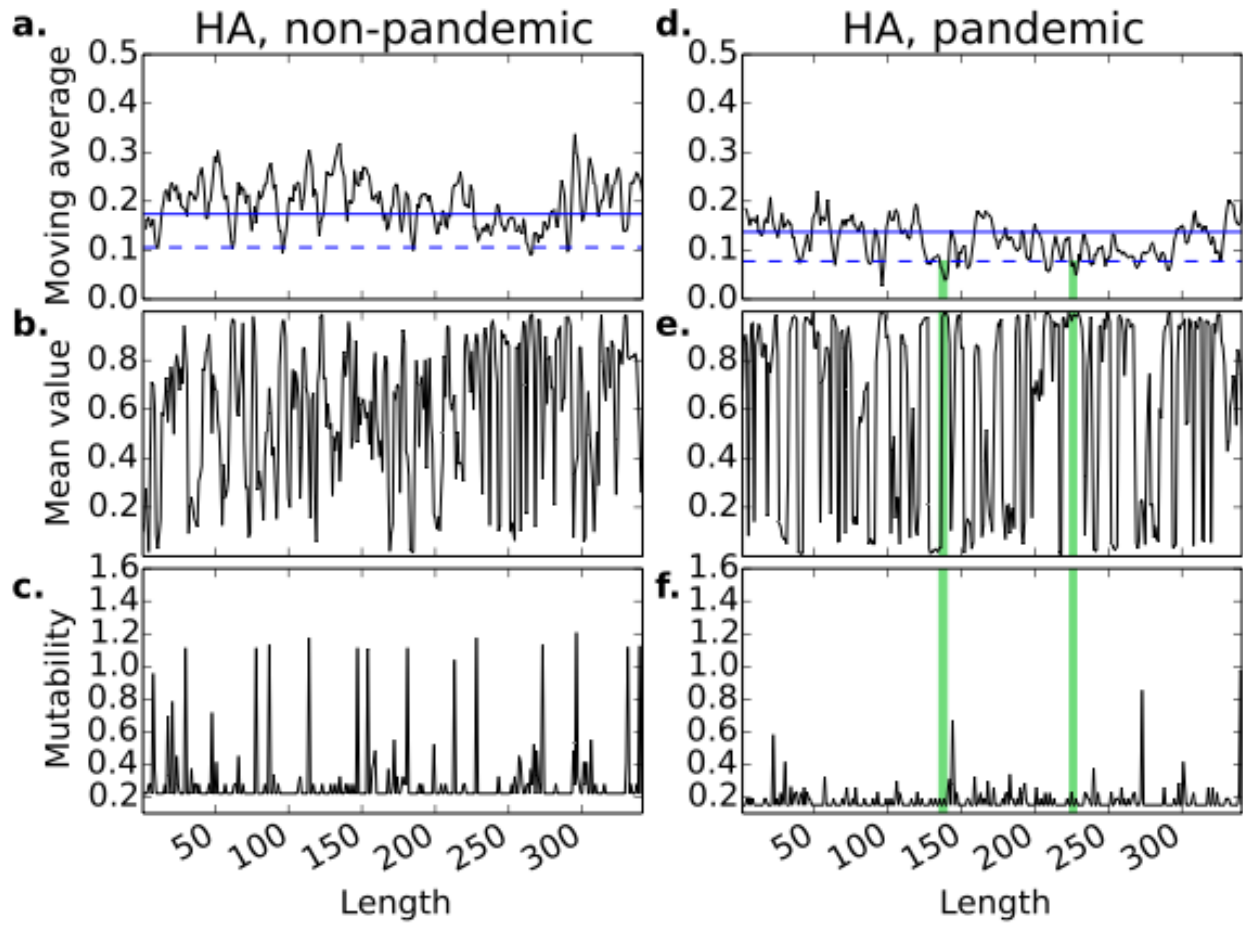

Supplementary Figure 21

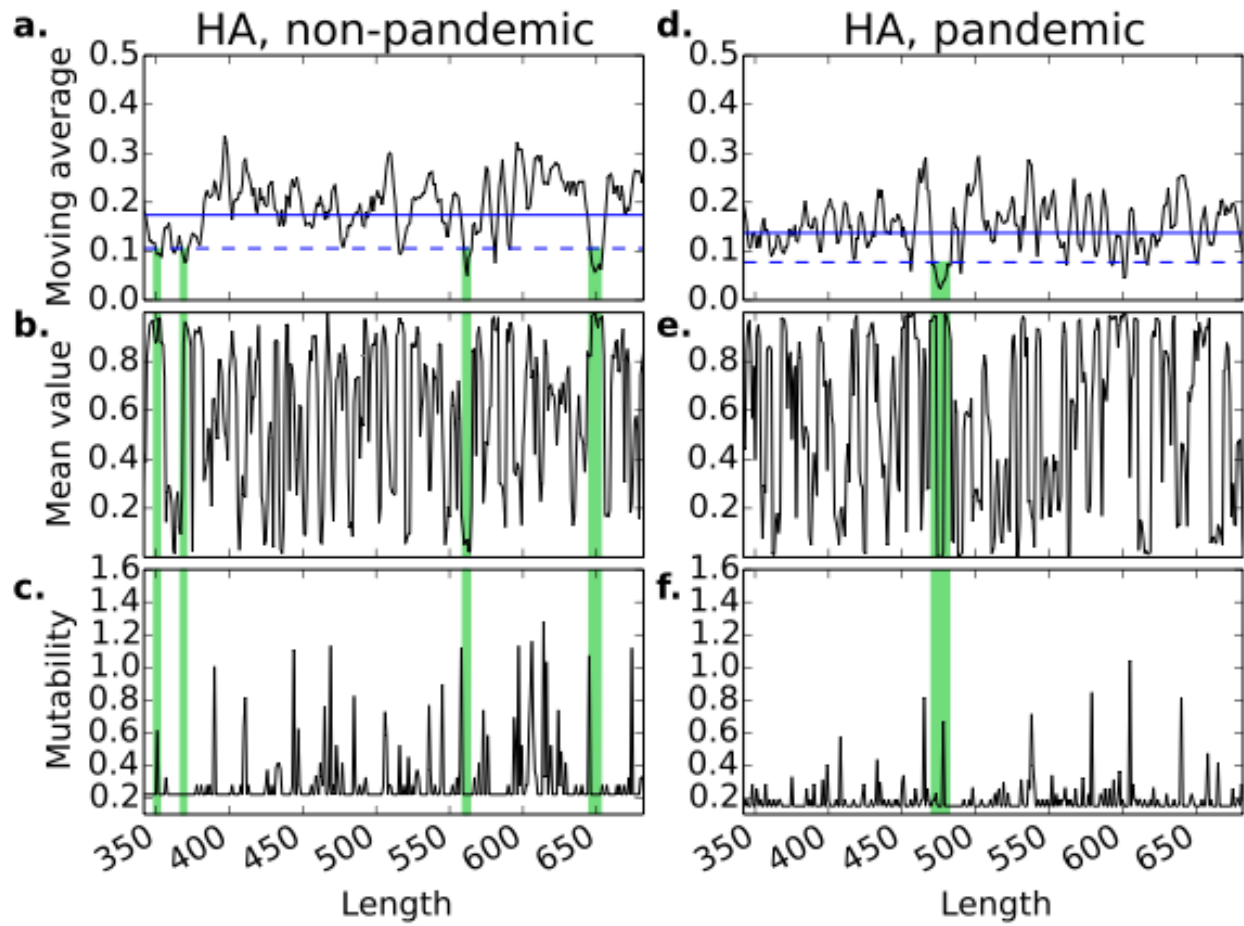

Supplementary Figure 22

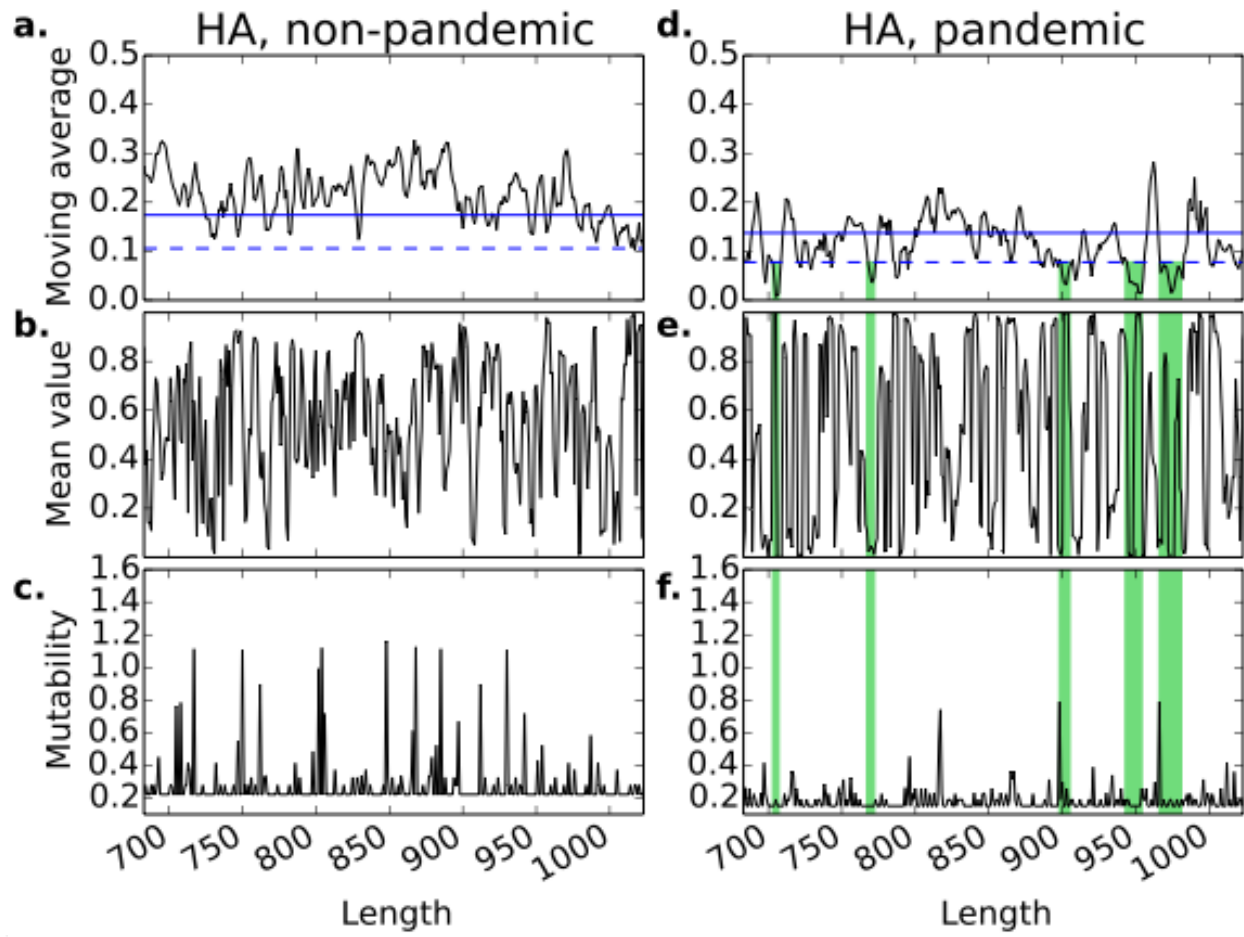

Supplementary Figure 23

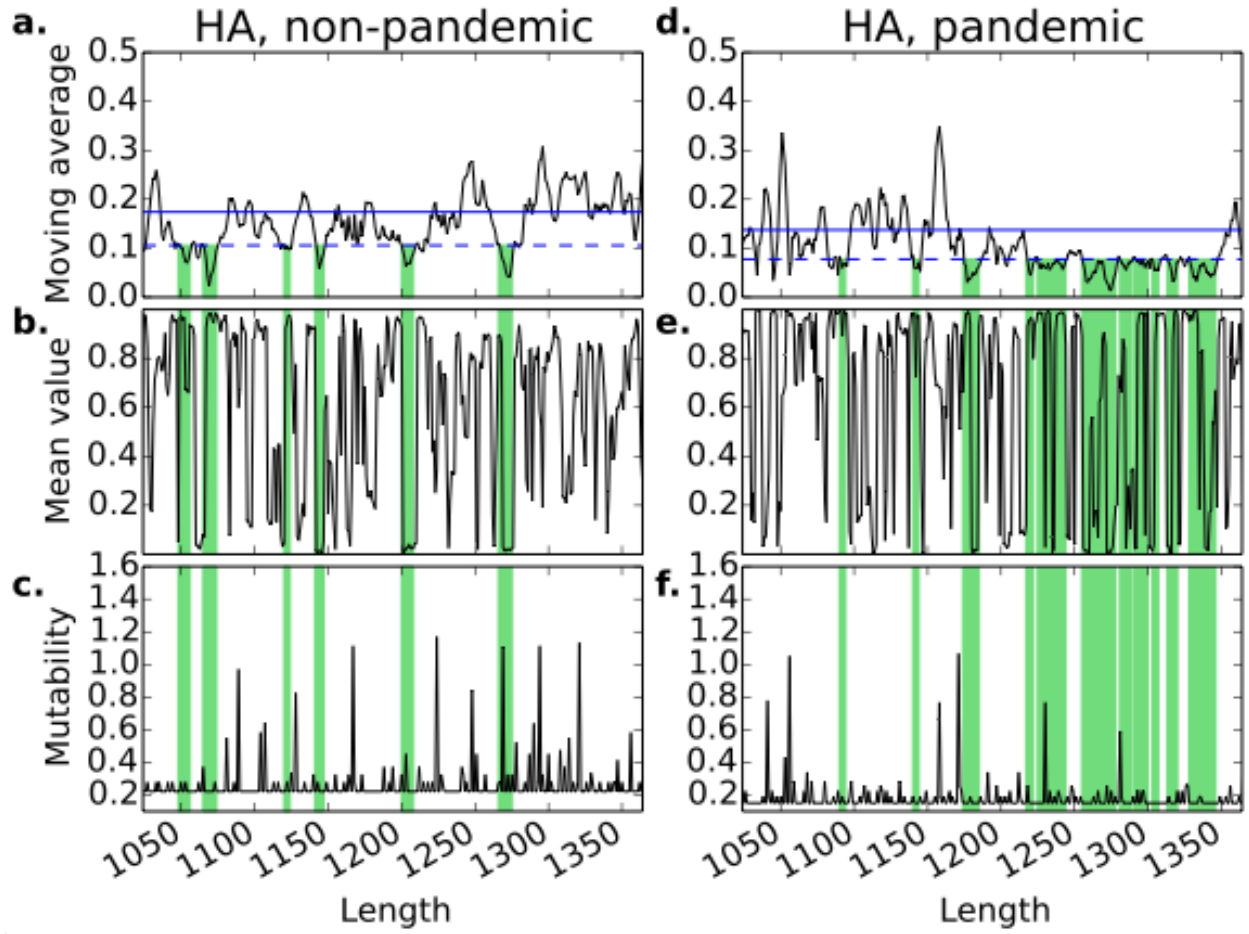

Supplementary Figure 24

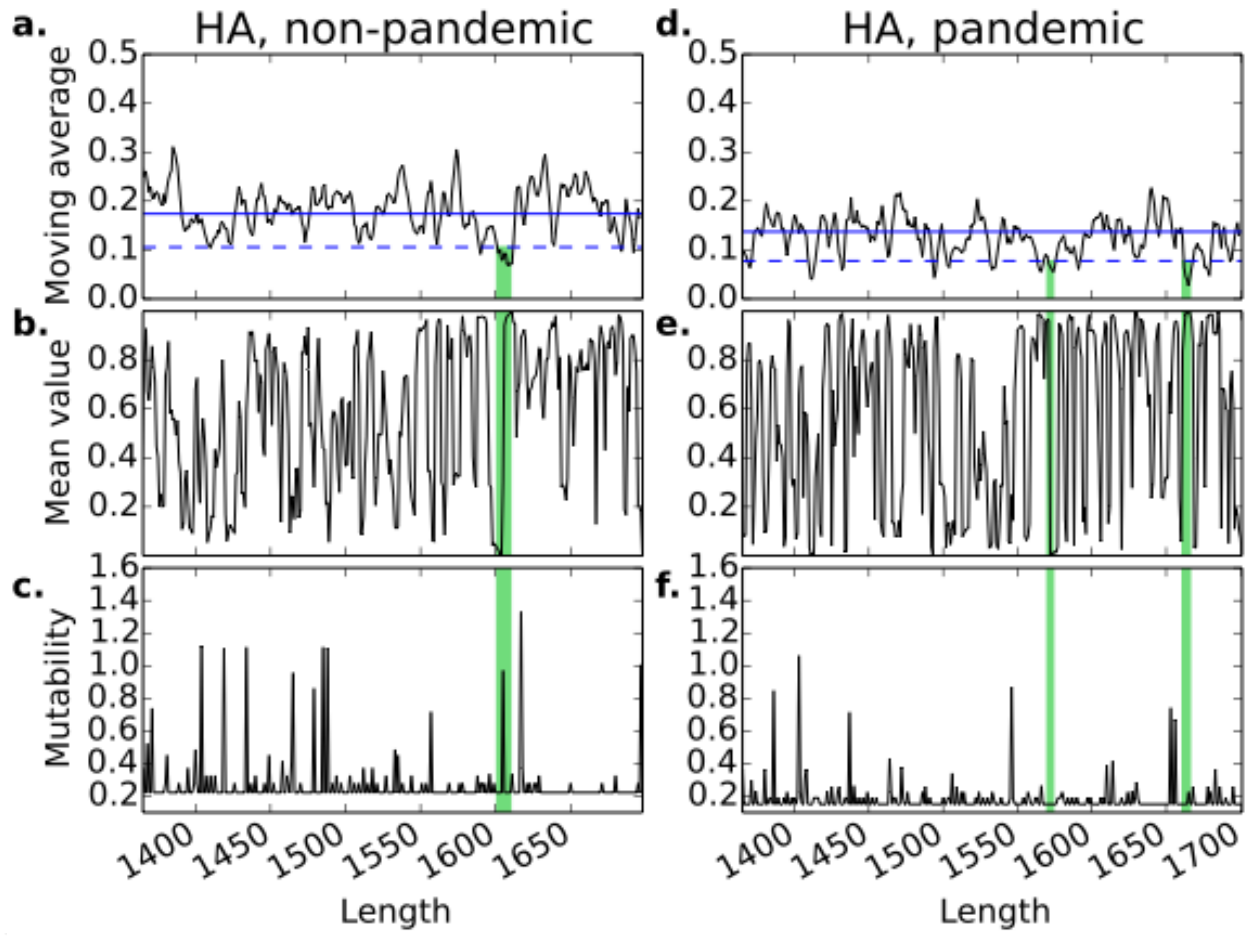



Supplementary Figure 25

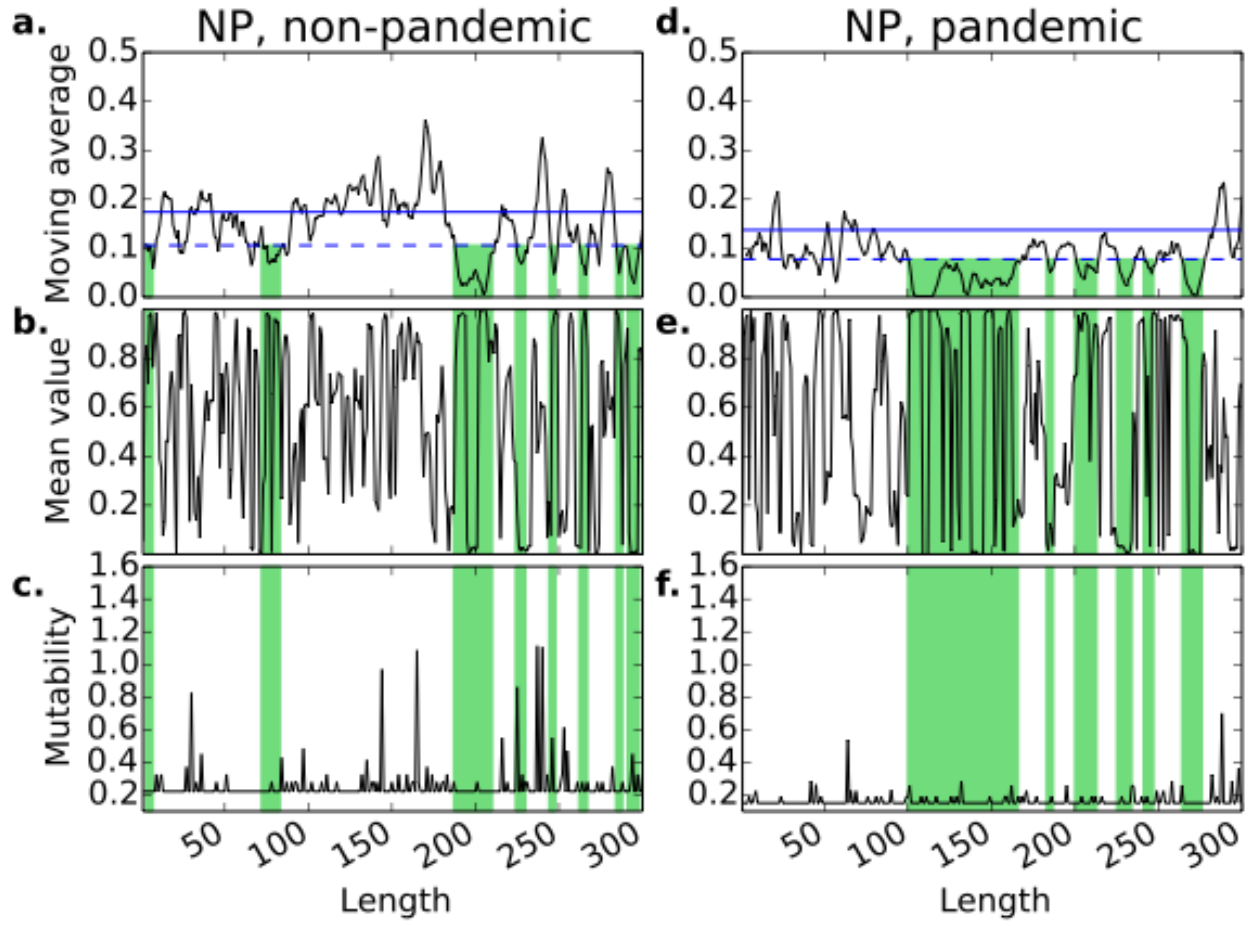

Supplementary Figure 26

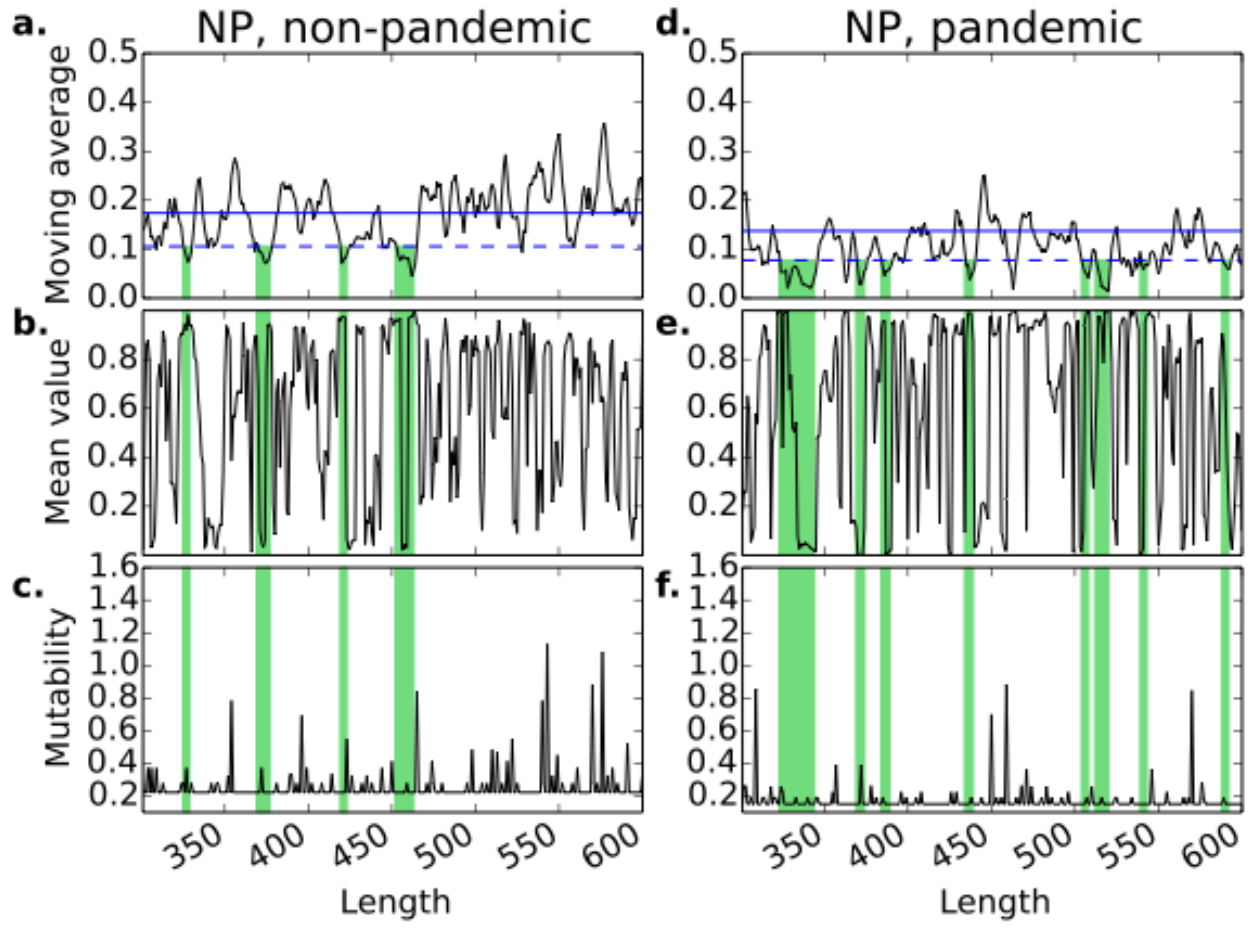

Supplementary Figure 27

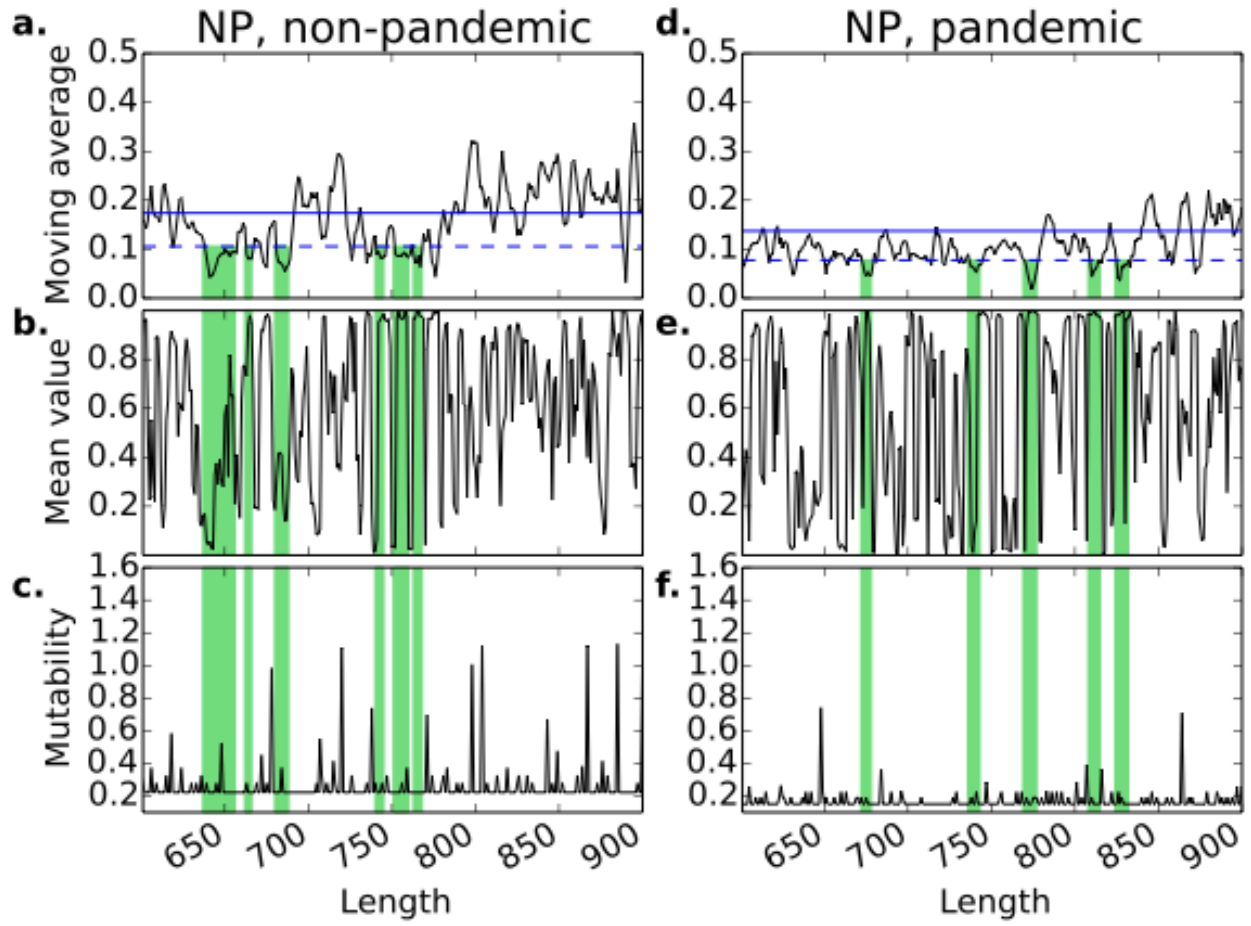

Supplementary Figure 28

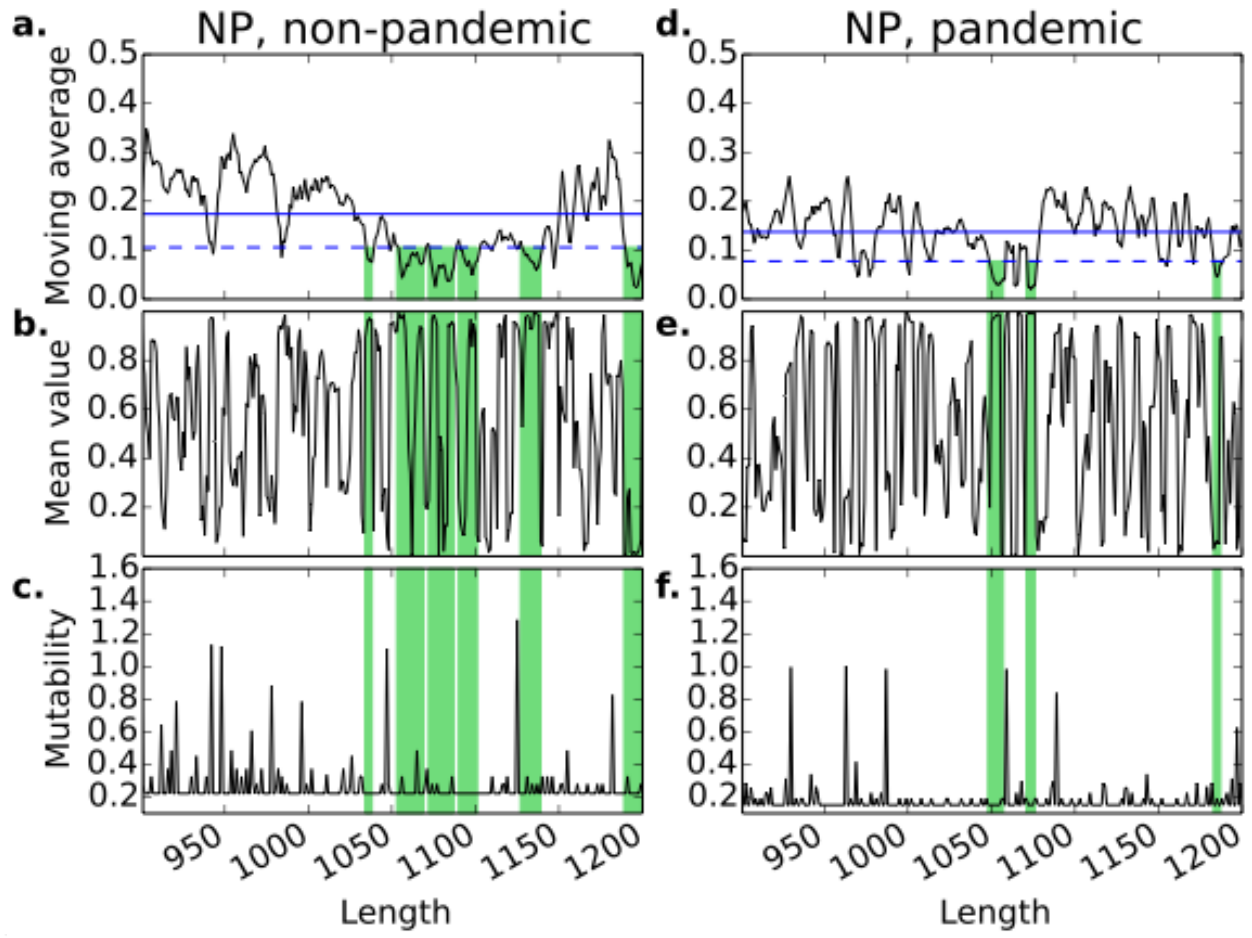

Supplementary Figure 29

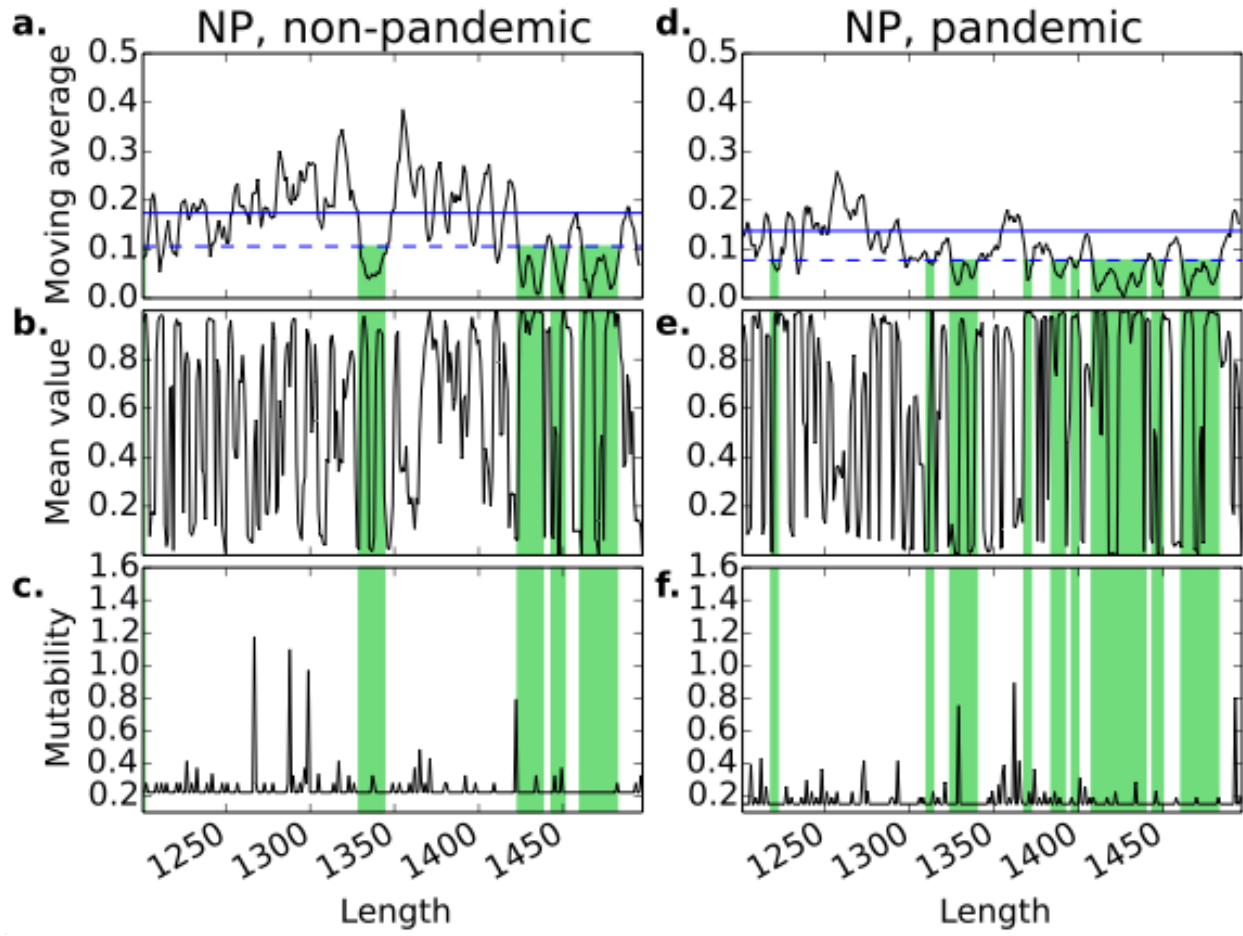

Supplementary Figure 30

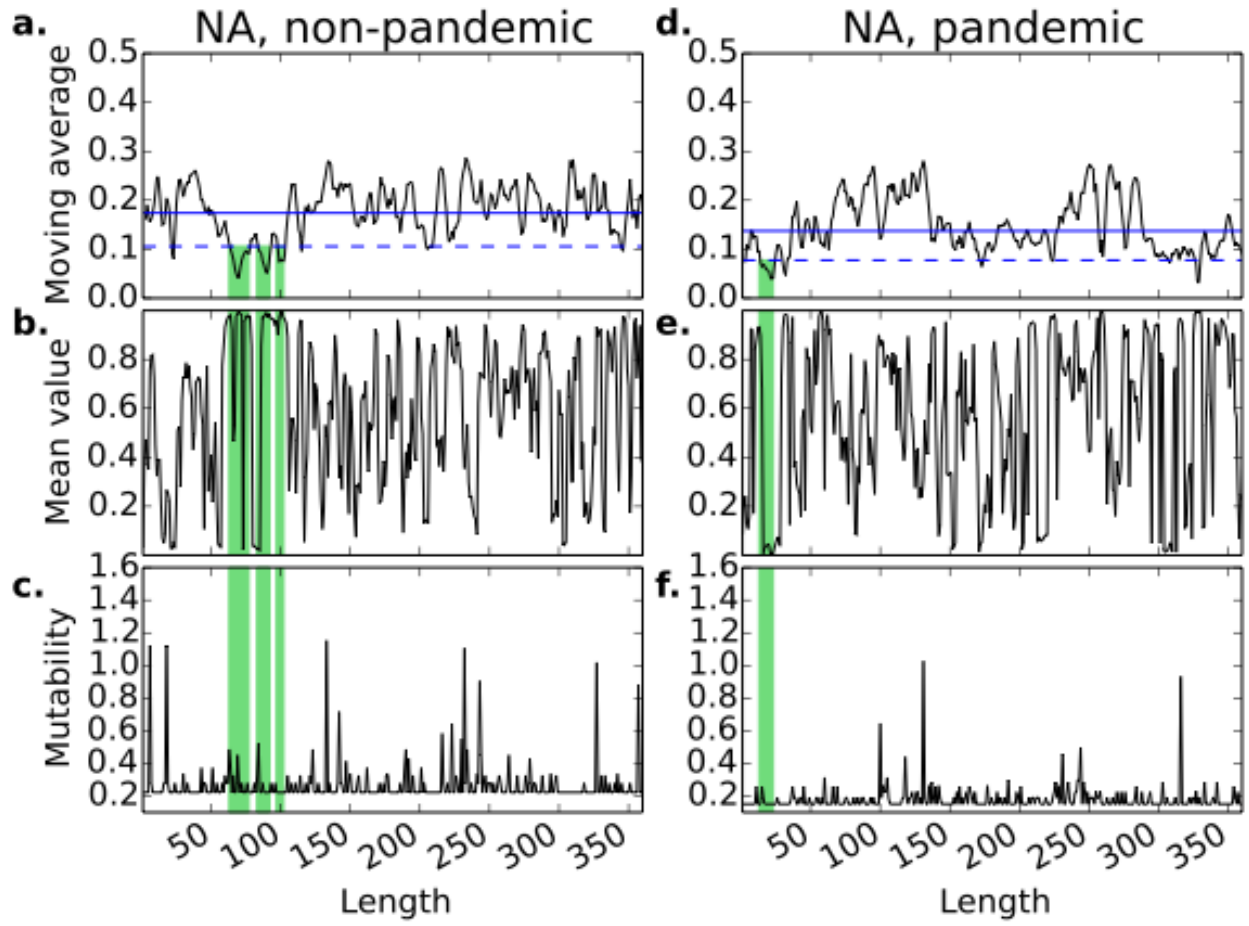

Supplementary Figure 31

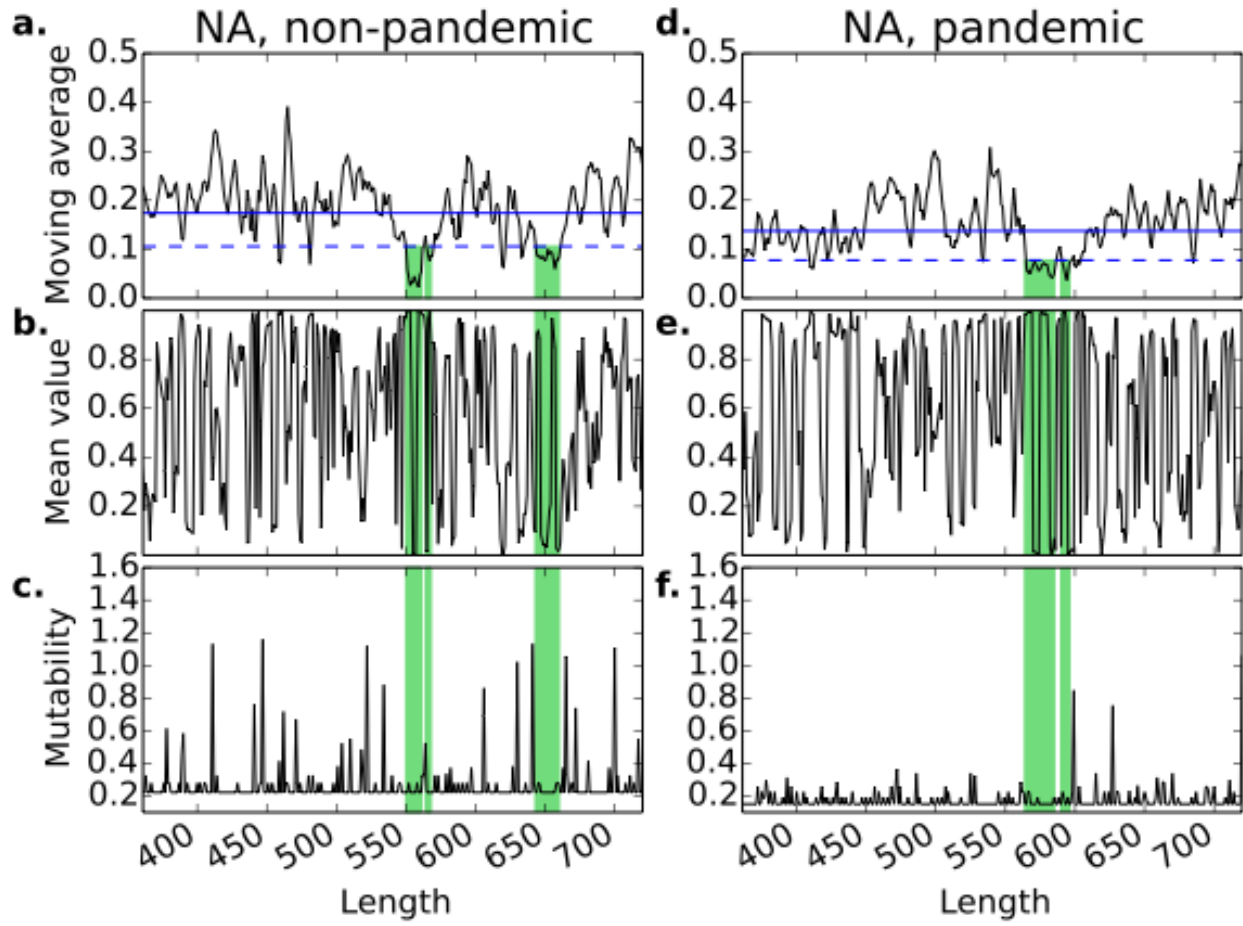

Supplementary Figure 32

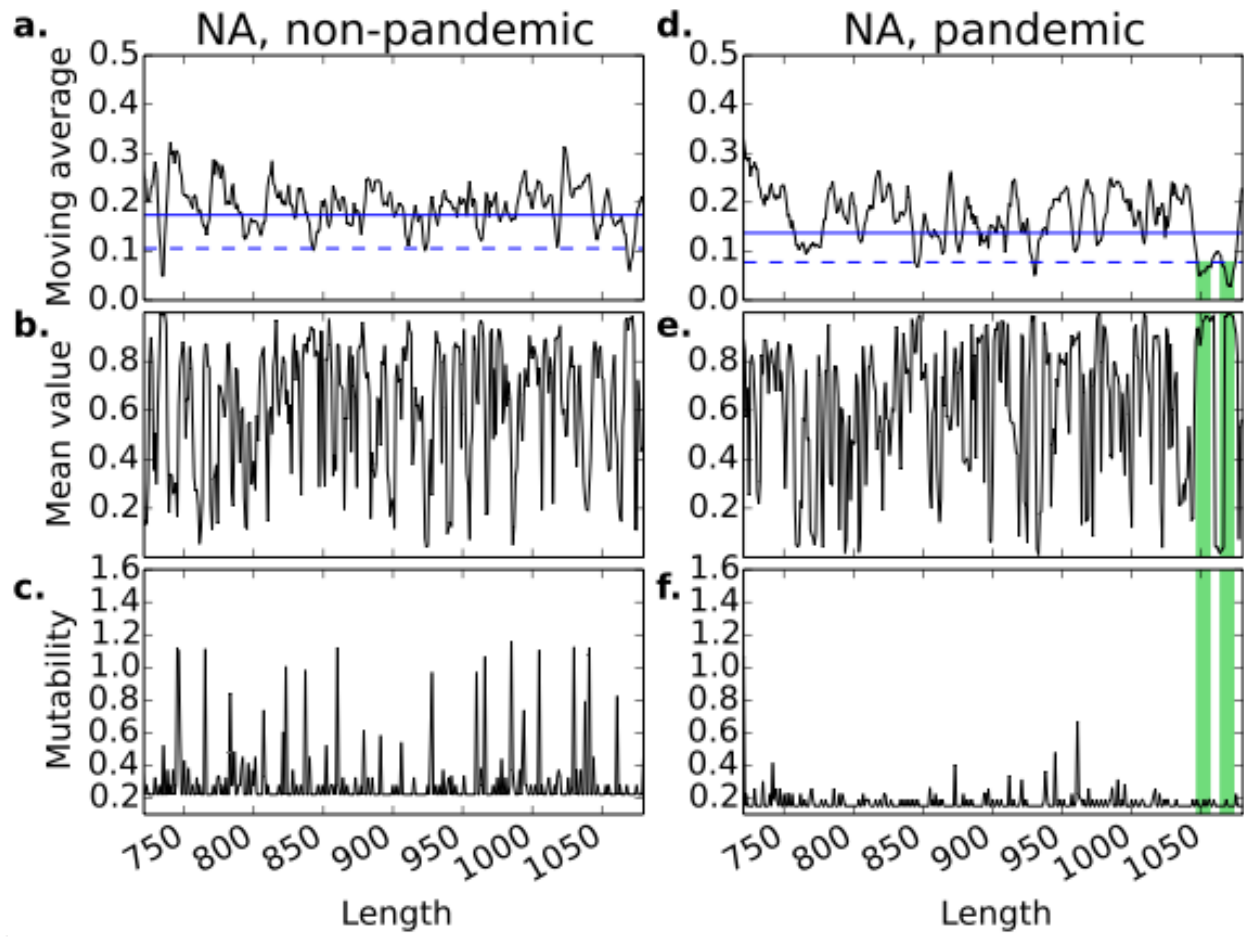



Supplementary Figure 33

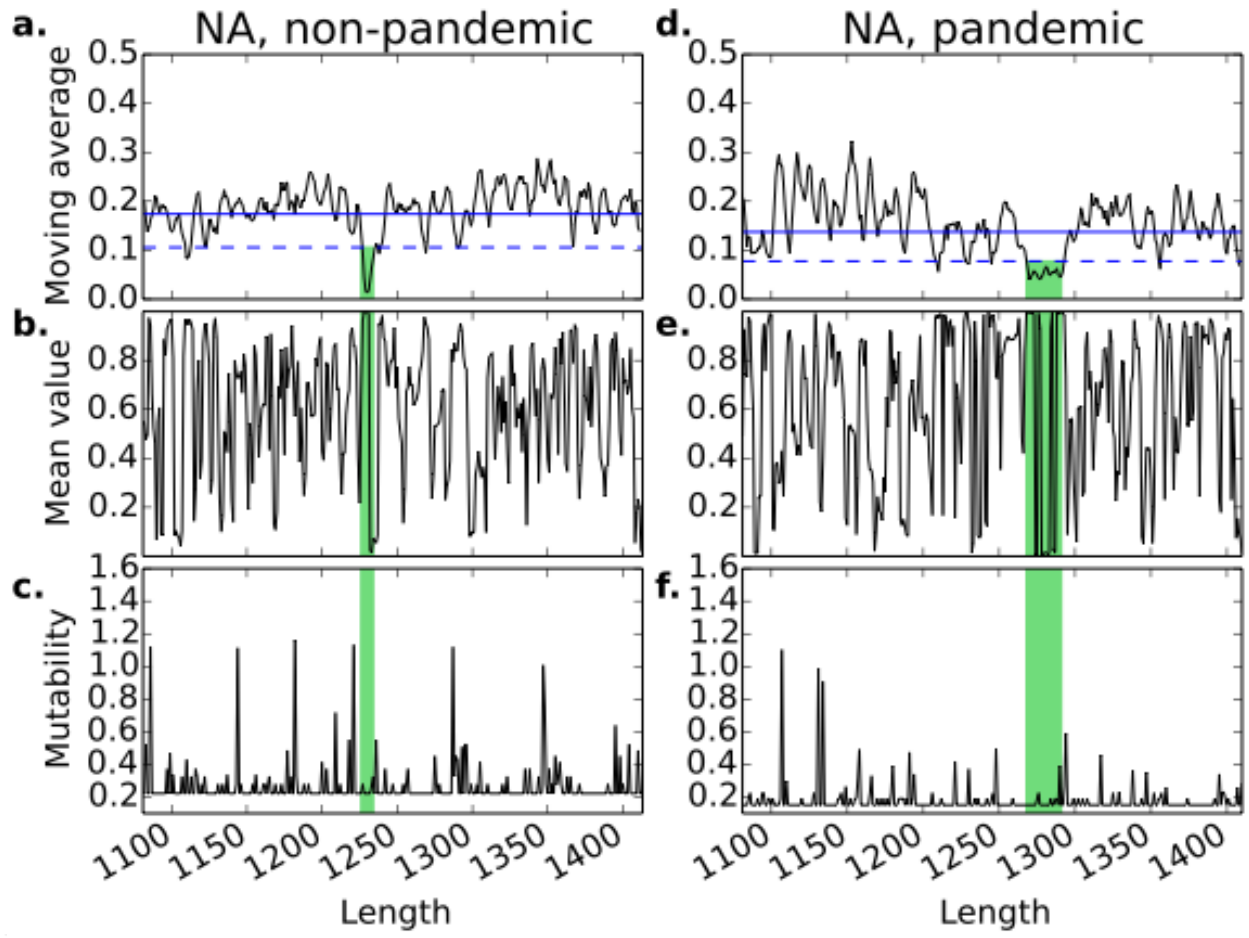

Supplementary Figure 34

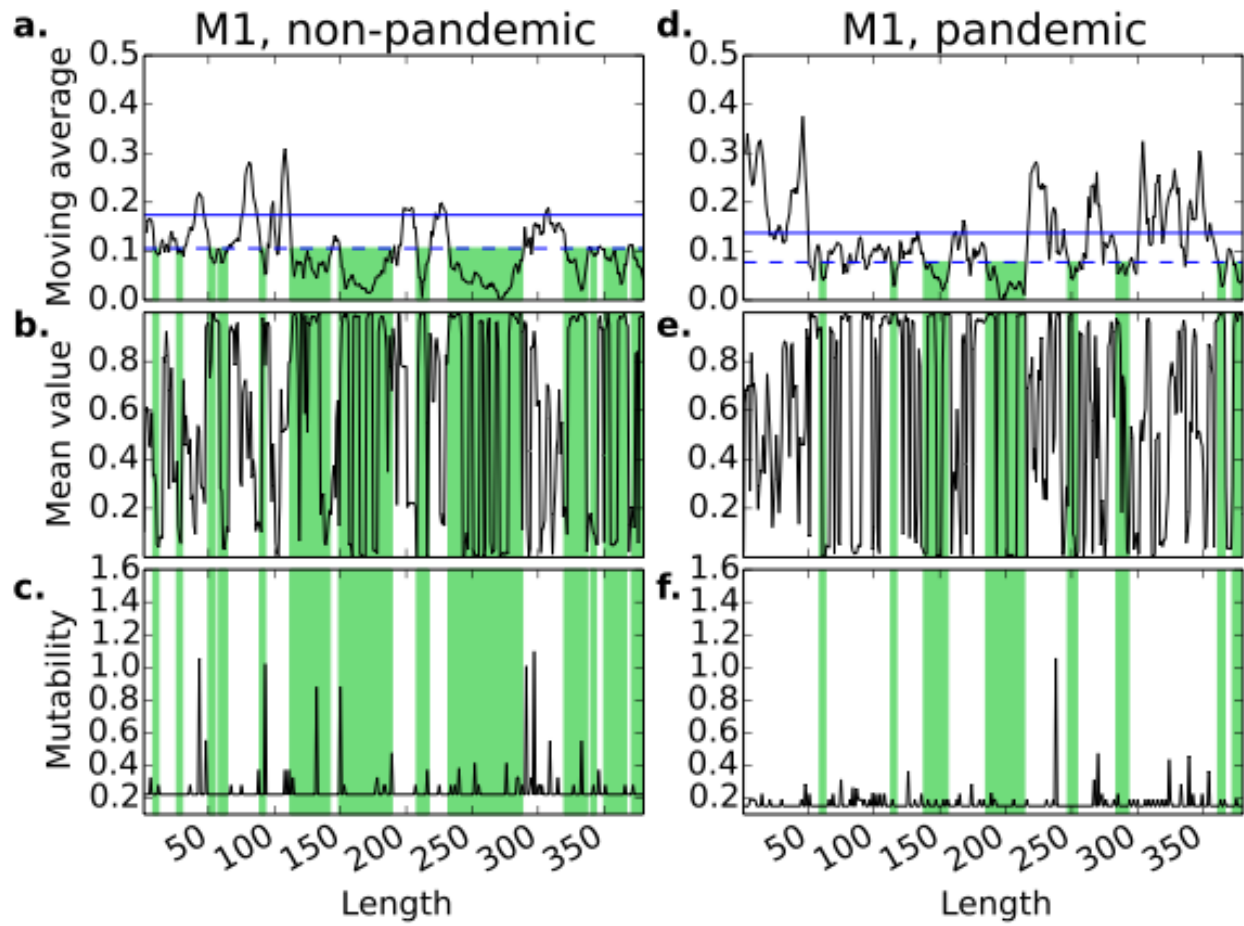

Supplementary Figure 35

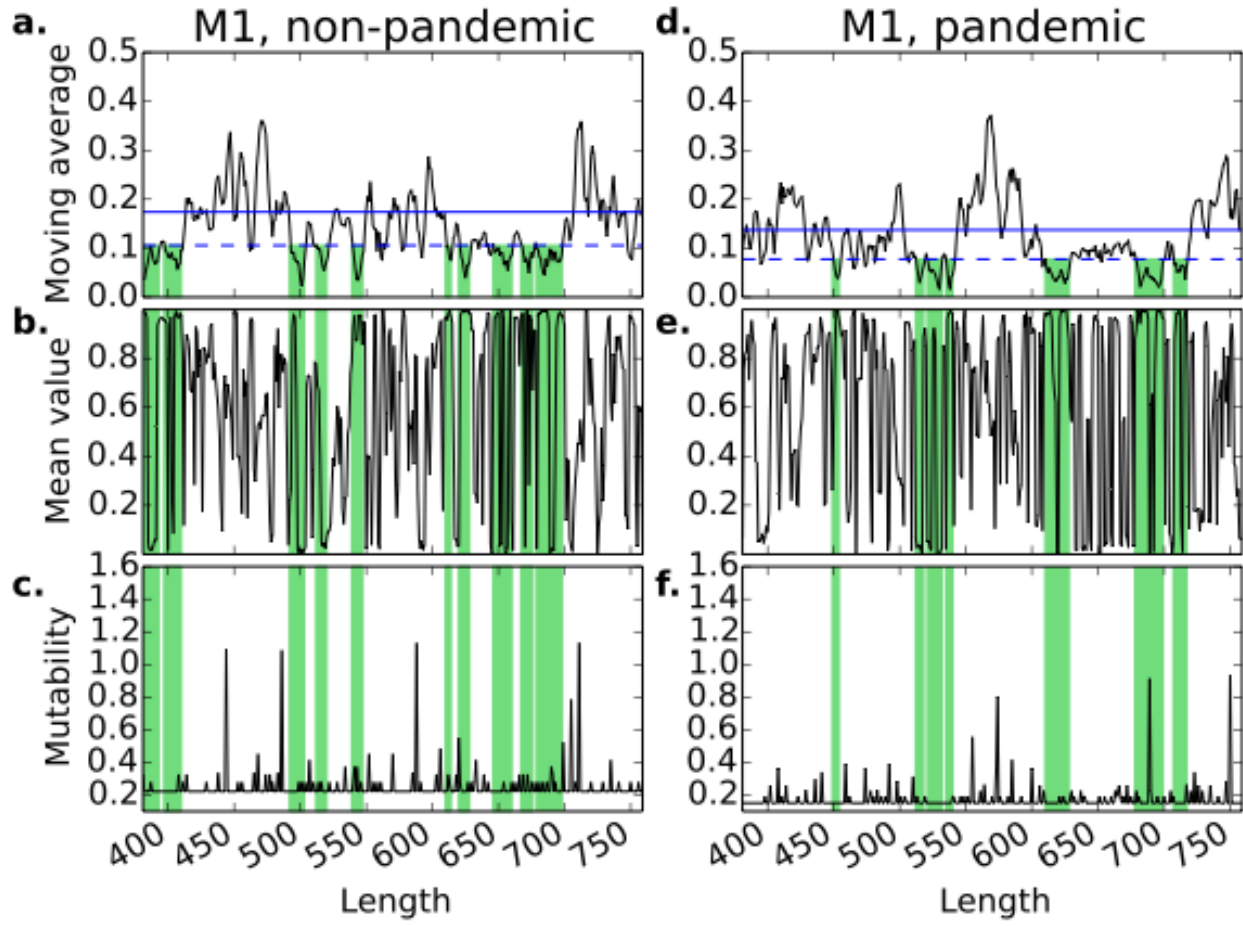

Supplementary Figure 36

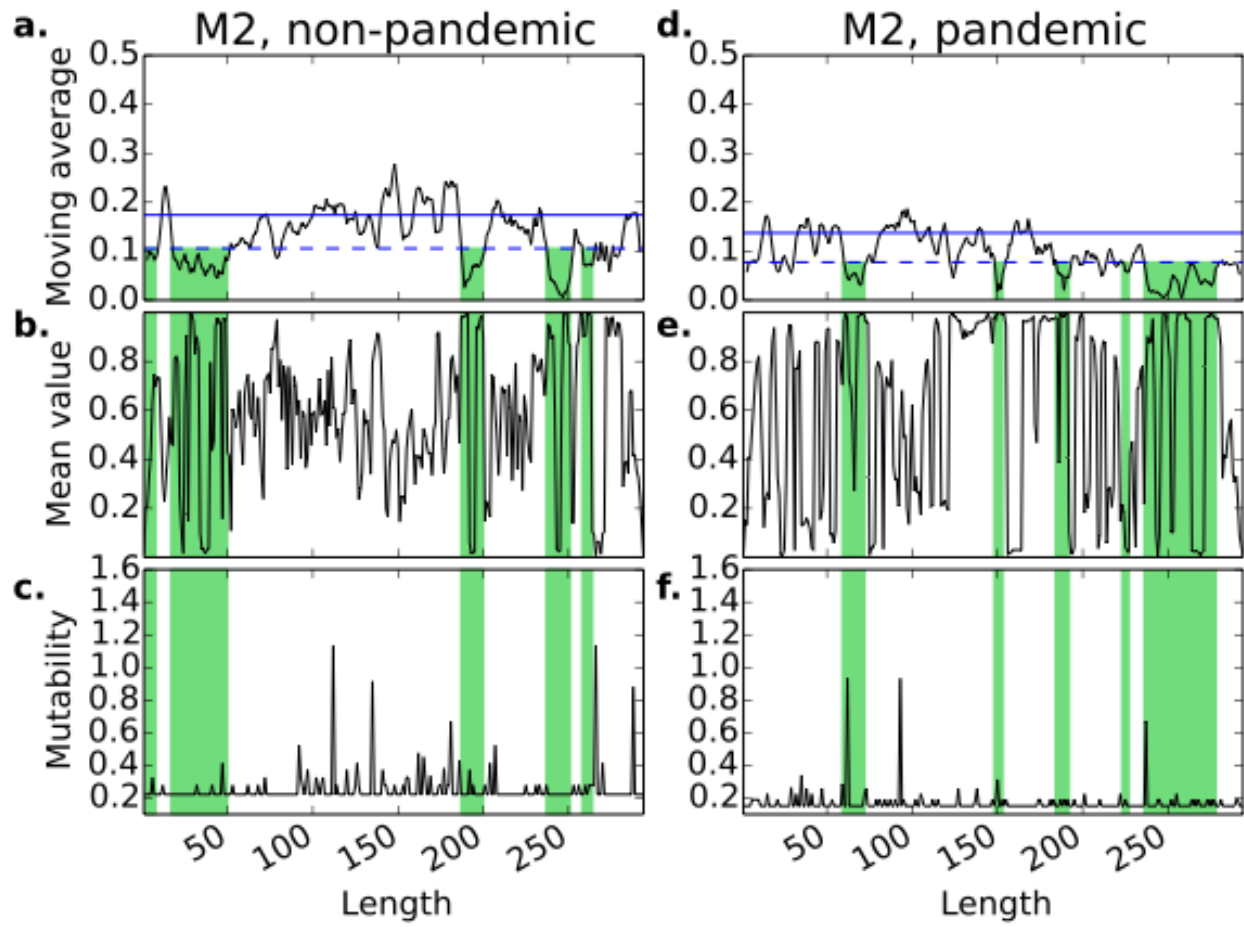

Supplementary Figure 37

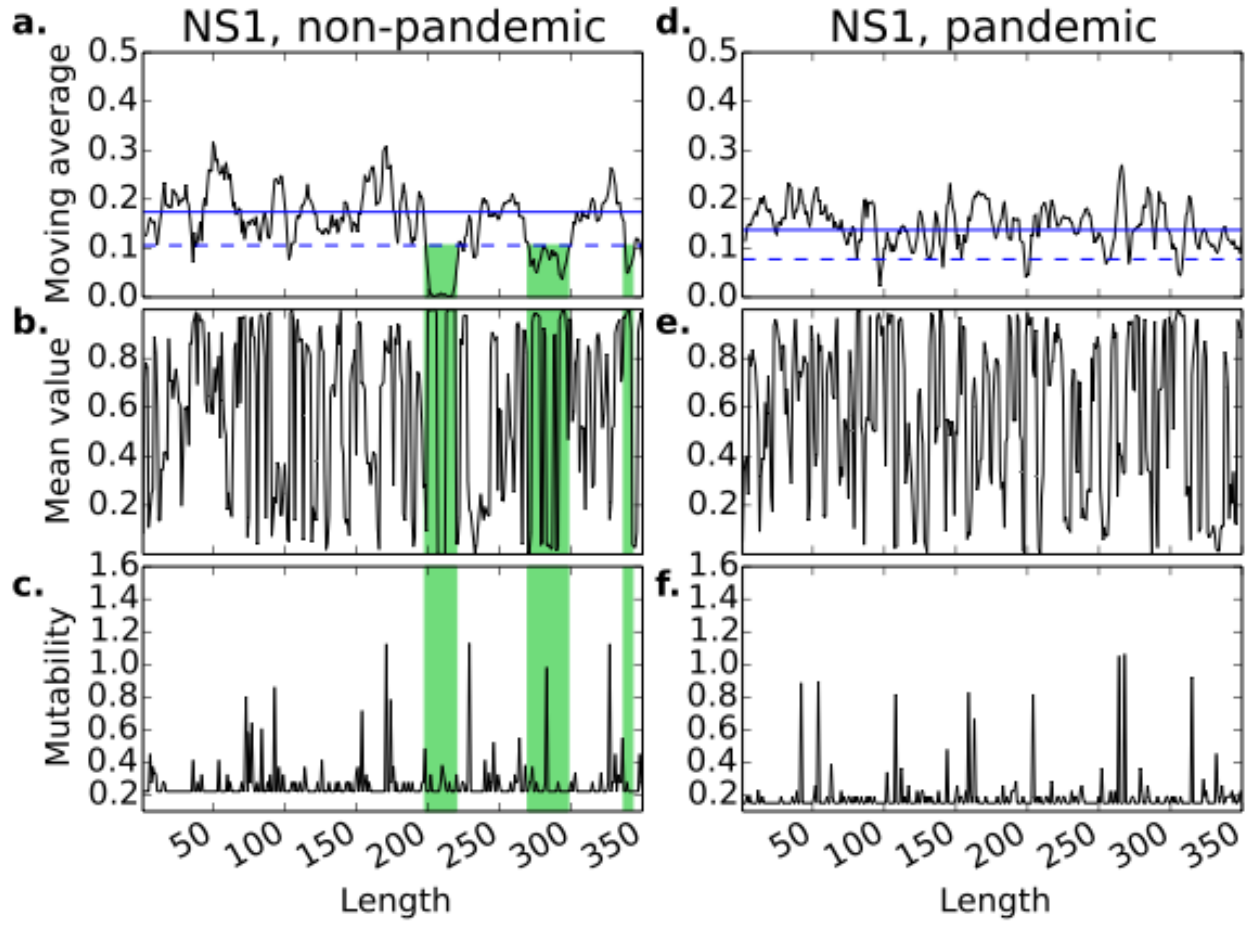

Supplementary Figure 38

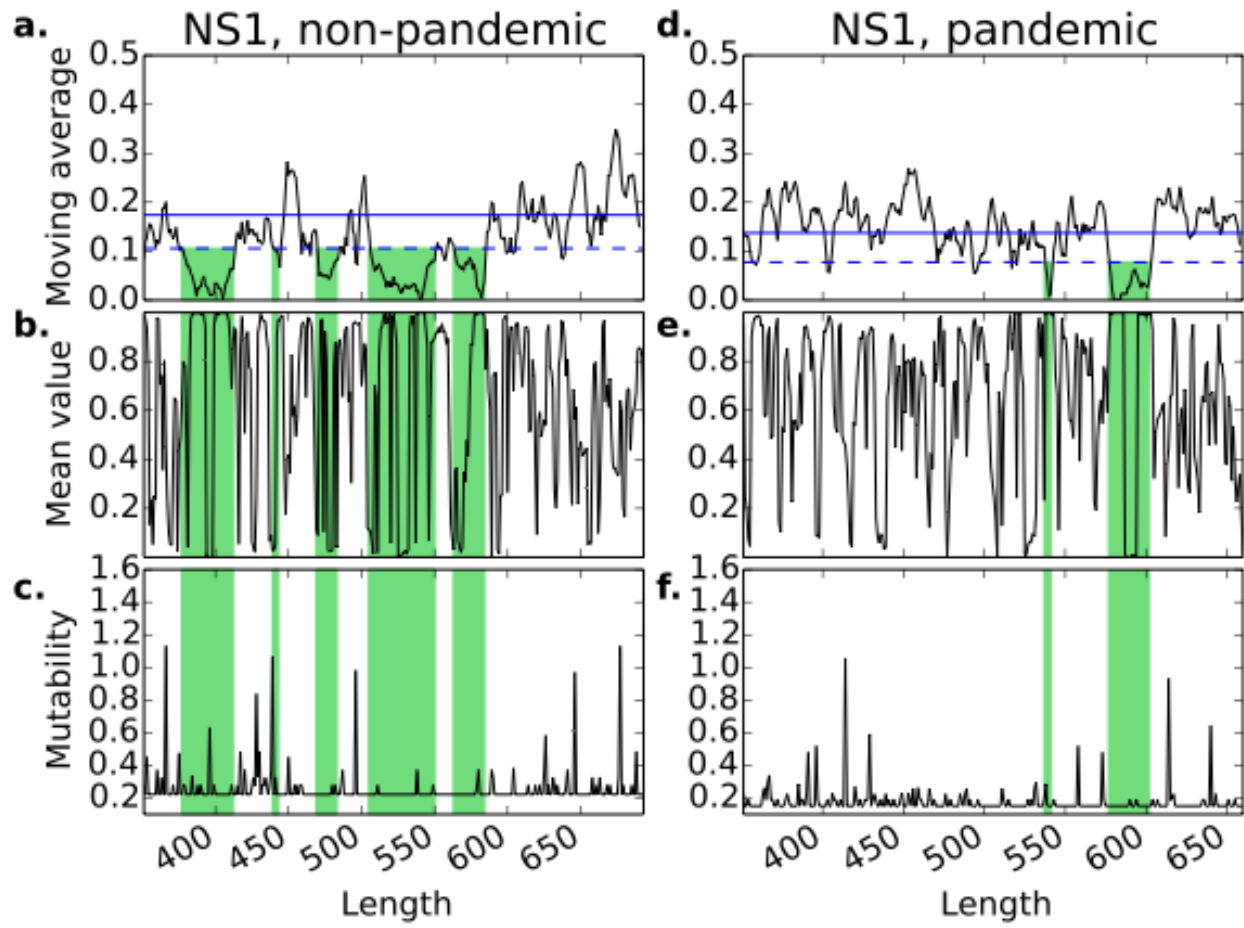

**Supplementary Figures 39-58:** Associations between mutability value for every nucleotide position (position mutability) and corresponding value of moving average of individual standard deviations of the probabilities of nucleotides to be paired (structure variability). X represents structure variability, while Y represents position mutability. The observed correlations are very low, which demonstrates the absence of relationship between these parameters.

Supplementary Figure 39

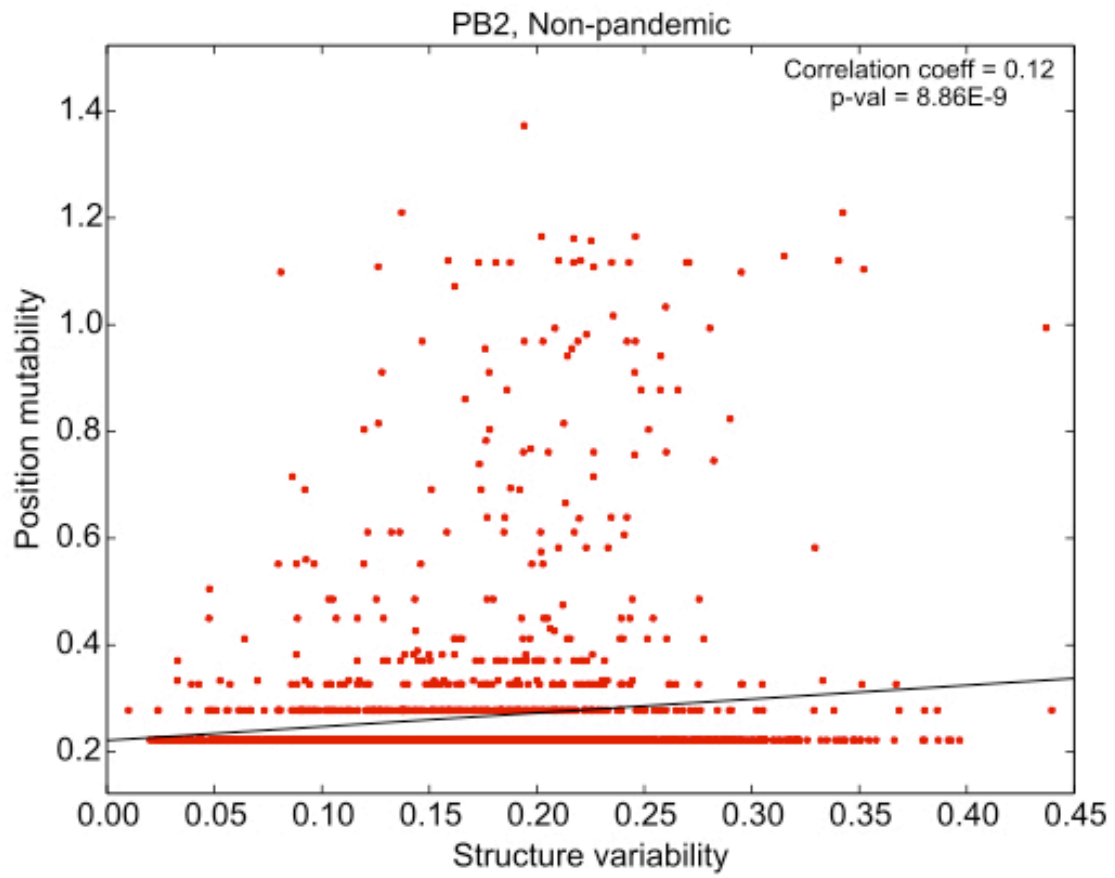



Supplementary Figure 40

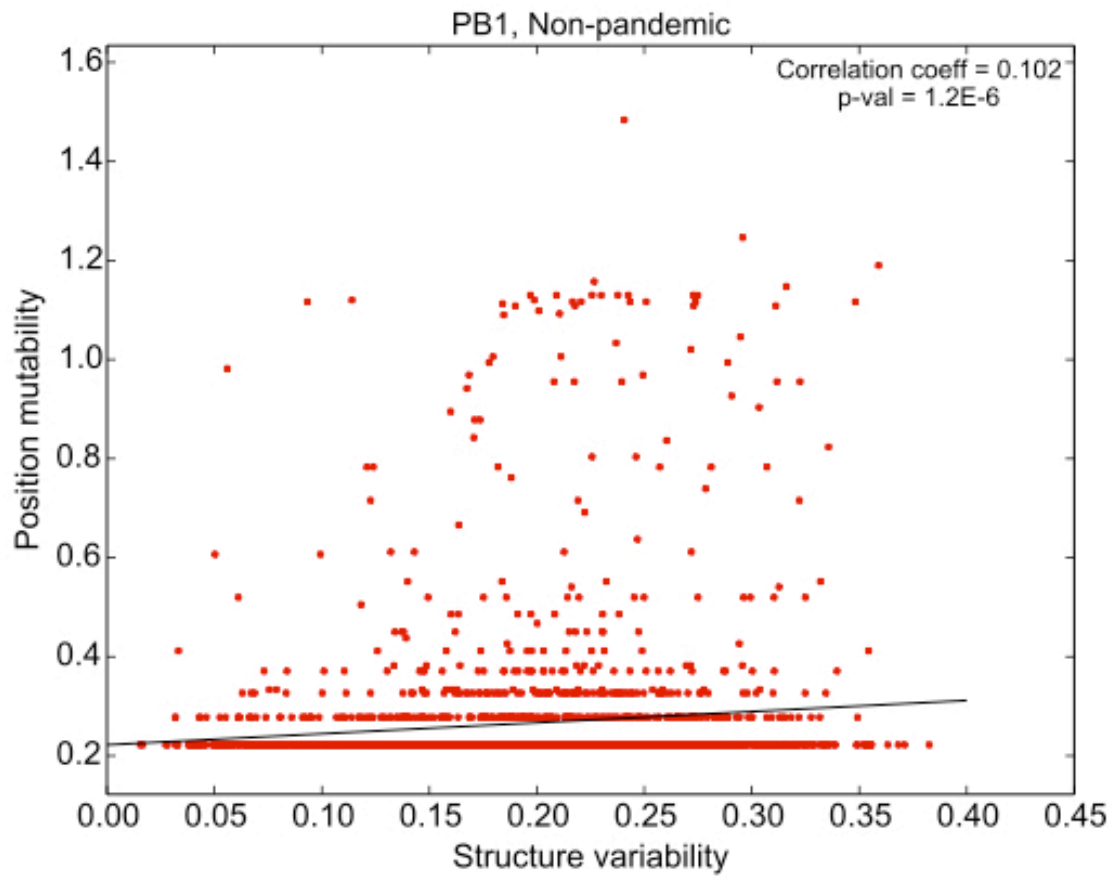

Supplementary Figure 41

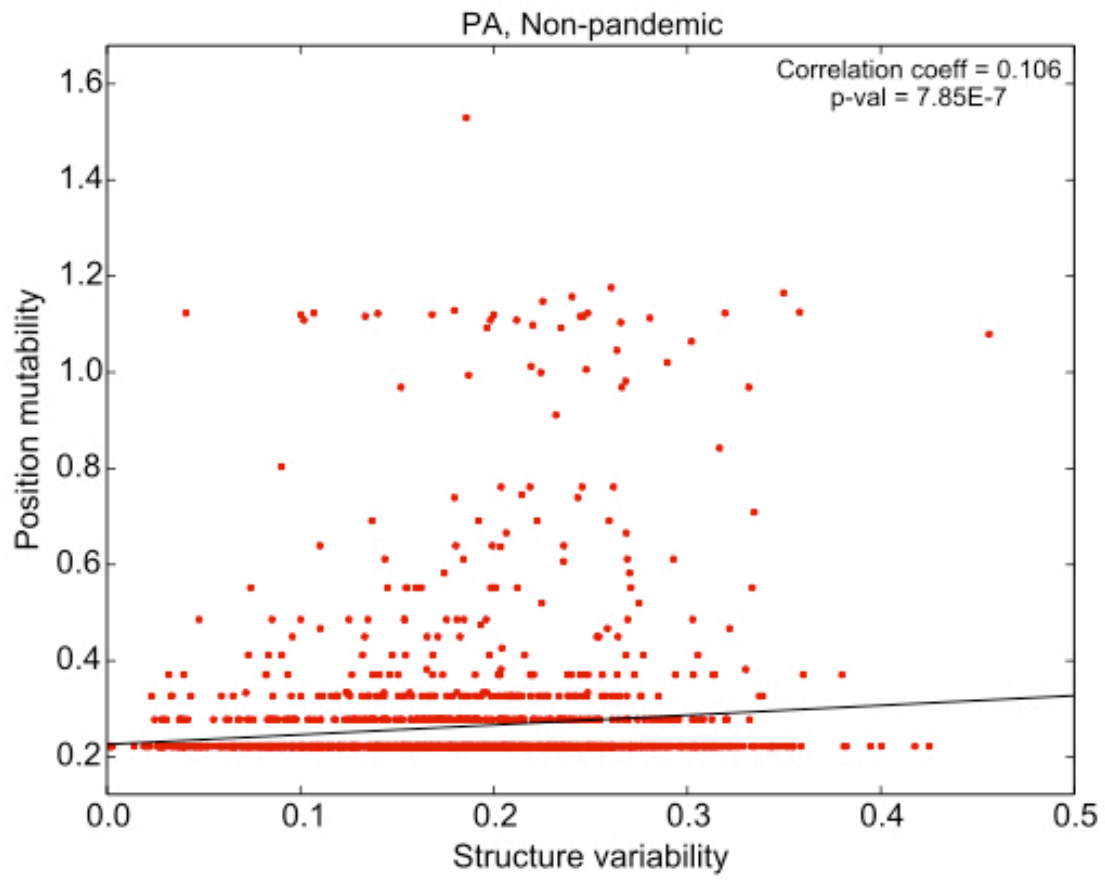

Supplementary Figure 42

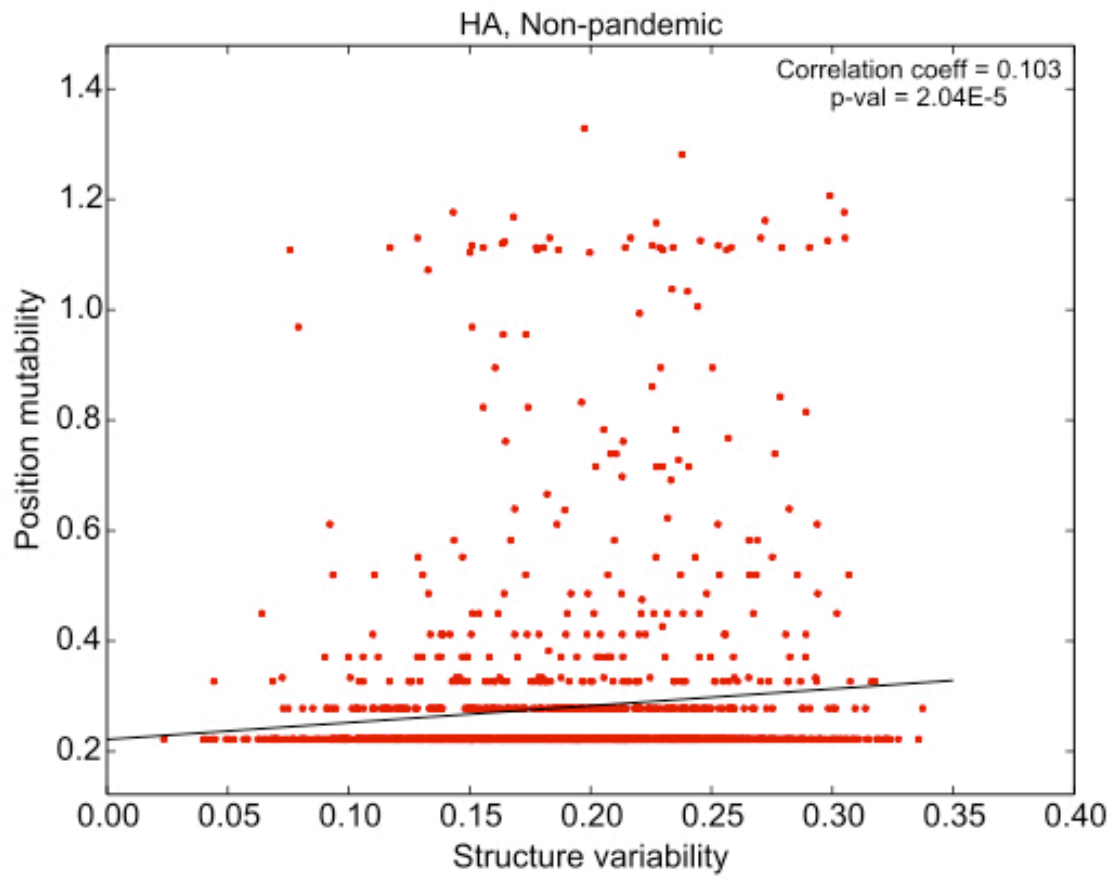

Supplementary Figure 43

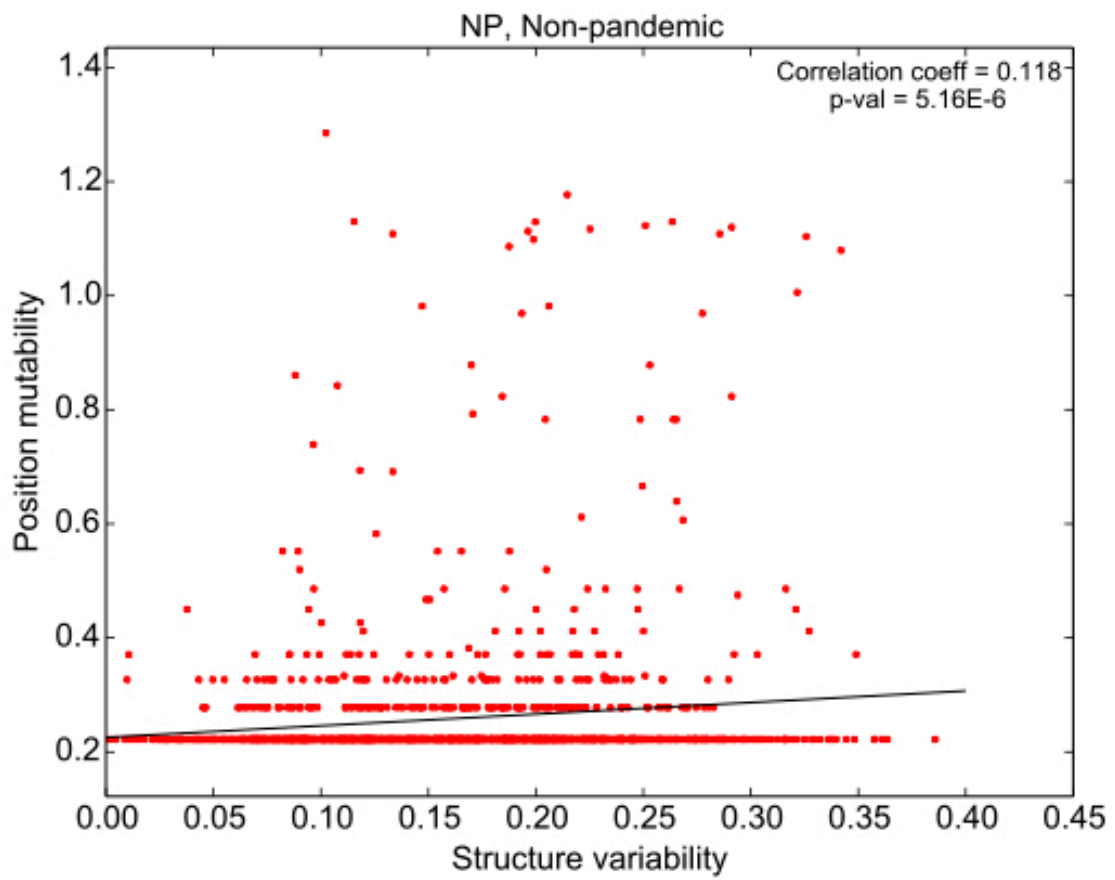

Supplementary Figure 44

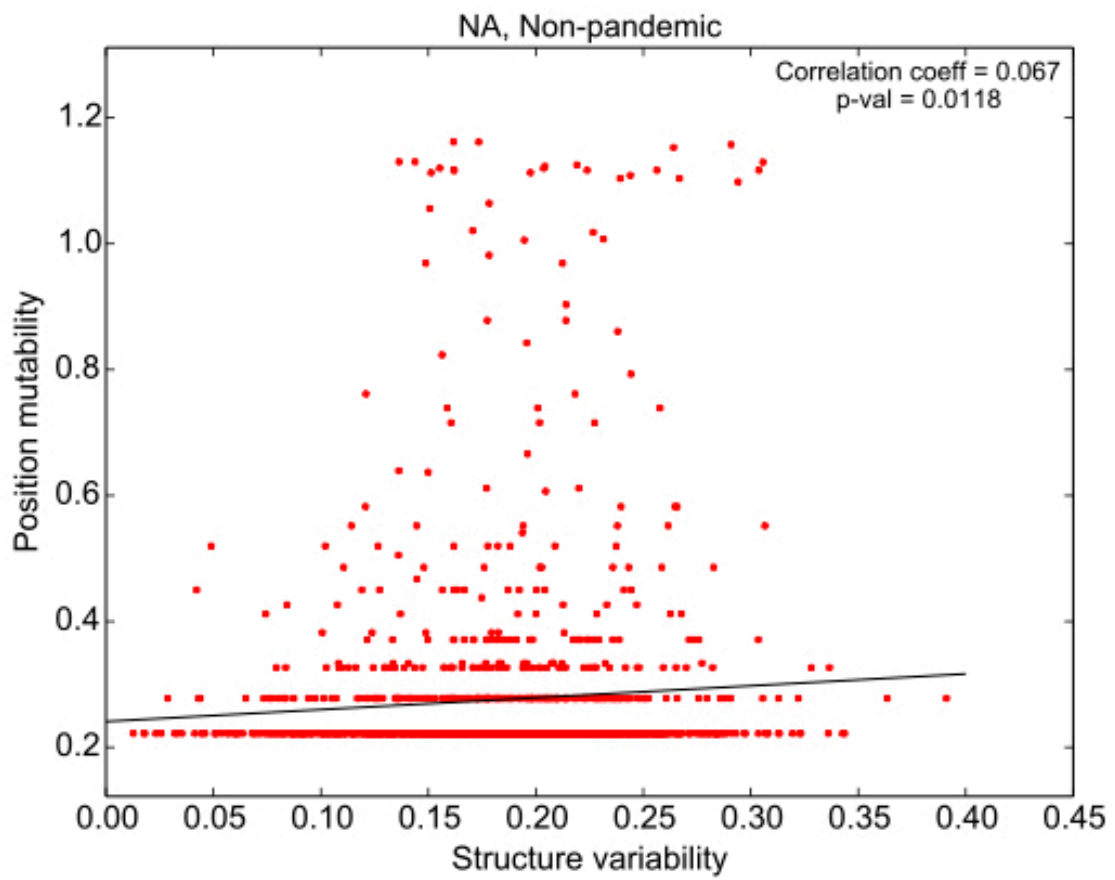

Supplementary Figure 45

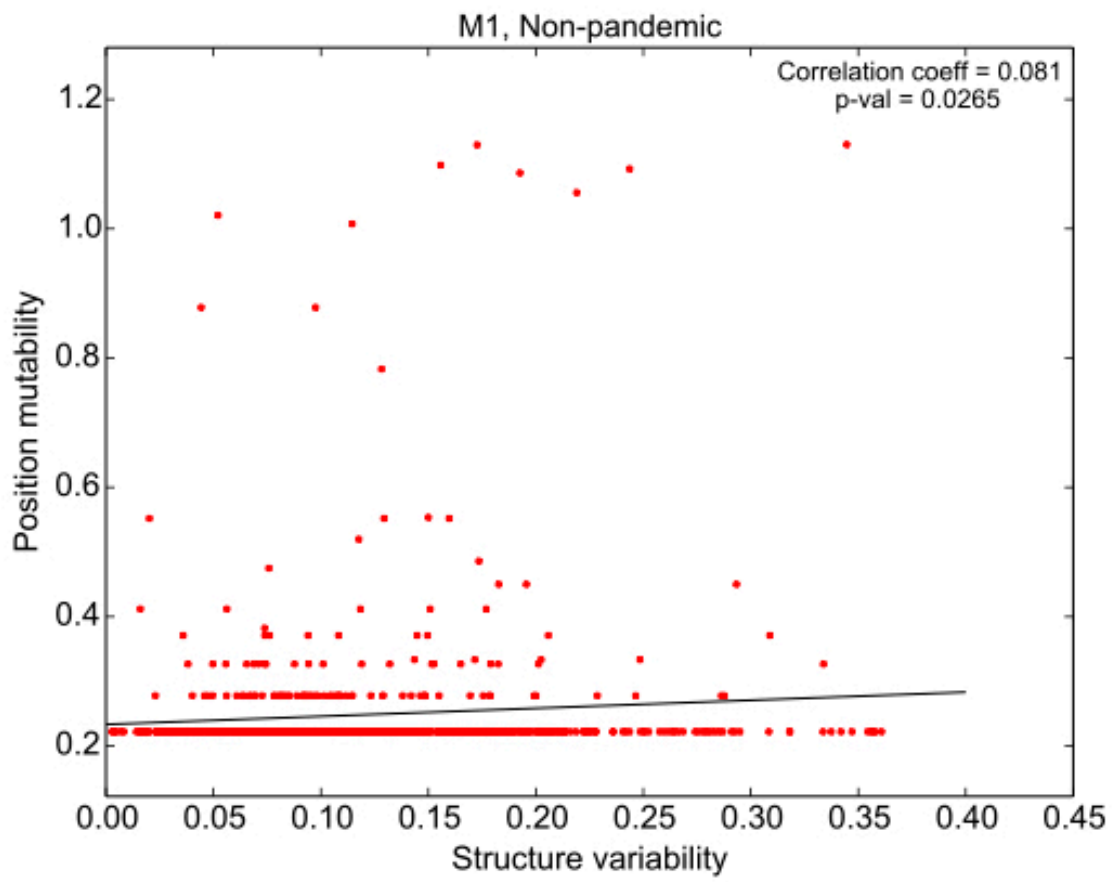

Supplementary Figure 46

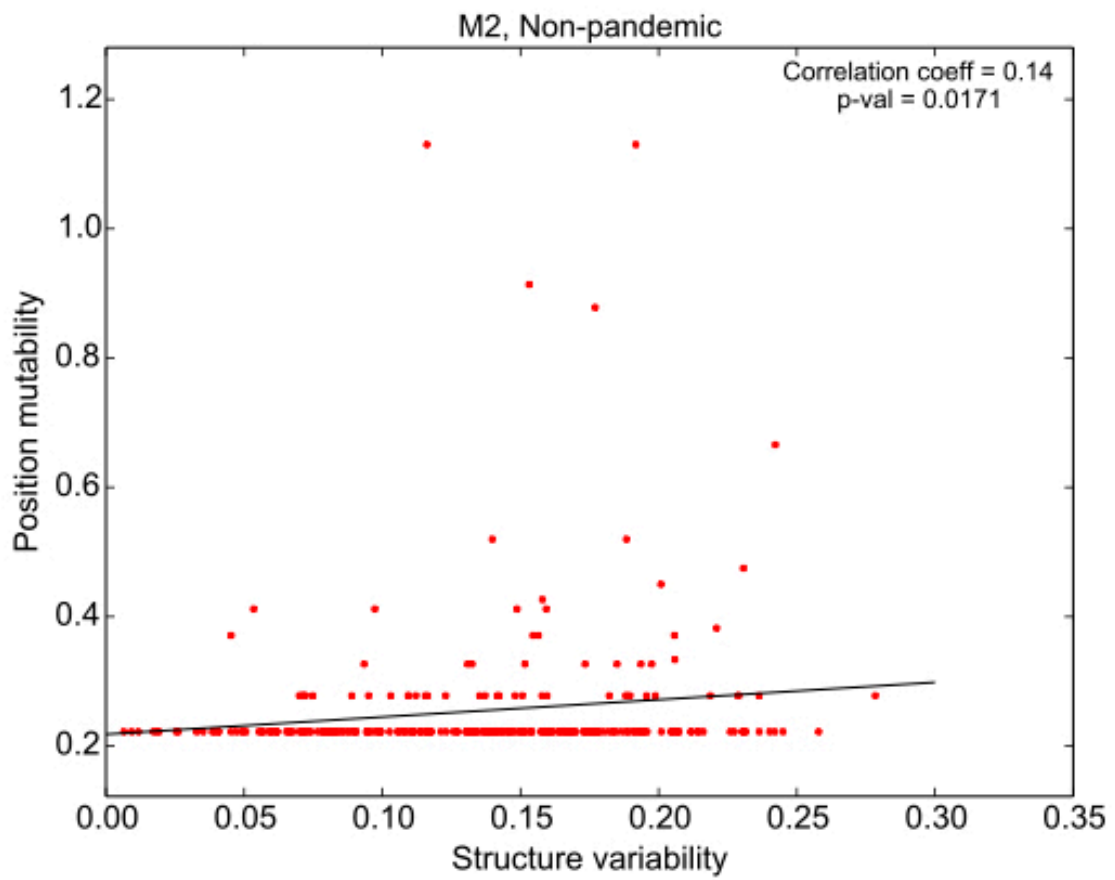





Supplementary Figure 48

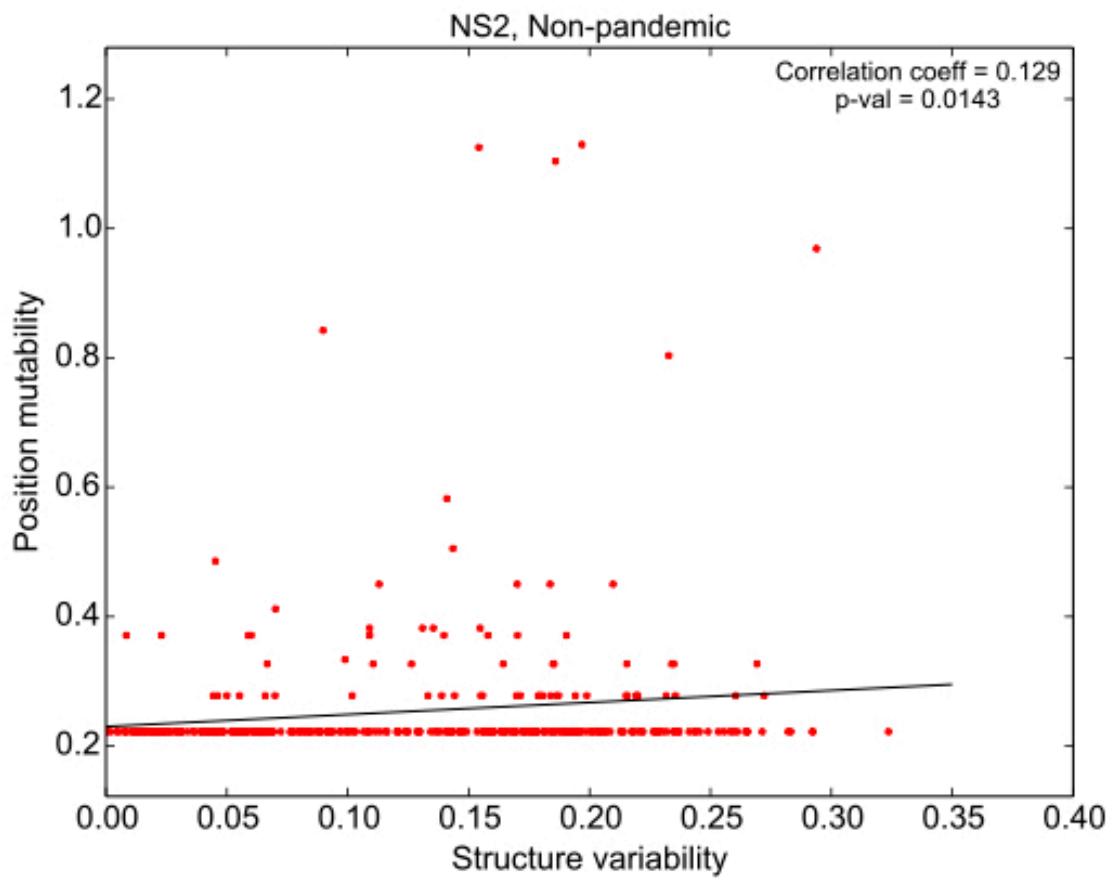

Supplementary Figure 49

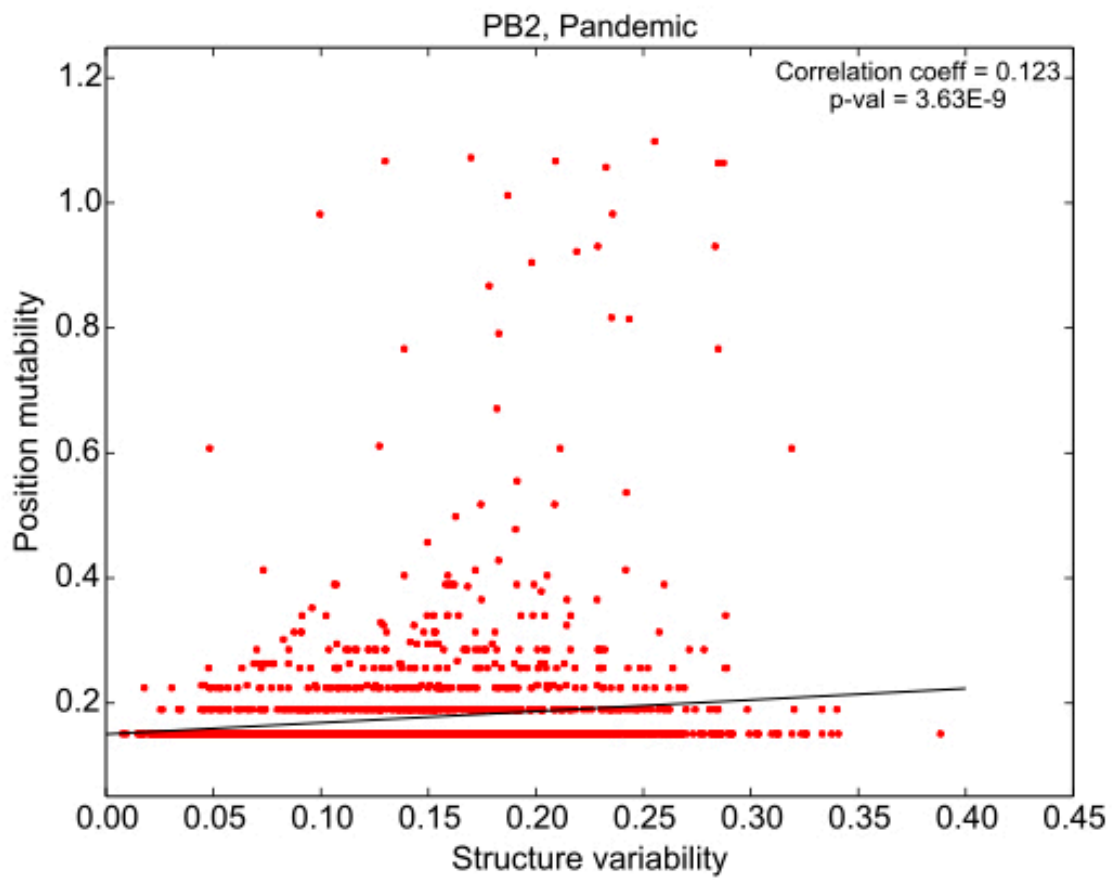

Supplementary Figure 50

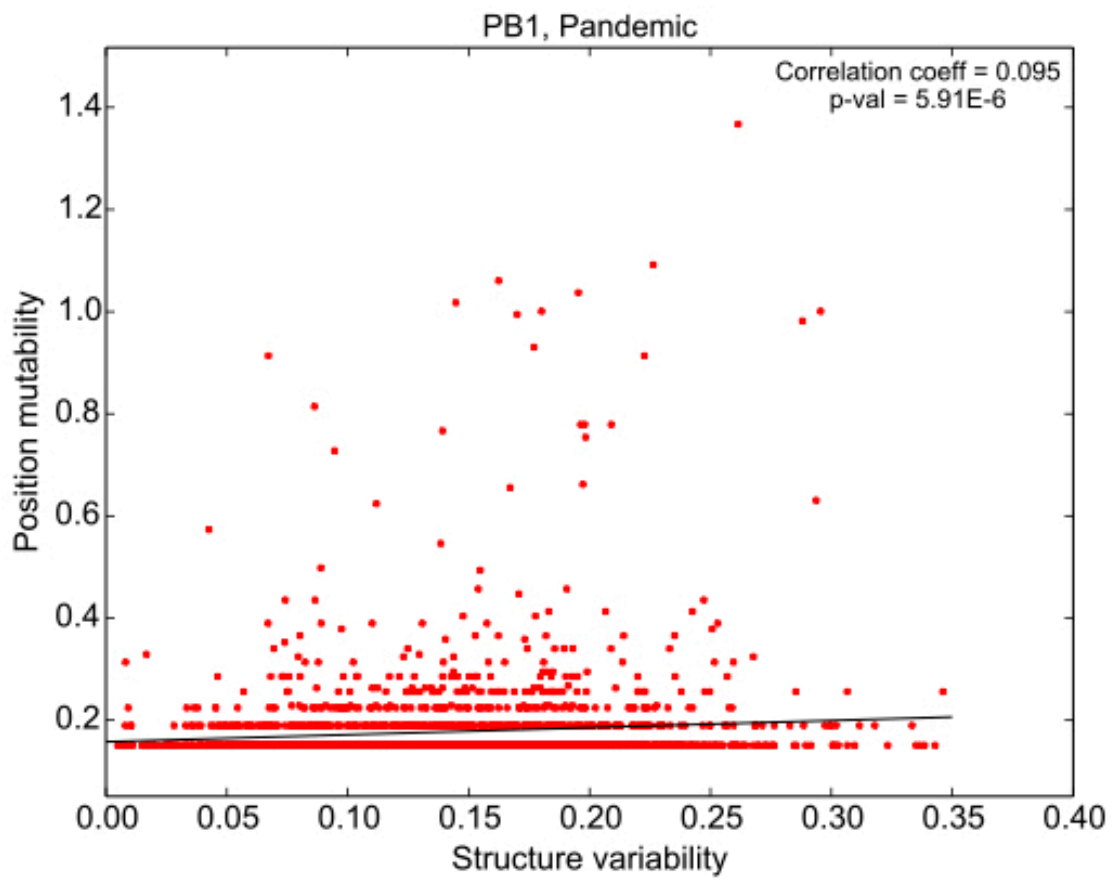

Supplementary Figure 51

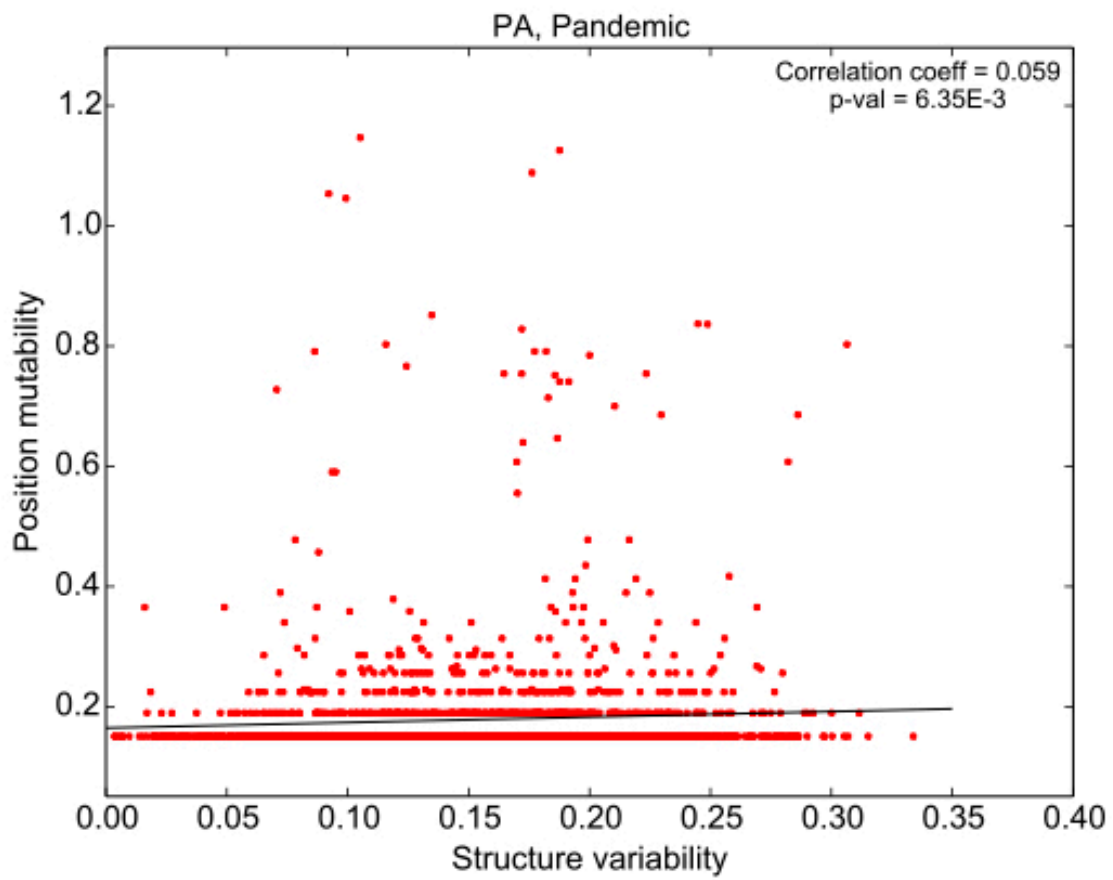

Supplementary Figure 52

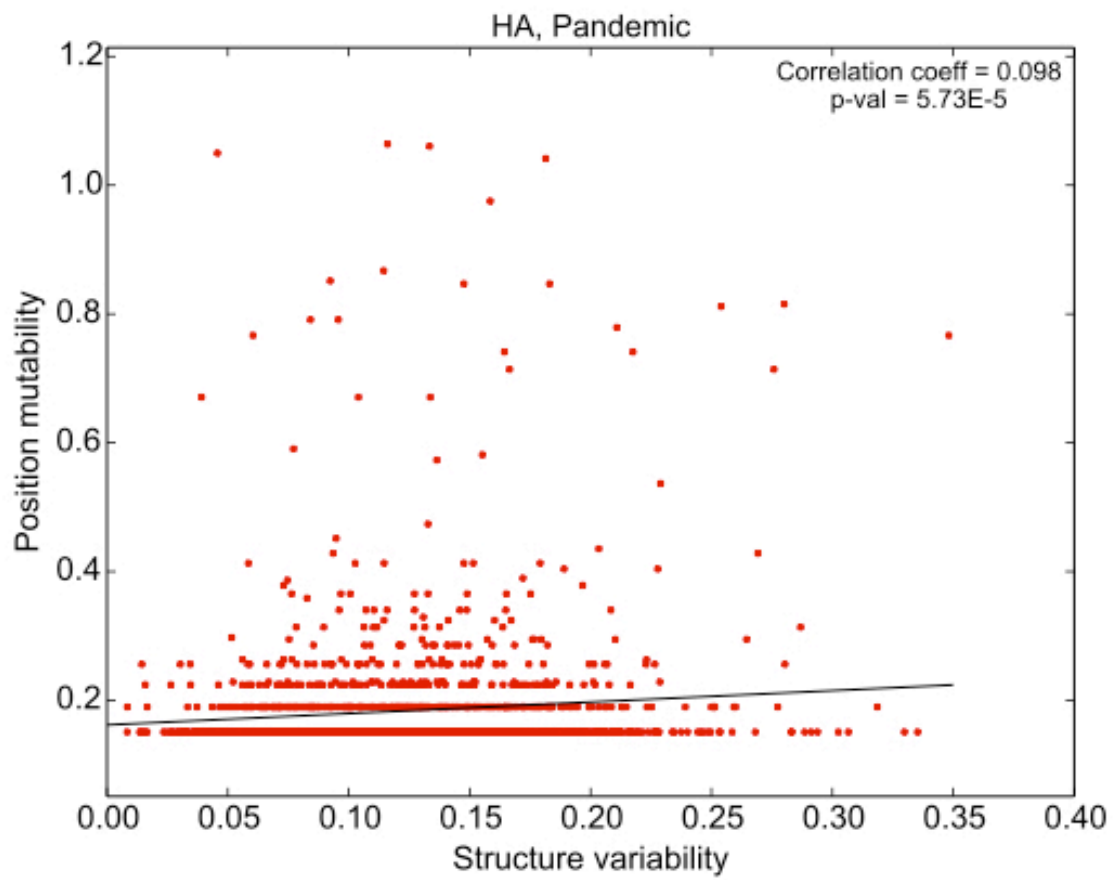

Supplementary Figure 53

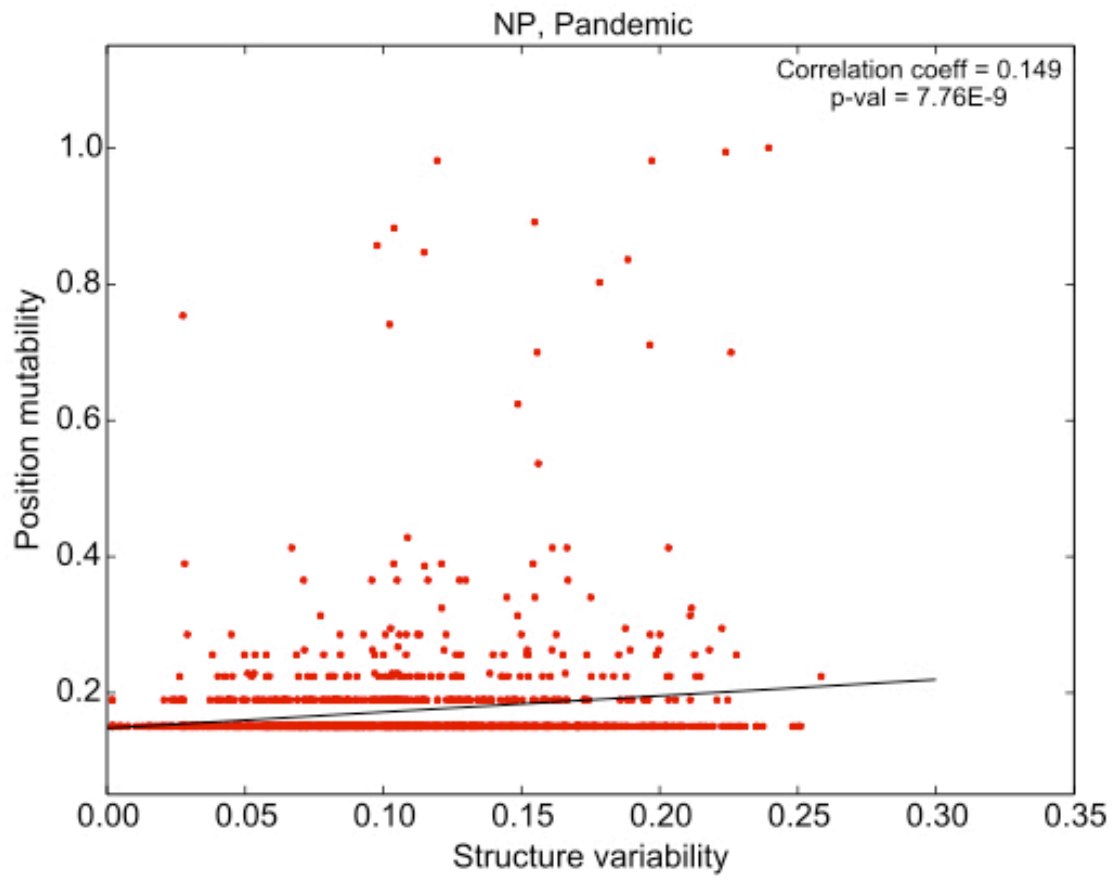

Supplementary Figure 54

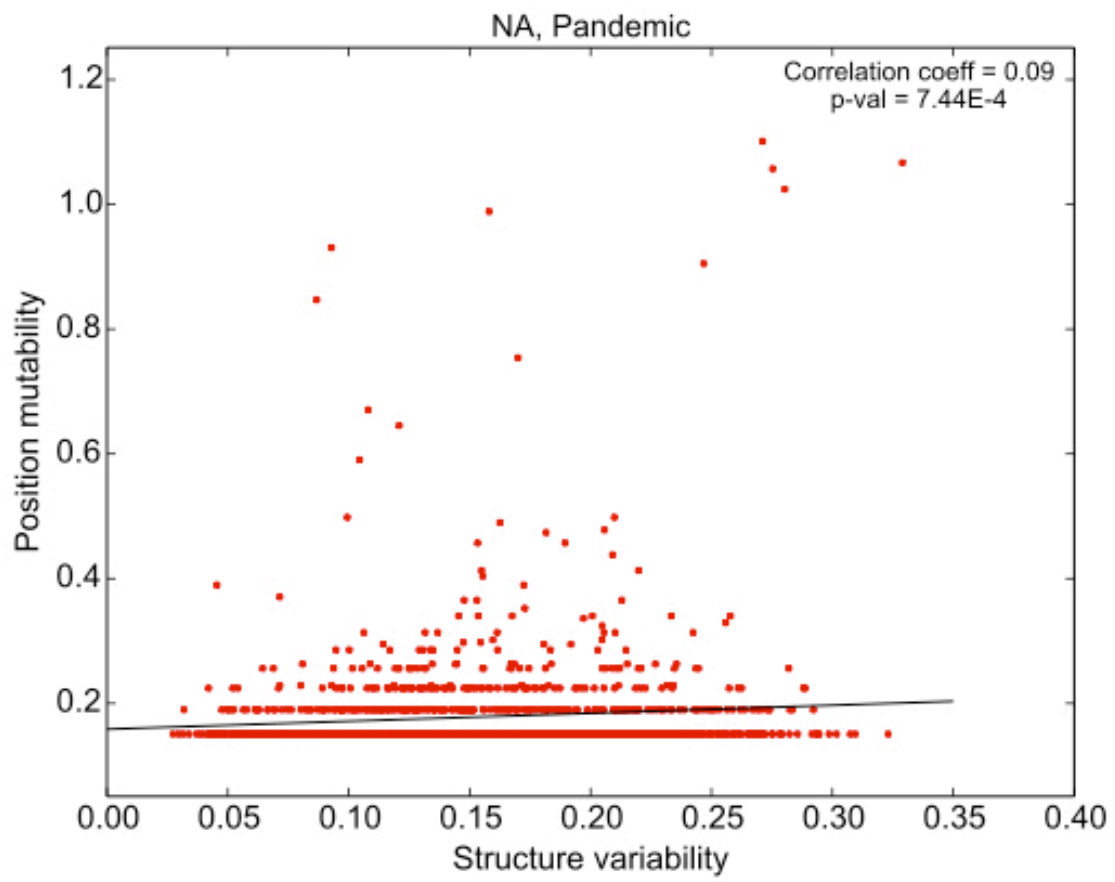

Supplementary Figure 55

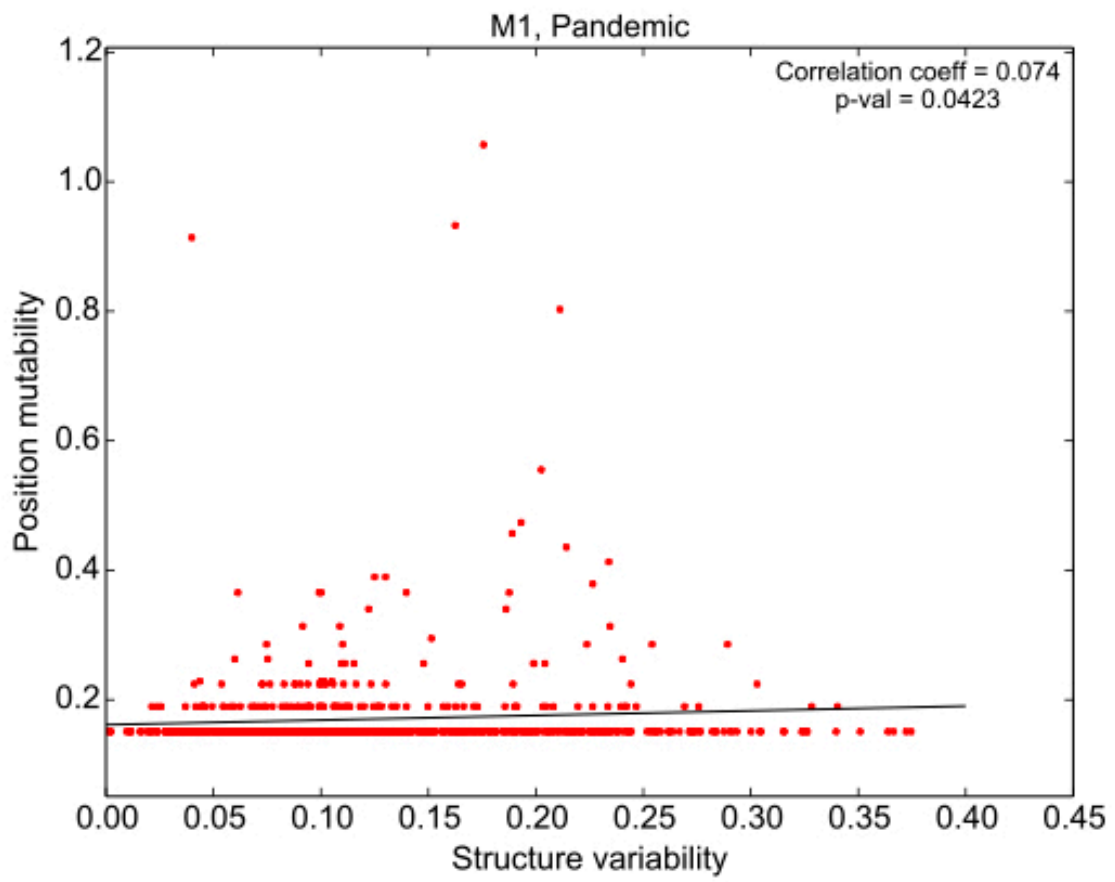



Supplementary Figure 56

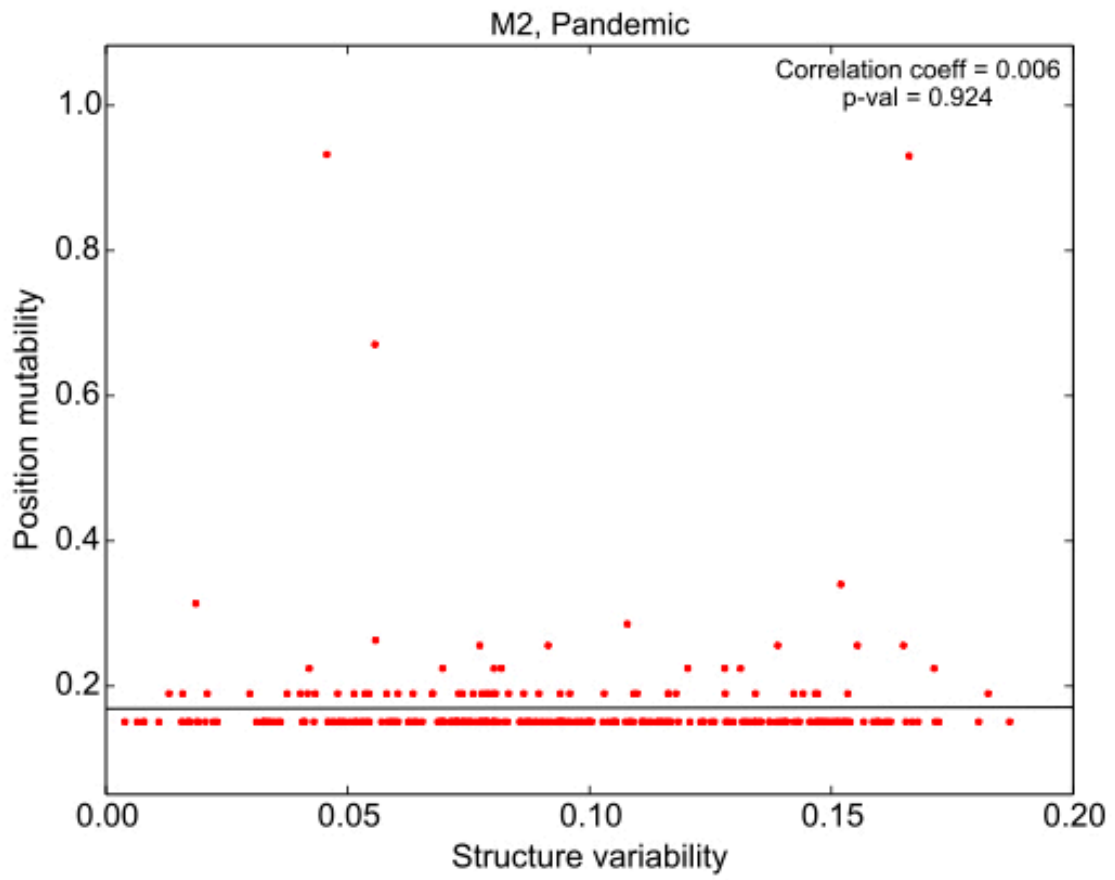

Supplementary Figure 57

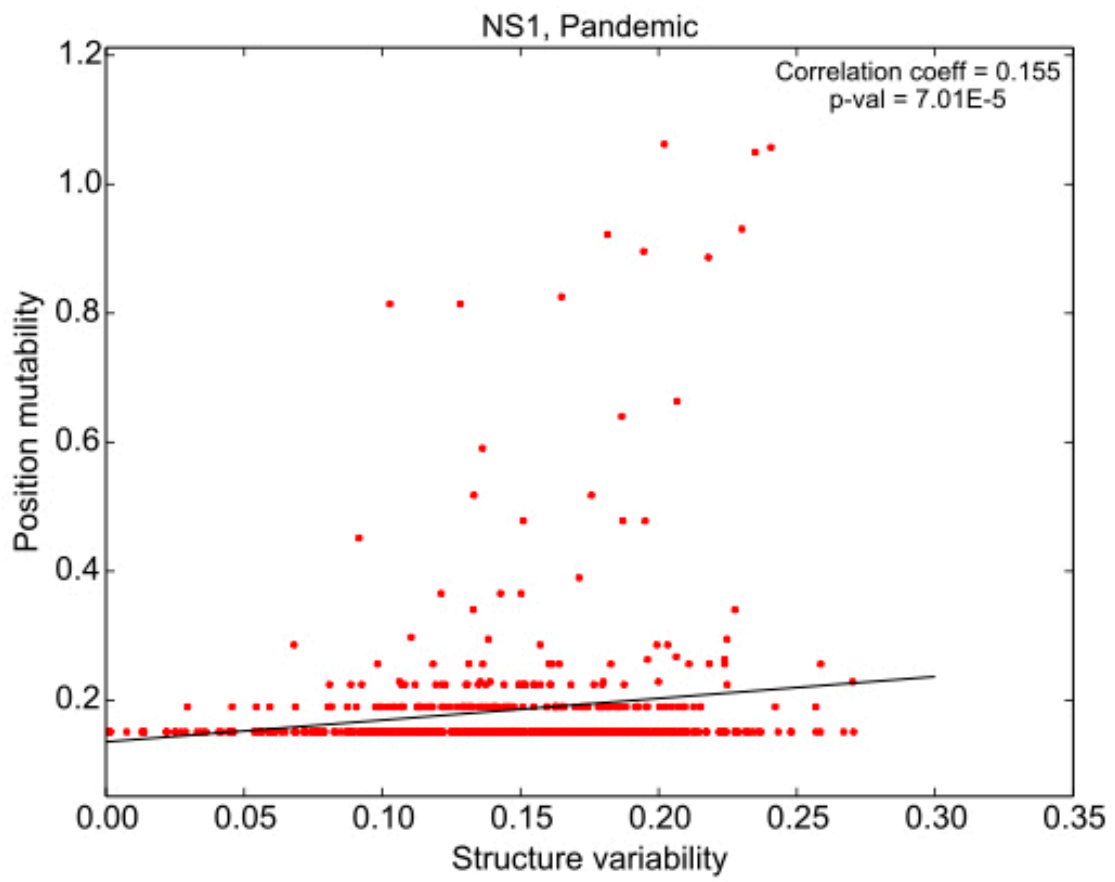

Supplementary Figure 58

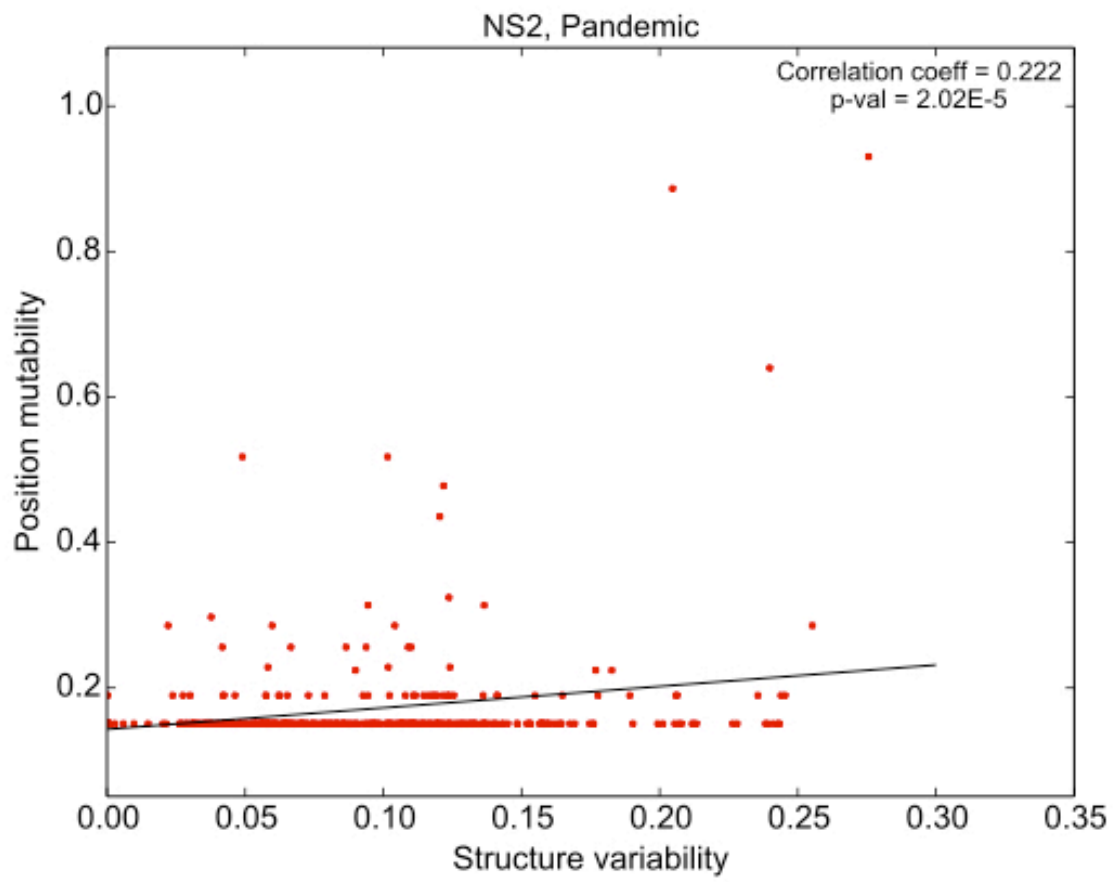

Supplement: Supplementary file [file media-1.pdf]
